# Supplementary material for: Area level impacts on emergency hospital admissions of the integrated care and support pioneer programme in England: difference-in-differences analysis
Source: PubMed Central journal article supplement (PMC6701574; doi:10.1136/bmjopen-2018-026509), 2019-08-18
Supplement: bmjopen-2018-026509.draft_revisions.pdf [file bmjopen-2018-026509.draft_revisions.pdf]

# BMJ Open

BMJ Open is committed to open peer review. As part of this commitment we make the peer review history of every article we publish publicly available.

When an article is published we post the peer reviewers' comments and the authors' responses online. We also post the versions of the paper that were used during peer review. These are the versions that the peer review comments apply to.

The versions of the paper that follow are the versions that were submitted during the peer review process. They are not the versions of record or the final published versions. They should not be cited or distributed as the published version of this manuscript.

BMJ Open is an open access journal and the full, final, typeset and author-corrected version of record of the manuscript is available on our site with no access controls, subscription charges or pay-per-view fees (<http://bmjopen.bmj.com>).

If you have any questions on BMJ Open's open peer review process please email [info.bmjopen@bmj.com](mailto:info.bmjopen@bmj.com)

# BMJ Open

## Area level impacts on emergency hospital admissions of the Integrated Care and Support Pioneer Programme in England: difference-in-differences analysis

|                               |                                                                                                                                                                                                                                                                                                                                                                                                                                                                                                                                                |
|-------------------------------|------------------------------------------------------------------------------------------------------------------------------------------------------------------------------------------------------------------------------------------------------------------------------------------------------------------------------------------------------------------------------------------------------------------------------------------------------------------------------------------------------------------------------------------------|
| Journal:                      | <i>BMJ Open</i>                                                                                                                                                                                                                                                                                                                                                                                                                                                                                                                                |
| Manuscript ID                 | bmjopen-2018-026509                                                                                                                                                                                                                                                                                                                                                                                                                                                                                                                            |
| Article Type:                 | Research                                                                                                                                                                                                                                                                                                                                                                                                                                                                                                                                       |
| Date Submitted by the Author: | 05-Sep-2018                                                                                                                                                                                                                                                                                                                                                                                                                                                                                                                                    |
| Complete List of Authors:     | Keeble, Eilís; The Nuffield Trust<br>Bardsley, M; The Health Foundation<br>Durand, Mary Alison; London School of Hygiene and Tropical Medicine, Policy Innovation Research Unit, Department of Health Services Research and Policy<br>Hoomans, Ties ; London School of Hygiene and Tropical Medicine, Policy Innovation Research Unit, Department of Health Services Research and Policy<br>Mays, Nicholas; London School of Hygiene and Tropical Medicine, Policy Innovation Research Unit, Department of Health Services Research and Policy |
| Keywords:                     | Quality in health care < HEALTH SERVICES ADMINISTRATION & MANAGEMENT, STATISTICS & RESEARCH METHODS, Organisation of health services < HEALTH SERVICES ADMINISTRATION & MANAGEMENT, Health policy < HEALTH SERVICES ADMINISTRATION & MANAGEMENT                                                                                                                                                                                                                                                                                                |
|                               |                                                                                                                                                                                                                                                                                                                                                                                                                                                                                                                                                |

SCHOLARONE™  
Manuscripts

1  
2  
3 **Area level impacts on emergency hospital admissions of the Integrated Care and**  
4 **Support Pioneer Programme in England: difference-in-differences analysis**  
5  
6  
7

8 Corresponding author: Eilís Keeble, The Nuffield Trust, 59 New Cavendish Street, London,  
9 W1G 7LP, United Kingdom, email: eilis.keeble@nuffieldtrust.org.uk, phone: 0207 631 8450  
10  
11

12 Martin Bardsley, The Health Foundation (Formerly of The Nuffield Trust), London, United  
13  
14

15 Mary Alison Durand, Policy Innovation Research Unit, Department of Health Services  
16 Research and Policy, London School of Hygiene and Tropical Medicine, London, United  
17 Kingdom  
18  
19

20  
21 Ties Hoomans, Policy Innovation Research Unit, Department of Health Services Research and  
22 Policy, London School of Hygiene and Tropical Medicine, London, United Kingdom  
23  
24

25  
26 Nicholas Mays, Policy Innovation Research Unit, Department of Health Services Research and  
27 Policy, London School of Hygiene and Tropical Medicine, London, United Kingdom  
28  
29

30  
31 Word Count: 2,858  
32  
33  
34  
35  
36  
37  
38  
39  
40  
41  
42  
43  
44  
45  
46  
47  
48  
49  
50  
51  
52  
53  
54  
55  
56  
57  
58  
59  
60

## ABSTRACT

### Objective

To examine whether any differential change in emergency admissions could be attributed to Pioneer status by comparing Pioneer and non-Pioneer populations from a pre-Pioneer baseline period (2010/11 to 2012/13) to two follow-up periods: 2014/15 and 2015/16.

### Design

Difference-in-differences analysis of emergency hospital admissions from Hospital Episode Statistics (HES).

### Setting

Local authorities in England classified as either Pioneer or non-Pioneer.

### Participants

Emergency admissions to all NHS hospitals in England with local authority determined by area of residence of the patient.

### Intervention

Wave 1 of the Integrated Care and Support Pioneer Programme announced in November 2013.

### Primary Outcome Measure

Hospital emergency admissions.

### Results

The increase in the Pioneer emergency admission rate from baseline to 2014/15 was smaller at 1.42 per cent and significantly different from that of the non-Pioneers at 4.44 per cent ( $p=0.0161$ ). The increase in the Pioneer emergency admission rate from baseline to 2015/16 was again smaller than for the non-Pioneers but the difference was not statistically significant ( $p=0.1272$ ).

### Conclusions

It is ambitious to expect unequivocal changes in a high level and indirect indicator of care integration such as emergency hospital admissions to arise as a result of the changes in local health and social care provision across organisations brought about by the Pioneers in their

1  
2  
3 early years and we should treat any indication that the Pioneers have had such an impact with  
4 caution. Nevertheless, there does seem to be an indication from the current analysis that  
5 there were some changes in hospital use associated with the first year of Pioneer status that  
6 are worthy of further exploration.  
7  
8  
9

## 10 11 12 **STRENGTHS AND LIMITATIONS OF THIS STUDY**

- 13  
14 1. This study adds to the evidence of the impact of system-wide approaches to  
15 integrating health and social care, like the Pioneer Programme, using advanced  
16 statistical methods to analyse HES and determine whether the Pioneers reduced  
17 emergency admissions.  
18  
19
- 20  
21 2. Emergency admissions data are continuously collected which makes them more  
22 susceptible to change than many other measures of health and social care integration  
23 and reducing them is often cited as a key goal of new models of care.  
24  
25
- 26  
27 3. Analysing the Pioneer sites collectively ensured they covered a diverse range of areas  
28 and were unlikely to be systematically different at baseline from the non-Pioneers.  
29  
30
- 31  
32 4. It is difficult to find a true counter-factual population to compare with the Pioneers as  
33 many other initiatives around health and social care integration were developed in  
34 other areas of the country almost simultaneously.  
35  
36
- 37  
38 5. The Pioneers invested in a collection of health and social care integration strategies  
39 and interventions; detecting the causes and effects of these specific initiatives would  
40 require local datasets and limit the generalisability of findings to the Pioneers as a  
41 whole.  
42  
43  
44

## 45 46 **KEYWORDS**

47 Organisation of health services, quality in health care, health policy, statistics and research  
48 methods  
49  
50  
51  
52  
53  
54  
55  
56  
57  
58  
59  
60

## INTRODUCTION

In November 2013, the Integrated Care and Support Pioneer programme was initiated in England. The prime stated objective was to meet people's needs better and improve service users' experience of care by encouraging more integrated ways of working between local NHS and social care providers.[1]

In the first wave of the programme the UK government selected 14 Pioneer areas from a round of competitive applications, having being identified as the "most ambitious and visionary" in their plans for health and social care integration.[2] Each Pioneer was given access to support and expertise over a five-year period and a one-off fund of £90,000 to help with initial development. A second wave of 11 Pioneer areas was subsequently announced in January 2015. These are excluded from the present analysis as there are insufficient follow up time points available currently for an interpretable trend analysis.

The specific interventions to be implemented were not prescribed but the Pioneers broadly shared the same vision for the future of the health and social care system by seeking to create a 'whole system' of integrated care involving all local bodies and professional groups organised around the needs of individuals and their informal carers.[3]

Many of the Pioneers planned to focus on older people, people with multiple long term conditions, people at high risk of hospitalisation and families with complex care needs. A number of Pioneers aimed to reduce reliance on emergency hospital care by introducing preventive strategies to avoid the need for acute hospitalisation. Such strategies offered the hope of better quality care and experiences for patients, and potentially the better use of limited resources by reducing the costs of what was perceived to be more expensive hospital care. The focus on reducing emergency use of hospital care was given greater emphasis in the Pioneers' plans as financial austerity bit more deeply into local health care budgets after 2013.[4]

As a consequence of the focus on emergency hospital care, the success of integrated care initiatives has often been presented, at least in part, in terms of the ability to reduce the need for emergency hospital admissions and to reduce emergency admission rates.[5] Reducing emergency admission rates has been a feature of English health policy over the past decade

1  
2  
3 and continues to be one of the most commonly used measures of success.[6–8] To date,  
4 however, there has been little evidence of initiatives successfully reducing emergency  
5 admissions.[9–11]  
6  
7  
8

9  
10 In this paper, we investigate whether emergency admissions among the first wave Pioneers  
11 diverged from rates in other parts of England using a difference-in-differences approach.  
12 Though the causality may be unclear in terms of which elements of the programme, if any,  
13 led to any differential change observed, such an analysis can be justified as a necessary step  
14 in understanding the impacts of a major initiative such as the integrated care Pioneer  
15 programme. The underlying hypothesis is that the cumulative effect of the specific initiatives  
16 embedded in each Pioneer programme would bring about sufficient change in emergency  
17 hospital care use that it would be detectable at the level of the whole population of the  
18 Pioneers. The analysis is part of a wider programme of evaluation of the Pioneers  
19 ([http://piru.lshtm.ac.uk/projects/current-projects/integrated-care-pioneers-](http://piru.lshtm.ac.uk/projects/current-projects/integrated-care-pioneers-evaluation.html)  
20 [evaluation.html](http://piru.lshtm.ac.uk/projects/current-projects/integrated-care-pioneers-evaluation.html)).  
21  
22  
23  
24  
25  
26  
27  
28  
29

## 30 **METHODS**

31  
32  
33 To examine whether differential change in emergency admissions could be attributed to  
34 Pioneer status a difference-in-differences approach was used. This compared time series data  
35 on NHS hospital emergency admission rates between Pioneer and non-Pioneer local authority  
36 populations from a baseline period of 2010/11-2012/13 to two follow-up periods: 2014/15  
37 and 2015/16. Difference-in-differences measures the effect of the intervention (the Pioneer  
38 programme) by looking at the change in emergency admissions in the two groups and  
39 quantifies whether or not the population within the Pioneer programme experiences a  
40 change that is significantly different to the comparison group, the non-Pioneers.  
41  
42  
43  
44  
45  
46  
47  
48

### 49 **Defining Pioneer Areas**

50  
51 The Pioneer areas were not based on a consistent set of formal geographies and, in the  
52 absence of data on those who directly benefited from the Pioneers' planned interventions,  
53 an exercise was undertaken to map each Pioneer to the local authorities it covered (see online  
54 supplementary material appendices for lookup table). Many of the Pioneers were based on  
55 clinical commissioning group (CCG) boundaries instead of local authority. In these cases all  
56 the local authorities the CCG overlapped with were included as part of the Pioneer's  
57  
58  
59  
60

1  
2  
3 geographical area. Local authority boundaries were chosen instead of CCG because the time  
4 series of population estimates available for local authorities is longer.  
5  
6

7  
8 The local authorities which were linked to the second wave of Pioneers, initiated in January  
9 2015, were excluded from all analyses and not included in either the Pioneer or non-Pioneer  
10 populations.  
11  
12

### 13 14 **Data Sources and Preparation**

15  
16 The analysis used inpatient Hospital Episode Statistics (HES) collated by NHS Digital.[12] HES  
17 is a pseudonymous patient level dataset that records basic features of admissions to hospital  
18 including a field that indicates an emergency admission (admission methods starting with  
19 "2"). The numbers of emergency admissions for individual years 2007/08 to 2015/16 were  
20 calculated by summing the number of completed spells in hospital (period from admission to  
21 discharge) by local authority of residence, age group (0-19, 20-39, 40-59, 60-79, 80+) and sex.  
22 Emergency admission rates were calculated as the total number of emergency admissions  
23 divided by the mid-year population estimate for each local authority obtained from the Office  
24 for National Statistics (ONS).[13] For the rates, the emergency admissions were directly  
25 standardised using the age and sex structure of the 2015 mid-year population estimates for  
26 England. A baseline of the average of the emergency admissions in the financial years 2010/11  
27 to 2012/13 was created as the period before the initiation of the Pioneer programme in late  
28 2013. Local authority-level deprivation decile was taken from the Index of Multiple  
29 Deprivation 2015.[14]  
30  
31  
32  
33  
34  
35  
36  
37  
38  
39  
40  
41  
42

### 43 **Statistical Analysis**

44  
45 To get an understanding of the similarity between the Pioneer and non-Pioneer populations,  
46 baseline emergency admissions and demographics of the two populations were examined.  
47 The emergency admission rates for the Pioneers and non-Pioneers were compared  
48 graphically over the period prior to the initiation of the programme (from 2007/08 to  
49 2012/13) to assess whether the trends were parallel and suitable for difference-in-differences  
50 analysis.  
51  
52  
53  
54  
55

56  
57 A crude difference in difference comparison was performed by looking at the change in the  
58 emergency admission rate for the Pioneers and non-Pioneers. Percentage differences  
59  
60



1  
2  
3 between the baseline period and the two follow up points of 2014/15 and 2015/16 were  
4 calculated.  
5  
6

7  
8 To determine whether the change in emergency admissions in the Pioneers was significantly  
9 different from the change in the non-Pioneers, we performed difference-in-differences  
10 regression analysis, using a negative binomial regression model. We deemed a Poisson model  
11 for count data not suitable because the emergency admission data were over-dispersed. A  
12 count of emergency admissions in each local authority was used as the dependent variable.  
13 To model the emergency admissions counts as a rate, an offset of the log of the population  
14 size in each local authority was incorporated into the model. The independent variables were  
15 Pioneer status (Pioneer/non-Pioneer), time (baseline/follow-up time point of either 2014/15  
16 or 2015/16) and an interaction term of Pioneer status\*time. The interaction term provides  
17 the model coefficient to differentiate whether or not the difference in the differences in  
18 emergency admissions between the two groups is statistically significant. The model  
19 accounted for the repeated measures from each local authority and was adjusted for  
20 population age group, sex and area-level deprivation.  
21  
22  
23  
24  
25  
26  
27  
28  
29  
30

31  
32 SAS 9.4® was used for all analyses.  
33  
34

### 35 **Patient and Public Involvement**

36  
37 Patients were not involved in the design or interpretation of this particular analysis since it  
38 is entirely reliant on routine data. However, patient and public representatives are involved  
39 in the wider evaluation of which this analysis forms a part and were involved in the selection  
40 and peer review of the initial proposal on which this analysis is based.  
41  
42  
43  
44

## 45 **RESULTS**

### 46 **Baseline Characteristics**

47  
48 The characteristics of the Pioneers and non-Pioneers during the baseline period of 2010/11  
49 to 2012/13 are summarised in Table 1. The Pioneers were made up of 49 local authorities,  
50 which encompassed 17 percent of the English population in 2015, with a higher average local  
51 authority population size than non-Pioneers.[13] The proportions of the population aged 65  
52 and over, or female, were similar between the two groups; area-level deprivation in the  
53  
54  
55  
56  
57  
58  
59  
60

Pioneers was slightly higher. At baseline, the Pioneers had a higher emergency hospital admission rate than the non-Pioneers.

Table 1 Baseline Characteristics of the Pioneer and non-Pioneer populations

| Characteristic                                                        | Pioneers       | Non-Pioneers   |
|-----------------------------------------------------------------------|----------------|----------------|
| Number of Local Authorities                                           | 49             | 244            |
| Number of Pioneer Areas                                               | 14             | -              |
| Total Population                                                      | 9,083,051      | 37,137,613     |
| <i>Population Per Local Authority</i>                                 | <i>185,368</i> | <i>152,203</i> |
| Proportion Population Under 20                                        | 24%            | 24%            |
| Proportion Population Aged 65+                                        | 16%            | 17%            |
| Proportion Population Female                                          | 50%            | 50%            |
| Average IMD Score                                                     | 22.8           | 20.7           |
| Total Emergency Admissions                                            | 878,855        | 3,578,799      |
| <i>Emergency Admissions Per Local Authority</i>                       | <i>17,934</i>  | <i>14,667</i>  |
| Crude Emergency Admission Rate Per 100,000 Population                 | 9,676          | 9,637          |
| Directly Standardised Emergency Admission Rate Per 100,000 Population | 10,013         | 9,705          |

### Trend Analysis

Figure 1 shows the emergency admission rates for the Pioneers and non-Pioneers Between 2007/08 and 2012/13. The trends seem close to parallel, with Pioneers consistently having a higher emergency admission rate, indicating limited trends bias in our difference-in-differences analysis.

### Crude Change

The change in the unadjusted emergency admission rate between the baseline period and 2014/15 was less for the Pioneers than the non-Pioneers (see Table 2). On average, the Pioneers had a decrease of 0.22 per cent in the emergency admission rate between baseline and 2014/15 compared to an increase of 3.43 per cent for the non-Pioneers, with difference-in-differences of 3.65%. The estimated effects of the Pioneers was not as large over a longer time period, with difference-in-differences at 3.30% in 2015/16.

Table 2 Emergency admission rates for Pioneers and Non-Pioneers at baseline and follow up, with percentage differences compared to baseline and difference in difference between non Pioneer and Pioneer

|             | Emergency Admission Rate<br>(per 100,000 population) |         |         | Percentage Difference |         | Difference-in-Differences* |         |
|-------------|------------------------------------------------------|---------|---------|-----------------------|---------|----------------------------|---------|
|             | Baseline                                             | 2014/15 | 2015/16 | 2014/15               | 2015/16 | 2014/15                    | 2015/16 |
| Non-Pioneer | 9,705                                                | 10,038  | 10,402  | 3.43%                 | 7.18%   | 3.65                       | 3.30    |

|         |        |       |        |        |       |  |  |
|---------|--------|-------|--------|--------|-------|--|--|
| Pioneer | 10,013 | 9,991 | 10,402 | -0.22% | 3.88% |  |  |
|---------|--------|-------|--------|--------|-------|--|--|

\* *Difference between the non-Pioneer and Pioneer percentage difference, positive value*

*indicates non-Pioneer change is greater*

It is important to note that trends for the individual Pioneers varied. For example, eight of the fourteen Pioneers had an increase in the emergency admission rate between baseline and 2014/15, while the percentage difference for the Pioneers as a whole was a slight decrease (see Table 3). There was also variation within Pioneers (see online supplementary material appendices for table); for example, the constituent local authorities comprising the Waltham Forest, East London and City Pioneer had declines in emergency admission rates ranging from -12.5% (Tower Hamlets) to -0.4% (Newham) between baseline and 2014/15.

Table 3 Emergency admission rates for individual pioneers at baseline and follow up, with percentage differences compared to baseline

| Pioneer (Number of LAs)                  | Emergency Admission Rate<br>(per 100,000 population) |         |         | Percentage<br>Difference |         |
|------------------------------------------|------------------------------------------------------|---------|---------|--------------------------|---------|
|                                          | Baseline†                                            | 2014/15 | 2015/16 | 2014/15                  | 2015/16 |
| Barnsley (1)                             | 11,873                                               | 12,942  | 13,667  | 9.01%                    | 15.12%  |
| Cheshire (2)                             | 10,160                                               | 10,912  | 11,303  | 7.40%                    | 11.24%  |
| Cornwall and Isles of Scilly (2)         | 9,001                                                | 8,747   | 9,081   | -2.83%                   | 0.89%   |
| Greenwich (1)                            | 9,536                                                | 9,661   | 11,382  | 1.31%                    | 19.36%  |
| Islington (1)                            | 11,397                                               | 11,607  | 11,219  | 1.85%                    | -1.56%  |
| Kent (12)                                | 9,204                                                | 9,797   | 10,017  | 6.44%                    | 8.83%   |
| Leeds (1)                                | 11,900                                               | 9,848   | 10,728  | -17.24%                  | -9.84%  |
| North West London (8)                    | 10,306                                               | 10,125  | 10,416  | -1.76%                   | 1.07%   |
| South Devon and Torbay (3)               | 8,668                                                | 9,013   | 10,597  | 3.98%                    | 22.26%  |
| South Tyneside (1)                       | 12,670                                               | 11,873  | 13,325  | -6.29%                   | 5.17%   |
| Southend (1)                             | 9,506                                                | 10,735  | 10,797  | 12.93%                   | 13.58%  |
| Stoke and North Staffordshire (7)        | 10,856                                               | 11,118  | 11,830  | 2.42%                    | 8.97%   |
| Waltham Forest, East London and City (3) | 12,367                                               | 11,684  | 11,041  | -5.52%                   | -10.72% |
| Worcestershire (6)                       | 8,633                                                | 8,429   | 8,919   | -2.37%                   | 3.31%   |

†Averaged emergency admission rate for 2010/11 – 2012/13

### Difference-in-Differences Regression

After adjusting for age, sex and area-level deprivation, our difference-in-differences regression analysis found the change in emergency admission rates for the Pioneers between baseline and 2014/15 was smaller and significantly different from that of the non-Pioneers ( $p=0.0161$ ) (see Table 4). The Pioneer emergency admission rate increased by 1.42 per cent

compared to 4.44 per cent in the non-Pioneers. When comparing baseline and 2015/16, the analysis still indicated that the change in emergency admissions for the Pioneers was smaller at 4.97 per cent compared to 7.65 percent for the non-Pioneers but the difference was not statistically significant ( $p=0.1272$ ) (see online supplementary material appendices for full model results).

Table 4 Difference in difference model coefficients and calculated percentage difference in emergency admissions for Pioneers and Non-Pioneers, adjusted for age, sex and area-level deprivation

|                                                        | 2014/15           | 2015/16           |
|--------------------------------------------------------|-------------------|-------------------|
| <b>Model Coefficients (p value)</b>                    |                   |                   |
| Intercept                                              | -2.4597 (<0.0001) | -2.5102 (<0.0001) |
| Non-Pioneer/Pioneer                                    | -0.0038 (0.8352)  | -0.0035 (0.8466)  |
| Baseline/Time 2                                        | 0.0435 (<0.0001)  | 0.0737 (<0.0001)  |
| Interaction                                            | -0.0293 (0.0161)  | -0.0252 (0.1272)  |
| <b>Percentage Difference [95% confidence interval]</b> |                   |                   |
| Non-Pioneer                                            | 4.44 [3.43,5.47]  | 7.65 [6.49,8.83]  |
| Pioneer                                                | 1.42 [-0.77,3.66] | 4.97 [1.81,8.23]  |

## DISCUSSION

The Integrated Care Pioneers represent one important example of how English health and care services have been exploring new ways of working across organisational boundaries. The aims of the individual Pioneers varied,<sup>[4]</sup> but most had a common interest in providing care and support that was intended to reduce the need for urgent care services and lead to a reduction in emergency hospital admissions. After comparing changes in emergency admissions from a 3-year pre-Pioneer baseline period between Pioneer populations and non-Pioneer populations, we found that, despite higher emergency admission rates in the baseline period, the increase in emergency admission rates was lower for the Pioneers than the non-Pioneers. This lower increase was statistically significant for the comparison between baseline and 2014/15 ( $p=0.0161$ ) but not for the comparison between baseline and 2015/16 ( $p=0.1272$ ).

This type of population level analysis can help provide some independent evidence of the likely scale of changes within an area associated with integrated care initiatives and curb some of the more zealous rhetoric for or against integrated health and social care and related

1  
2  
3 changes in service delivery. Looking at emergency admission data on this scale means the  
4 outcome of interest is based on a relatively large number of events and the data are collected  
5 continuously – making them useful as a measure of potential programme impact. This is in  
6 contrast to a range of other potential measures of health and social care integration at  
7 community level that are less sensitive to short term change such as annual patient  
8 experience surveys. The size and range of geographical areas covered by both the Pioneers  
9 and non-Pioneers should mean that differences in factors such as supply of social care services  
10 or acute hospital beds and the process of collecting data are unlikely to be systematically  
11 different between the two groups beyond any changes associated with Pioneer status.  
12  
13  
14  
15  
16  
17  
18  
19

20  
21 In addition to the introduction of the Pioneer programme, there have been subsequent  
22 parallel changes in the wider policy context both in terms of specific health policies such as  
23 the Better Care Fund,[15] the overall level of funding for both health and social care in a  
24 period of unprecedented financial austerity and,[16] from 2014 onwards, the New Care  
25 Model Vanguard, arising from the strategic directions set out in the Five Year Forward  
26 View.[17] This means that the ideas behind integration that prompted the Pioneers and the  
27 types of interventions that have been developed are no longer (if they ever were) unique to  
28 these areas and are being implemented across the country. Therefore, a true counter-factual  
29 population is difficult to find. This may in part explain why the difference between the  
30 Pioneers and non-Pioneers reduced between baseline and 2015/16 compared with baseline  
31 and 2014/15 as the behaviour of the non-Pioneers becomes increasingly similar to the  
32 Pioneers.[18]  
33  
34  
35  
36  
37  
38  
39  
40  
41  
42  
43

44 A more detailed understanding of the impacts of the Pioneers would be gained by a more  
45 targeted analytical approach using information on the specific initiatives implemented in each  
46 Pioneer and data on the exact populations in receipt of these initiatives (this is being  
47 attempted in another component of the Pioneer evaluation). While this might yield gains in  
48 terms of causal inference in that changes could potentially be attributed to a specific set of  
49 local actions, such an analysis might lose the ability to describe the totality of change across  
50 a system and an entire population. This is important to note as the Pioneers were intended  
51 to be a complex mix of specific service changes and initiatives, supported by a wider pattern  
52 of infrastructural changes at the level of the local health and social care system. As Erens and  
53 colleagues noted *“What it meant to be ‘a Pioneer’ varied between sites and between*  
54  
55  
56  
57  
58  
59  
60

1  
2  
3 *individuals within sites. At various times it was apparent that Pioneer status meant one or*  
4 *more of the following:*

- 5  
6  
7
- 8 • *a ‘badge’ for a locality signifying national recognition of innovation and progress in*  
9 *integrating care*
  - 10
  - 11 • *an enabler of the existing local plan for transformation*
  - 12
  - 13 • *a particular governance arrangement, for example a Board that brought all system leaders*  
14 *and their organisations around the table*
  - 15
  - 16 • *a collection of discrete workstreams, characteristically covering a combination of different*  
17 *groups of users and infrastructure projects (for example, information sharing, workforce*  
18 *development, etc.)*
  - 19
  - 20 • *a specific new integrated service, such as a frailty service*
  - 21
  - 22 • *an ethos or way of thinking about and providing care, rather than a specific plan or set of*  
23 *initiatives”[4]*
  - 24
  - 25
  - 26
  - 27
  - 28

29 Other studies have looked at schemes with an aspiration to reduce the need for urgent  
30 hospital care through better coordinated health and care services, and with an emphasis on  
31 preventing admissions. Success is typically assessed in terms of reduction in emergency  
32 hospital admissions and various previous evaluations show that this has been difficult to  
33 achieve.[9–11] Despite the intense policy interest in how different forms of service delivery  
34 can reduce emergency admissions, there are few, if any, unequivocal success stories. Against  
35 this backdrop, the modest changes observed across the 14 wave one Pioneer areas in their  
36 first two years look promising. However, when exploring the extent to which the observed  
37 changes are likely to be related causally to Pioneer status, it should be noted that:

- 38
- 39 a. the effect appears to be temporary: and as such the effect may have been linked  
40 to changes that took place in the early stages of the Pioneers but were not  
41 sustained; or the non-Pioneer areas introduced changes which have subsequently  
42 reduced the difference between them and the Pioneers; and
  - 43 b. the changes in emergency admissions were not shown in all places and even varied  
44 between local authority areas within the same Pioneer.
- 45  
46  
47  
48  
49  
50  
51  
52  
53  
54  
55  
56  
57  
58  
59  
60

## Conclusion

It is ambitious to expect unequivocal changes in a single high level and indirect indicator of care integration such as emergency hospital admissions to arise as a result of changes in local health and care provision across organisations brought about by the Pioneers in their early years and we should treat any claims that the Pioneers have had such an impact with caution. Nevertheless, there does seem to be some evidence from the current analysis that there were some changes in hospital use associated with the first year of Pioneer status that are worthy of further exploration. At the very least, this analysis shows that Pioneer status does not seem to have been associated with a relative deterioration in performance in terms of emergency hospital use.

## FIGURE LEGEND

Figure 1 Emergency admissions for Pioneers and Non-Pioneers, directly standardised rates per 100,000 standard population (baseline years as shaded area)

## AUTHOR CONTRIBUTIONS

EK undertook the analysis and with MB drafted the initial paper. MB and NM contributed to design of the study. EK, MB, MA, TH and NM contributed to interpretation of findings and revisions of the paper.

## ACKNOWLEDGEMENTS

This work uses data provided by patients and collected by the NHS as part of their care and support. Read more at <https://www.nuffieldtrust.org.uk/about/corporate-policies#information-security-and-data>.

Hospital Episode Statistics data (year range 2007/08–2015/16) Copyright © (2018), NHS Digital. Re-used with the permission of NHS Digital. All rights reserved.

## FUNDING

This work was supported by the NIHR Policy Research Programme, *Evaluation of the Integrated Care and Support Pioneers Programme in the context of new funding*

1  
2  
3 *arrangements for integrated care in England (2015-2020)*, PR-R10-0514-25001. The views  
4 expressed in the publication are those of the authors and are not necessarily those of the  
5 NHS, the NIHR, the Department of Health and Social Care, its arm's length bodies or other  
6 Government Departments.  
7  
8  
9  
10  
11  
12  
13  
14  
15  
16  
17  
18  
19  
20  
21  
22  
23  
24  
25  
26  
27  
28  
29  
30  
31  
32  
33  
34  
35  
36  
37  
38  
39  
40  
41  
42  
43  
44  
45  
46  
47  
48  
49  
50  
51  
52  
53  
54  
55  
56  
57  
58  
59  
60

For peer review only



**REFERENCES**

- [1] NHS England. Integrated care pioneers announced. 2013. Available: <https://www.england.nhs.uk/2013/11/interg-care-pioneers/>. [Accessed: 01-Aug-2018].
- [2] Department of Health. Letter inviting expressions of interest for health and social care integration "Pioneers". 2013. Available: <https://www.gov.uk/government/publications/social-care-integration-pioneers>. [Accessed: 01-Aug-2018].
- [3] National Collaboration for Integrated Care and Support. Integrated Care and Support: Our Shared Commitment. 2013. Available: [https://assets.publishing.service.gov.uk/government/uploads/system/uploads/attachment\\_data/file/198748/DEFINITIVE\\_FINAL\\_VERSION\\_Integrated\\_Care\\_and\\_Support\\_-\\_Our\\_Shared\\_Commitment\\_2013-05-13.pdf](https://assets.publishing.service.gov.uk/government/uploads/system/uploads/attachment_data/file/198748/DEFINITIVE_FINAL_VERSION_Integrated_Care_and_Support_-_Our_Shared_Commitment_2013-05-13.pdf). [Accessed: 01-Aug-2018].
- [4] Erens B, Wistow G, Mournier-Jack S, et al. Early evaluation of Integrated Care and Support Pioneers Programme: Final Report. Policy Innovation Research Unit. 2015. Available: [http://piru.lshtm.ac.uk/assets/files/Early\\_evaluation\\_of\\_IC\\_Pioneers\\_Final\\_Report.pdf](http://piru.lshtm.ac.uk/assets/files/Early_evaluation_of_IC_Pioneers_Final_Report.pdf). [Accessed: 01-Aug-2018].
- [5] Raleigh V, Bardsley M, Smith P, et al. Integrated care and support Pioneers: Indicators for measuring the quality of integrated care: Final report. Policy Innovation Research Unit. 2014. Available: [http://piru.lshtm.ac.uk/assets/files/IC\\_and\\_support\\_Pioneers-Indicators.pdf](http://piru.lshtm.ac.uk/assets/files/IC_and_support_Pioneers-Indicators.pdf). [Accessed: 01-Aug-2018].
- [6] National Audit Office. Emergency admissions to hospital: managing the demand. National Audit Office. 2013. Available: <https://www.nao.org.uk/wp-content/uploads/2013/10/10288-001-Emergency-admissions.pdf>. [Accessed: 01-Aug-2018].
- [7] Wallace E, Smith SM, Fahey T, et al. Reducing emergency admissions through community based interventions. *BMJ* 2016;352:h6817 doi:10.1136/bmj.h6817 [published Online first: 28 January 2016].
- [8] Lloyd T, Wolters A, Steventon A. The impact of providing enhanced support for care home residents in Rushcliffe. The Health Foundation. 2017. Available: <https://www.health.org.uk/publication/impact-enhanced-support-rushcliffe>. [Accessed: 01-Aug-2018].

- 1  
2  
3 [9] Bardsley M, Steventon A, Smith J, et al. Evaluating integrated and community-based  
4 care: How do we know what works? The Nuffield Trust. 2013. Available:  
5 [https://www.nuffieldtrust.org.uk/files/2017-01/evaluating-integrated-community-](https://www.nuffieldtrust.org.uk/files/2017-01/evaluating-integrated-community-care-web-final.pdf)  
6 [care-web-final.pdf](https://www.nuffieldtrust.org.uk/files/2017-01/evaluating-integrated-community-care-web-final.pdf). [Accessed: 01-Aug-2018].  
7  
8  
9  
10 [10] Roland M, Lewis R, Steventon A, et al. Case management for at-risk elderly patients in  
11 the English integrated care pilots: observational study of staff and patient experience  
12 and secondary care utilisation. *Int J Integr Care* 2012;12(5)  
13 <http://doi.org/10.5334/ijic.850>.  
14  
15  
16 [11] Purdy S, Paranjothy S, Huntley A, et al. Interventions to reduce unplanned hospital  
17 admission: a series of systematic reviews. National Institute for Health Research. 2012.  
18 Available: [http://www.bristol.ac.uk/media-](http://www.bristol.ac.uk/media-library/sites/primaryhealthcare/migrated/documents/unplannedadmissions.pdf)  
19 [library/sites/primaryhealthcare/migrated/documents/unplannedadmissions.pdf](http://www.bristol.ac.uk/media-library/sites/primaryhealthcare/migrated/documents/unplannedadmissions.pdf).  
20 [Accessed: 01-Aug-2018].  
21  
22  
23 [12] NHS Digital. Hospital Episode Statistics data 2007/08-2015/16.  
24  
25  
26 [13] Office for National Statistics. Population estimates 2007-2015. Available:  
27 [https://www.ons.gov.uk/peoplepopulationandcommunity/populationandmigration/po-](https://www.ons.gov.uk/peoplepopulationandcommunity/populationandmigration/populationestimates)  
28 [pulationestimates](https://www.ons.gov.uk/peoplepopulationandcommunity/populationandmigration/populationestimates). [Accessed: 14-May-2018].  
29  
30  
31 [14] Ministry of Housing, Communities and Local Government. English indices of  
32 deprivation 2015. Available: [https://www.gov.uk/government/statistics/english-](https://www.gov.uk/government/statistics/english-indices-of-deprivation-2015)  
33 [indices-of-deprivation-2015](https://www.gov.uk/government/statistics/english-indices-of-deprivation-2015). [Accessed: 12-Jun-2018].  
34  
35  
36 [15] NHS England. Better Care Fund. Available: [https://www.england.nhs.uk/ourwork/part-](https://www.england.nhs.uk/ourwork/part-rel/transformation-fund/bcf-plan/)  
37 [rel/transformation-fund/bcf-plan/](https://www.england.nhs.uk/ourwork/part-rel/transformation-fund/bcf-plan/). [Accessed: 14-May-2018].  
38  
39  
40 [16] Robertson R, Wenzel L, Thompson J, et al. Understanding NHS financial pressures: How  
41 are they affecting patient care? The Kings Fund. 2017.  
42  
43  
44 [17] NHS. NHS Five Year Forward View. 2014. Available: [https://www.england.nhs.uk/wp-](https://www.england.nhs.uk/wp-content/uploads/2014/10/5yfv-web.pdf)  
45 [content/uploads/2014/10/5yfv-web.pdf](https://www.england.nhs.uk/wp-content/uploads/2014/10/5yfv-web.pdf). [Accessed: 01-Aug-2018].  
46  
47  
48 [18] Chen YF, Hemming K, Stevens AJ, et al. Secular trends and evaluation of complex  
49 interventions: the rising tide phenomenon. *BMJ Qual Saf* 2016;25(5)303–310 doi:  
50 [10.1136/bmjqs-2015-004372](https://doi.org/10.1136/bmjqs-2015-004372) [published Online first: 06 Oct 2015].  
51  
52  
53  
54  
55  
56  
57  
58  
59  
60

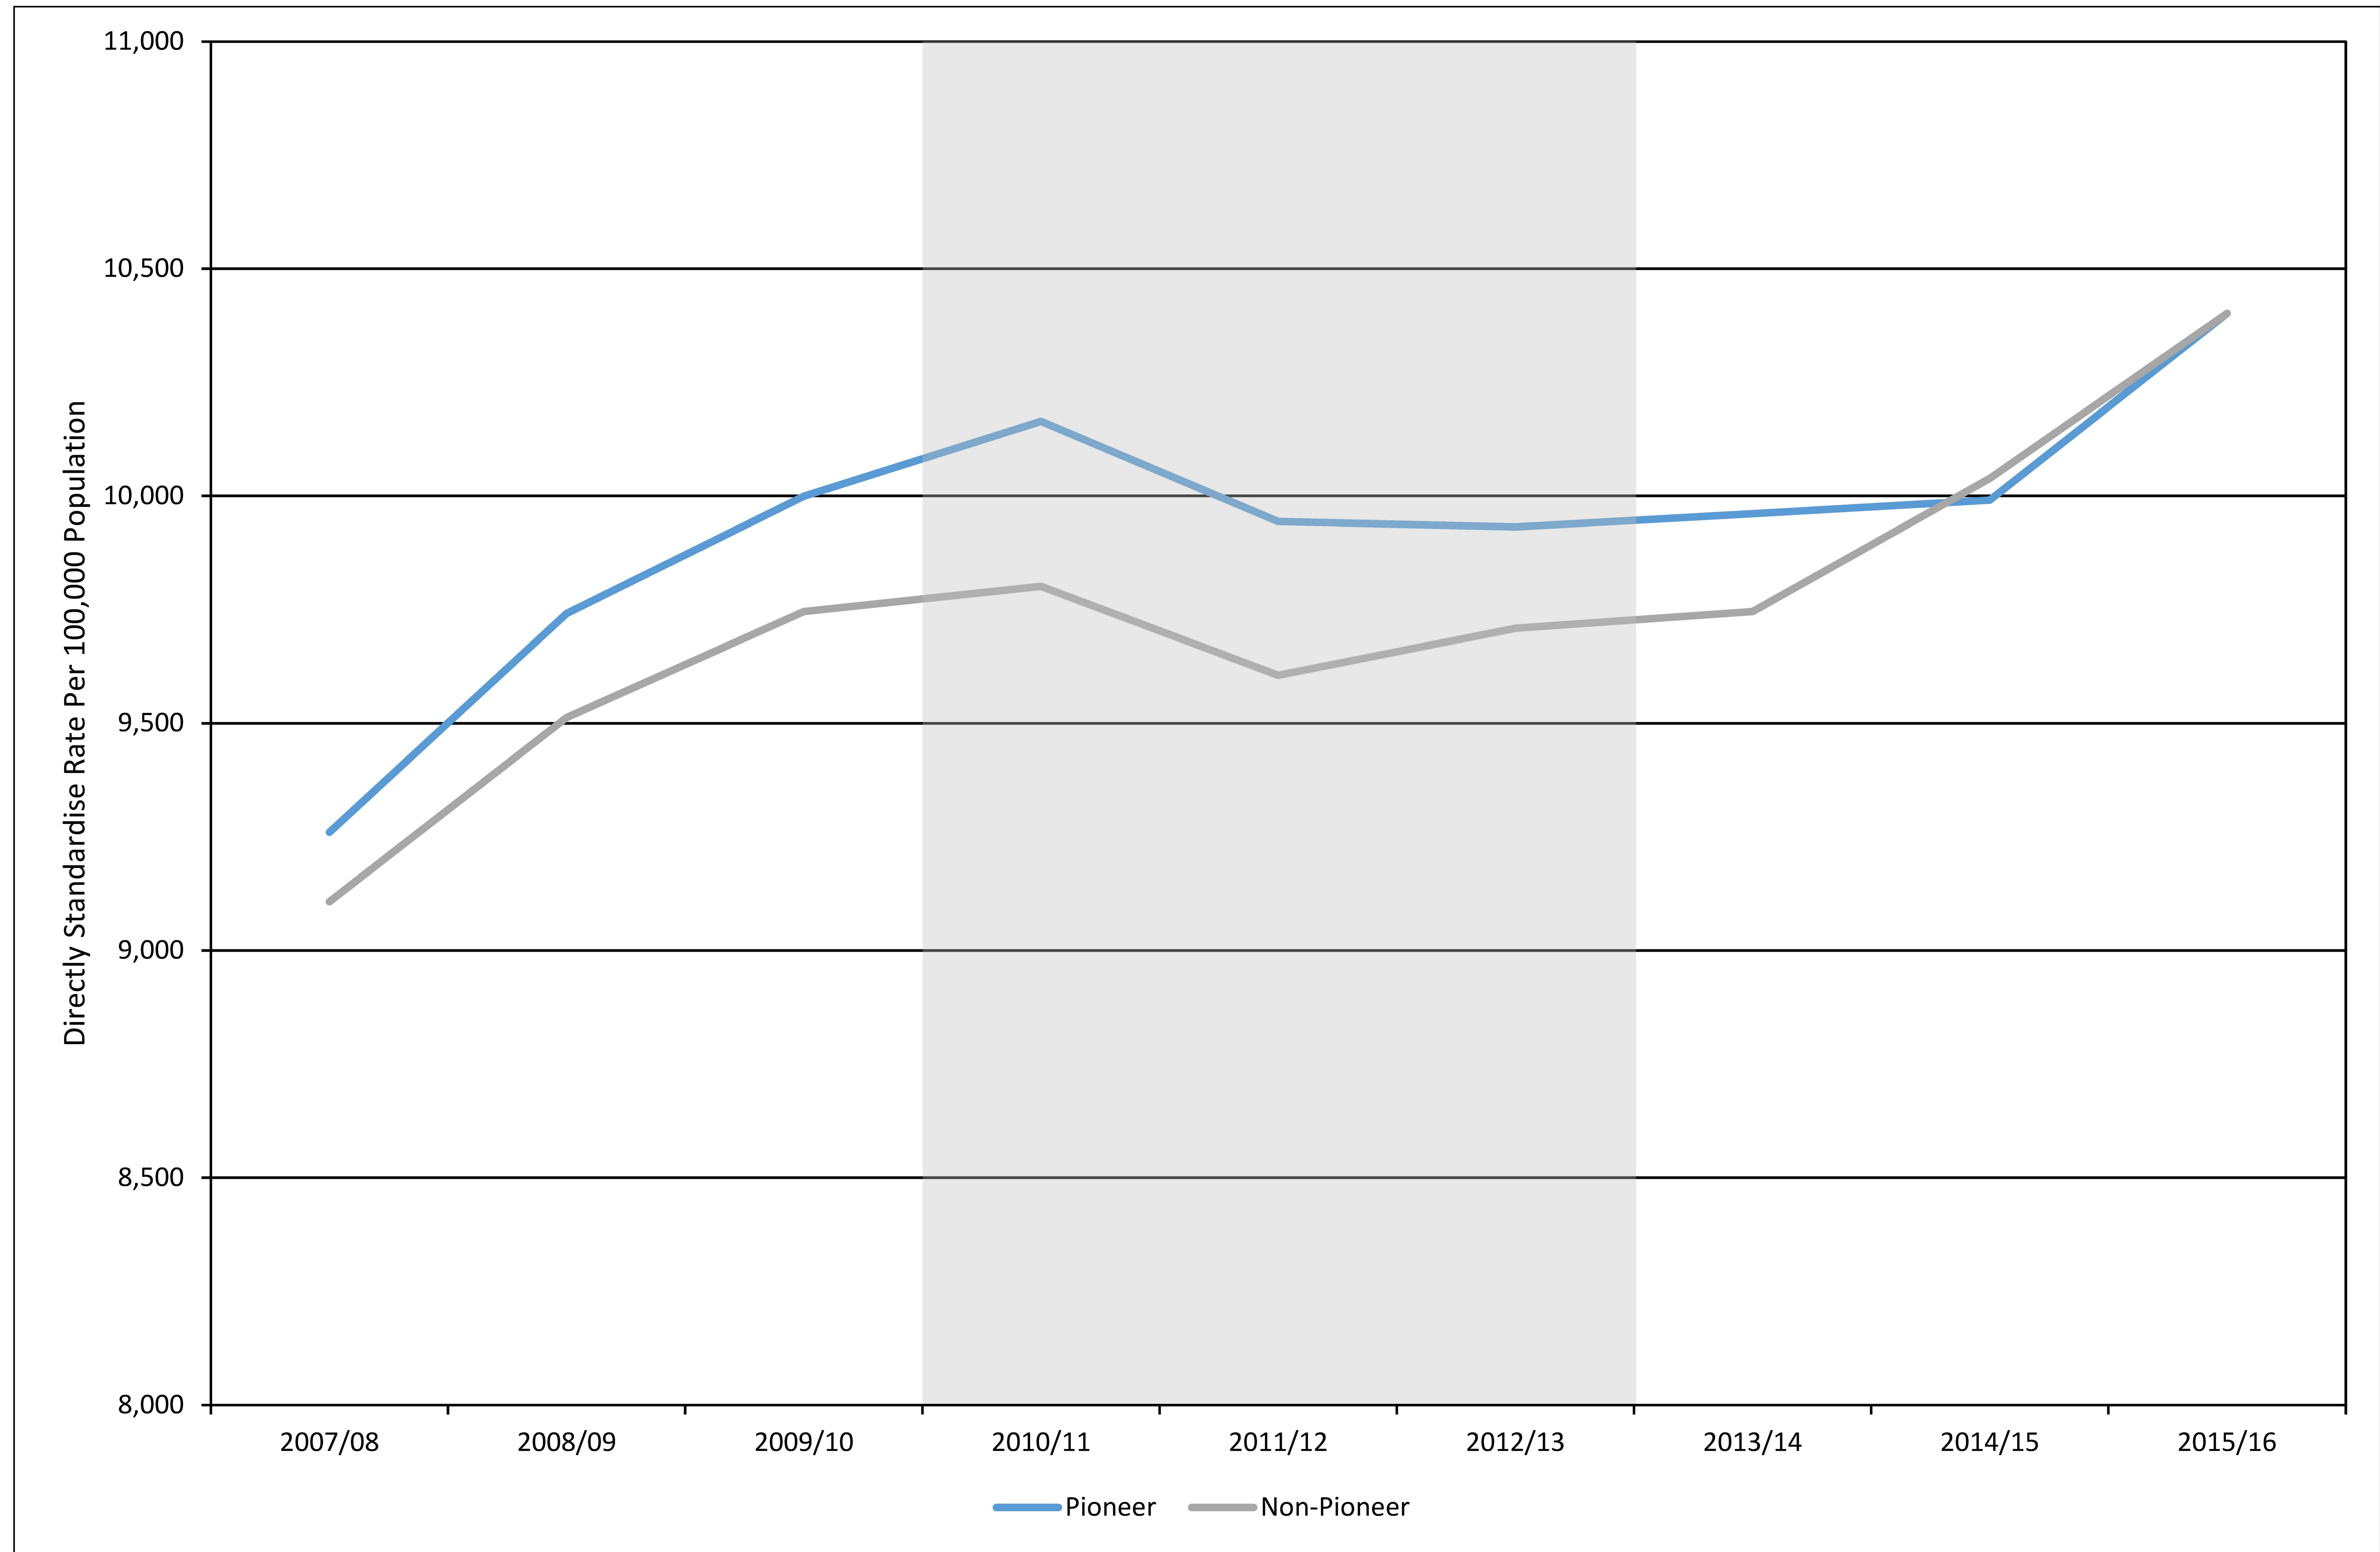

## SUPPLEMENTARY MATERIAL

1. Local Authority to Pioneer Lookup
2. Emergency admission rates for individual local authorities within Pioneers
3. Difference-in-differences baseline and 2014/15 full model coefficients
4. Difference-in-differences baseline and 2015/16 full model coefficients

### 1. Local Authority to Pioneer Lookup

| Local Authority Code | Local Authority           | Pioneer                       |
|----------------------|---------------------------|-------------------------------|
| E08000016            | Barnsley                  | Barnsley                      |
| E06000050            | Cheshire West and Chester | Cheshire                      |
| E06000049            | Cheshire East             | Cheshire                      |
| E06000052            | Cornwall                  | Cornwall and Isles of Scilly  |
| E06000053            | Isles of Scilly           | Cornwall and Isles of Scilly  |
| E09000011            | Greenwich                 | Greenwich                     |
| E09000019            | Islington                 | Islington                     |
| E07000105            | Ashford                   | Kent                          |
| E07000106            | Canterbury                | Kent                          |
| E07000107            | Dartford                  | Kent                          |
| E07000108            | Dover                     | Kent                          |
| E07000109            | Gravesham                 | Kent                          |
| E07000110            | Maidstone                 | Kent                          |
| E07000111            | Sevenoaks                 | Kent                          |
| E07000112            | Shepway                   | Kent                          |
| E07000113            | Swale                     | Kent                          |
| E07000114            | Thanet                    | Kent                          |
| E07000115            | Tonbridge and Malling     | Kent                          |
| E07000116            | Tunbridge Wells           | Kent                          |
| E08000035            | Leeds                     | Leeds                         |
| E09000005            | Brent                     | North West London             |
| E09000009            | Ealing                    | North West London             |
| E09000013            | Hammersmith and Fulham    | North West London             |
| E09000015            | Harrow                    | North West London             |
| E09000017            | Hillingdon                | North West London             |
| E09000018            | Hounslow                  | North West London             |
| E09000020            | Kensington and Chelsea    | North West London             |
| E09000033            | Westminster               | North West London             |
| E06000027            | Torbay                    | South Devon and Torbay        |
| E07000044            | South Hams                | South Devon and Torbay        |
| E07000045            | Teignbridge               | South Devon and Torbay        |
| E08000023            | South Tyneside            | South Tyneside                |
| E06000033            | Southend-on-Sea           | Southend                      |
| E07000192            | Cannock Chase             | Stoke and North Staffordshire |
| E07000194            | Lichfield                 | Stoke and North Staffordshire |

|           |                         |                                         |
|-----------|-------------------------|-----------------------------------------|
| E07000195 | Newcastle-under-Lyme    | Stoke and North Staffordshire           |
| E07000197 | Stafford                | Stoke and North Staffordshire           |
| E07000198 | Staffordshire Moorlands | Stoke and North Staffordshire           |
| E06000021 | Stoke-on-Trent          | Stoke and North Staffordshire           |
| E07000196 | South Staffordshire     | Stoke and North Staffordshire           |
| E09000031 | Waltham Forest          | Waltham Forest and East London and City |
| E09000025 | Newham                  | Waltham Forest and East London and City |
| E09000030 | Tower Hamlets           | Waltham Forest and East London and City |
| E07000234 | Bromsgrove              | Worcestershire                          |
| E07000235 | Malvern Hills           | Worcestershire                          |
| E07000236 | Redditch                | Worcestershire                          |
| E07000237 | Worcester               | Worcestershire                          |
| E07000238 | Wychavon                | Worcestershire                          |
| E07000239 | Wyre Forest             | Worcestershire                          |

## 2. Emergency admission rates for individual local authorities within Pioneers at baseline and follow up, with percentage differences compared to baseline

| Local Authority Code | Local Authority Name             | Emergency Admission Rate |         |         | Percentage Difference |         |
|----------------------|----------------------------------|--------------------------|---------|---------|-----------------------|---------|
|                      |                                  | Baseline                 | 2014/15 | 2015/16 | 2014/15               | 2015/16 |
| E08000016            | Barnsley                         | 11,873                   | 12,942  | 13,667  | 9.0%                  | 15.1%   |
| E06000050            | Cheshire West and Chester        | 10,315                   | 11,047  | 11,403  | 7.1%                  | 10.6%   |
| E06000049            | Cheshire East                    | 10,028                   | 10,806  | 11,231  | 7.8%                  | 12.0%   |
| E06000052            | Cornwall (incl. Isles of Scilly) | 9,001                    | 8,747   | 9,081   | -2.8%                 | 0.9%    |
| E09000011            | Greenwich                        | 9,536                    | 9,661   | 11,382  | 1.3%                  | 19.4%   |
| E09000019            | Islington                        | 11,397                   | 11,607  | 11,219  | 1.8%                  | -1.6%   |
| E07000105            | Ashford                          | 8,598                    | 9,584   | 10,556  | 11.5%                 | 22.8%   |
| E07000106            | Canterbury                       | 10,463                   | 11,335  | 11,470  | 8.3%                  | 9.6%    |
| E07000107            | Dartford                         | 9,776                    | 11,347  | 10,620  | 16.1%                 | 8.6%    |
| E07000108            | Dover                            | 9,152                    | 10,411  | 10,924  | 13.8%                 | 19.4%   |
| E07000109            | Gravesham                        | 9,167                    | 10,389  | 10,113  | 13.3%                 | 10.3%   |
| E07000110            | Maidstone                        | 8,447                    | 9,181   | 9,112   | 8.7%                  | 7.9%    |
| E07000111            | Sevenoaks                        | 8,120                    | 8,500   | 8,210   | 4.7%                  | 1.1%    |
| E07000112            | Shepway                          | 9,220                    | 10,013  | 10,925  | 8.6%                  | 18.5%   |
| E07000113            | Swale                            | 9,341                    | 9,333   | 10,697  | -0.1%                 | 14.5%   |
| E07000114            | Thanet                           | 10,426                   | 11,122  | 11,424  | 6.7%                  | 9.6%    |
| E07000115            | Tonbridge and Malling            | 8,539                    | 8,408   | 8,384   | -1.5%                 | -1.8%   |
| E07000116            | Tunbridge Wells                  | 8,919                    | 7,983   | 7,730   | -10.5%                | -13.3%  |
| E08000035            | Leeds                            | 11,900                   | 9,848   | 10,728  | -17.2%                | -9.8%   |
| E09000005            | Brent                            | 10,371                   | 10,017  | 9,948   | -3.4%                 | -4.1%   |
| E09000009            | Ealing                           | 11,702                   | 11,274  | 12,147  | -3.7%                 | 3.8%    |
| E09000013            | Hammersmith and Fulham           | 12,015                   | 11,358  | 11,770  | -5.5%                 | -2.0%   |
| E09000015            | Harrow                           | 8,769                    | 8,848   | 8,588   | 0.9%                  | -2.1%   |
| E09000017            | Hillingdon                       | 10,906                   | 10,886  | 10,660  | -0.2%                 | -2.2%   |

|           |                         |        |        |        |        |        |
|-----------|-------------------------|--------|--------|--------|--------|--------|
| E09000018 | Hounslow                | 10,316 | 11,358 | 13,250 | 10.1%  | 28.4%  |
| E09000020 | Kensington and Chelsea  | 8,720  | 8,138  | 8,035  | -6.7%  | -7.9%  |
| E09000033 | Westminster             | 9,404  | 8,502  | 8,214  | -9.6%  | -12.7% |
| E06000027 | Torbay                  | 9,497  | 9,948  | 12,322 | 4.7%   | 29.7%  |
| E07000044 | South Hams              | 7,752  | 7,815  | 8,491  | 0.8%   | 9.5%   |
| E07000045 | Teignbridge             | 8,409  | 8,824  | 10,183 | 4.9%   | 21.1%  |
| E08000023 | South Tyneside          | 12,670 | 11,873 | 13,325 | -6.3%  | 5.2%   |
| E06000033 | Southend-on-Sea         | 9,506  | 10,735 | 10,797 | 12.9%  | 13.6%  |
| E07000192 | Cannock Chase           | 10,485 | 10,847 | 10,298 | 3.4%   | -1.8%  |
| E07000194 | Lichfield               | 8,845  | 9,610  | 10,172 | 8.7%   | 15.0%  |
| E07000195 | Newcastle-under-Lyme    | 11,457 | 11,591 | 12,479 | 1.2%   | 8.9%   |
| E07000197 | Stafford                | 10,510 | 10,586 | 10,324 | 0.7%   | -1.8%  |
| E07000198 | Staffordshire Moorlands | 9,120  | 9,288  | 9,956  | 1.8%   | 9.2%   |
| E06000021 | Stoke-on-Trent          | 13,447 | 13,586 | 15,386 | 1.0%   | 14.4%  |
| E07000196 | South Staffordshire     | 8,528  | 9,187  | 10,006 | 7.7%   | 17.3%  |
| E09000031 | Waltham Forest          | 12,123 | 11,577 | 10,288 | -4.5%  | -15.1% |
| E09000025 | Newham                  | 12,379 | 12,336 | 12,118 | -0.4%  | -2.1%  |
| E09000030 | Tower Hamlets           | 12,867 | 11,263 | 10,789 | -12.5% | -16.1% |
| E07000234 | Bromsgrove              | 8,063  | 8,625  | 9,200  | 7.0%   | 14.1%  |
| E07000235 | Malvern Hills           | 7,878  | 7,460  | 7,439  | -5.3%  | -5.6%  |
| E07000236 | Redditch                | 10,601 | 10,642 | 11,822 | 0.4%   | 11.5%  |
| E07000237 | Worcester               | 9,417  | 8,768  | 9,459  | -6.9%  | 0.4%   |
| E07000238 | Wychavon                | 8,255  | 7,923  | 8,305  | -4.0%  | 0.6%   |
| E07000239 | Wyre Forest             | 7,998  | 7,675  | 7,913  | -4.0%  | -1.1%  |

### 3. Difference-in-differences baseline and 2014/15 full model coefficients

| Parameter             | Estimate | Standard Error | 95% Confidence Limits |         | Z      | Pr >  Z |
|-----------------------|----------|----------------|-----------------------|---------|--------|---------|
| Intercept             |          |                |                       |         |        |         |
|                       | -2.4597  | 0.0276         | -2.5138               | -2.4056 | -89.12 | <.0001  |
| Wave                  |          |                |                       |         |        |         |
| Non-Pioneer           | ref      | ref            | ref                   | ref     | ref    | ref     |
| Pioneer               | -0.0038  | 0.0182         | -0.0395               | 0.0319  | -0.21  | 0.8352  |
| Time                  |          |                |                       |         |        |         |
|                       | 0.0435   | 0.0050         | 0.0337                | 0.0532  | 8.75   | <.0001  |
| Interaction Time*Wave |          |                |                       |         |        |         |
|                       | -0.0293  | 0.0122         | -0.0533               | -0.0054 | -2.41  | 0.0161  |
| Age Group             |          |                |                       |         |        |         |
| 00-19                 | ref      | ref            | ref                   | ref     | ref    | ref     |
| 20-39                 | -0.1317  | 0.0116         | -0.1544               | -0.1089 | -11.35 | <.0001  |
| 40-59                 | -0.0570  | 0.0131         | -0.0826               | -0.0313 | -4.35  | <.0001  |

|                                      |         |        |         |         |        |        |
|--------------------------------------|---------|--------|---------|---------|--------|--------|
| 60-79                                | 0.7052  | 0.0150 | 0.6758  | 0.7346  | 47.01  | <.0001 |
| 80+                                  | 1.8660  | 0.0155 | 1.8355  | 1.8964  | 120.09 | <.0001 |
| Sex                                  |         |        |         |         |        |        |
| Male                                 | ref     | ref    | ref     | ref     | ref    | ref    |
| Female                               | -0.0030 | 0.0028 | -0.0085 | 0.0025  | -1.07  | 0.2830 |
| Index of Multiple Deprivation Decile |         |        |         |         |        |        |
| 1                                    | ref     | ref    | ref     | ref     | ref    | ref    |
| 2                                    | -0.1034 | 0.0338 | -0.1696 | -0.0372 | -3.06  | 0.0022 |
| 3                                    | -0.1234 | 0.0349 | -0.1918 | -0.0551 | -3.54  | 0.0004 |
| 4                                    | -0.1731 | 0.0329 | -0.2376 | -0.1086 | -5.26  | <.0001 |
| 5                                    | -0.2294 | 0.0352 | -0.2984 | -0.1603 | -6.51  | <.0001 |
| 6                                    | -0.2203 | 0.0319 | -0.2829 | -0.1577 | -6.90  | <.0001 |
| 7                                    | -0.3115 | 0.0311 | -0.3723 | -0.2506 | -10.03 | <.0001 |
| 8                                    | -0.3164 | 0.0323 | -0.3798 | -0.2531 | -9.79  | <.0001 |
| 9                                    | -0.3794 | 0.0274 | -0.4330 | -0.3257 | -13.87 | <.0001 |
| 10                                   | -0.4324 | 0.0290 | -0.4892 | -0.3756 | -14.92 | <.0001 |

#### 4. Difference-in-differences baseline and 2015/16 full model coefficients

| Parameter             | Estimate | Standard Error | 95% Confidence Limits |         | Z      | Pr >  Z |
|-----------------------|----------|----------------|-----------------------|---------|--------|---------|
| Intercept             |          |                |                       |         |        |         |
|                       | -2.5102  | 0.0280         | -2.5651               | -2.4552 | -89.52 | <.0001  |
| Wave                  |          |                |                       |         |        |         |
| Non-Pioneer           | ref      | ref            | ref                   | ref     | ref    | ref     |
| Pioneer               | -0.0035  | 0.0181         | -0.0389               | 0.0319  | -0.19  | 0.8466  |
| Time                  |          |                |                       |         |        |         |
|                       | 0.0737   | 0.0056         | 0.0628                | 0.0846  | 13.26  | <.0001  |
| Interaction Time*Wave |          |                |                       |         |        |         |
|                       | -0.0252  | 0.0165         | -0.0577               | 0.0072  | -1.53  | 0.1272  |
| Age Group             |          |                |                       |         |        |         |
| 00-19                 | ref      | ref            | ref                   | ref     | ref    | ref     |
| 20-39                 | -0.1454  | 0.0117         | -0.1683               | -0.1225 | -12.45 | <.0001  |
| 40-59                 | -0.0638  | 0.0131         | -0.0894               | -0.0382 | -4.88  | <.0001  |
| 60-79                 | 0.6936   | 0.0149         | 0.6644                | 0.7228  | 46.57  | <.0001  |
| 80+                   | 1.8742   | 0.0155         | 1.8439                | 1.9045  | 121.17 | <.0001  |
| Sex                   |          |                |                       |         |        |         |
| Male                  | ref      | ref            | ref                   | ref     | ref    | ref     |



|                                      |        |         |        |         |         |        |        |
|--------------------------------------|--------|---------|--------|---------|---------|--------|--------|
|                                      | Female | 0.0978  | 0.0031 | 0.0918  | 0.1039  | 31.74  | <.0001 |
| Index of Multiple Deprivation Decile |        |         |        |         |         |        |        |
|                                      | 1      | ref     | ref    | ref     | ref     | ref    | ref    |
|                                      | 2      | -0.0927 | 0.0330 | -0.1573 | -0.0280 | -2.81  | 0.0049 |
|                                      | 3      | -0.1168 | 0.0342 | -0.1838 | -0.0498 | -3.42  | 0.0006 |
|                                      | 4      | -0.1692 | 0.0345 | -0.2368 | -0.1016 | -4.90  | <.0001 |
|                                      | 5      | -0.2203 | 0.0339 | -0.2868 | -0.1538 | -6.49  | <.0001 |
|                                      | 6      | -0.2143 | 0.0316 | -0.2762 | -0.1523 | -6.78  | <.0001 |
|                                      | 7      | -0.3083 | 0.0314 | -0.3699 | -0.2467 | -9.81  | <.0001 |
|                                      | 8      | -0.3066 | 0.0328 | -0.3709 | -0.2422 | -9.33  | <.0001 |
|                                      | 9      | -0.3718 | 0.0272 | -0.4251 | -0.3186 | -13.68 | <.0001 |
|                                      | 10     | -0.4264 | 0.0288 | -0.4828 | -0.3700 | -14.82 | <.0001 |



## STROBE Statement—checklist of items that should be included in reports of observational studies

|                              | Item No | Recommendation                                                                                                                                                                                                                                                                                                                                                                                                                                                         | Page No |
|------------------------------|---------|------------------------------------------------------------------------------------------------------------------------------------------------------------------------------------------------------------------------------------------------------------------------------------------------------------------------------------------------------------------------------------------------------------------------------------------------------------------------|---------|
| <b>Title and abstract</b>    | 1       | (a) Indicate the study's design with a commonly used term in the title or the abstract                                                                                                                                                                                                                                                                                                                                                                                 | 1       |
|                              |         | (b) Provide in the abstract an informative and balanced summary of what was done and what was found                                                                                                                                                                                                                                                                                                                                                                    | 2       |
| <b>Introduction</b>          |         |                                                                                                                                                                                                                                                                                                                                                                                                                                                                        |         |
| Background/rationale         | 2       | Explain the scientific background and rationale for the investigation being reported                                                                                                                                                                                                                                                                                                                                                                                   | 5-6     |
| Objectives                   | 3       | State specific objectives, including any prespecified hypotheses                                                                                                                                                                                                                                                                                                                                                                                                       | 6       |
| <b>Methods</b>               |         |                                                                                                                                                                                                                                                                                                                                                                                                                                                                        |         |
| Study design                 | 4       | Present key elements of study design early in the paper                                                                                                                                                                                                                                                                                                                                                                                                                | 6       |
| Setting                      | 5       | Describe the setting, locations, and relevant dates, including periods of recruitment, exposure, follow-up, and data collection                                                                                                                                                                                                                                                                                                                                        | 6-7     |
| Participants                 | 6       | (a) <i>Cohort study</i> —Give the eligibility criteria, and the sources and methods of selection of participants. Describe methods of follow-up<br><i>Case-control study</i> —Give the eligibility criteria, and the sources and methods of case ascertainment and control selection. Give the rationale for the choice of cases and controls<br><i>Cross-sectional study</i> —Give the eligibility criteria, and the sources and methods of selection of participants | 6-7     |
|                              |         | (b) <i>Cohort study</i> —For matched studies, give matching criteria and number of exposed and unexposed<br><i>Case-control study</i> —For matched studies, give matching criteria and the number of controls per case                                                                                                                                                                                                                                                 | -       |
| Variables                    | 7       | Clearly define all outcomes, exposures, predictors, potential confounders, and effect modifiers. Give diagnostic criteria, if applicable                                                                                                                                                                                                                                                                                                                               | 6-7     |
| Data sources/<br>measurement | 8*      | For each variable of interest, give sources of data and details of methods of assessment (measurement). Describe comparability of assessment methods if there is more than one group                                                                                                                                                                                                                                                                                   | 6-7     |
| Bias                         | 9       | Describe any efforts to address potential sources of bias                                                                                                                                                                                                                                                                                                                                                                                                              | 7-8     |
| Study size                   | 10      | Explain how the study size was arrived at                                                                                                                                                                                                                                                                                                                                                                                                                              | -       |
| Quantitative variables       | 11      | Explain how quantitative variables were handled in the analyses. If applicable, describe which groupings were chosen and why                                                                                                                                                                                                                                                                                                                                           | 7-8     |
| Statistical methods          | 12      | (a) Describe all statistical methods, including those used to control for confounding                                                                                                                                                                                                                                                                                                                                                                                  | 7-8     |
|                              |         | (b) Describe any methods used to examine subgroups and interactions                                                                                                                                                                                                                                                                                                                                                                                                    | -       |
|                              |         | (c) Explain how missing data were addressed                                                                                                                                                                                                                                                                                                                                                                                                                            | -       |
|                              |         | (d) <i>Cohort study</i> —If applicable, explain how loss to follow-up was addressed<br><i>Case-control study</i> —If applicable, explain how matching of cases and controls was addressed<br><i>Cross-sectional study</i> —If applicable, describe analytical methods taking account of sampling strategy                                                                                                                                                              | -       |
|                              |         | (e) Describe any sensitivity analyses                                                                                                                                                                                                                                                                                                                                                                                                                                  | -       |

Continued on next page

| <b>Results</b>           |     |                                                                                                                                                                                                              |       |
|--------------------------|-----|--------------------------------------------------------------------------------------------------------------------------------------------------------------------------------------------------------------|-------|
| Participants             | 13* | (a) Report numbers of individuals at each stage of study—eg numbers potentially eligible, examined for eligibility, confirmed eligible, included in the study, completing follow-up, and analysed            | 9-10  |
|                          |     | (b) Give reasons for non-participation at each stage                                                                                                                                                         | -     |
|                          |     | (c) Consider use of a flow diagram                                                                                                                                                                           | -     |
| Descriptive data         | 14* | (a) Give characteristics of study participants (eg demographic, clinical, social) and information on exposures and potential confounders                                                                     | 9     |
|                          |     | (b) Indicate number of participants with missing data for each variable of interest                                                                                                                          | -     |
|                          |     | (c) <i>Cohort study</i> —Summarise follow-up time (eg, average and total amount)                                                                                                                             | -     |
| Outcome data             | 15* | <i>Cohort study</i> —Report numbers of outcome events or summary measures over time                                                                                                                          | -     |
|                          |     | <i>Case-control study</i> —Report numbers in each exposure category, or summary measures of exposure                                                                                                         | -     |
|                          |     | <i>Cross-sectional study</i> —Report numbers of outcome events or summary measures                                                                                                                           | 9-10  |
| Main results             | 16  | (a) Give unadjusted estimates and, if applicable, confounder-adjusted estimates and their precision (eg, 95% confidence interval). Make clear which confounders were adjusted for and why they were included | 9-11  |
|                          |     | (b) Report category boundaries when continuous variables were categorized                                                                                                                                    | 9-11  |
|                          |     | (c) If relevant, consider translating estimates of relative risk into absolute risk for a meaningful time period                                                                                             | -     |
| Other analyses           | 17  | Report other analyses done—eg analyses of subgroups and interactions, and sensitivity analyses                                                                                                               | -     |
| <b>Discussion</b>        |     |                                                                                                                                                                                                              |       |
| Key results              | 18  | Summarise key results with reference to study objectives                                                                                                                                                     | 11    |
| Limitations              | 19  | Discuss limitations of the study, taking into account sources of potential bias or imprecision. Discuss both direction and magnitude of any potential bias                                                   | 11-12 |
| Interpretation           | 20  | Give a cautious overall interpretation of results considering objectives, limitations, multiplicity of analyses, results from similar studies, and other relevant evidence                                   | 12-14 |
| Generalisability         | 21  | Discuss the generalisability (external validity) of the study results                                                                                                                                        | 12-14 |
| <b>Other information</b> |     |                                                                                                                                                                                                              |       |
| Funding                  | 22  | Give the source of funding and the role of the funders for the present study and, if applicable, for the original study on which the present article is based                                                | 3     |

\*Give information separately for cases and controls in case-control studies and, if applicable, for exposed and unexposed groups in cohort and cross-sectional studies.

**Note:** An Explanation and Elaboration article discusses each checklist item and gives methodological background and published examples of transparent reporting. The STROBE checklist is best used in conjunction with this article (freely available on the Web sites of PLoS Medicine at <http://www.plosmedicine.org/>, Annals of Internal Medicine at <http://www.annals.org/>, and Epidemiology at <http://www.epidem.com/>). Information on the STROBE Initiative is available at [www.strobe-statement.org](http://www.strobe-statement.org).

# BMJ Open

## Area level impacts on emergency hospital admissions of the Integrated Care and Support Pioneer Programme in England: difference-in-differences analysis

|                                 |                                                                                                                                                                                                                                                                                                                                                                                                                                                                                                                                                                                             |
|---------------------------------|---------------------------------------------------------------------------------------------------------------------------------------------------------------------------------------------------------------------------------------------------------------------------------------------------------------------------------------------------------------------------------------------------------------------------------------------------------------------------------------------------------------------------------------------------------------------------------------------|
| Journal:                        | <i>BMJ Open</i>                                                                                                                                                                                                                                                                                                                                                                                                                                                                                                                                                                             |
| Manuscript ID                   | bmjopen-2018-026509.R1                                                                                                                                                                                                                                                                                                                                                                                                                                                                                                                                                                      |
| Article Type:                   | Research                                                                                                                                                                                                                                                                                                                                                                                                                                                                                                                                                                                    |
| Date Submitted by the Author:   | 17-Jun-2019                                                                                                                                                                                                                                                                                                                                                                                                                                                                                                                                                                                 |
| Complete List of Authors:       | Keeble, Eilís; The Nuffield Trust<br>Bardsley, M; The Health Foundation<br>Durand, Mary Alison; London School of Hygiene and Tropical Medicine, Policy Innovation and Evaluation Research Unit, Department of Health Services Research and Policy<br>Hoomans, Ties ; London School of Hygiene and Tropical Medicine, Policy Innovation and Evaluation Research Unit, Department of Health Services Research and Policy<br>Mays, Nicholas; London School of Hygiene and Tropical Medicine, Policy Innovation and Evaluation Research Unit, Department of Health Services Research and Policy |
| <b>Primary Subject Heading</b>: | Health services research                                                                                                                                                                                                                                                                                                                                                                                                                                                                                                                                                                    |
| Secondary Subject Heading:      | Health policy                                                                                                                                                                                                                                                                                                                                                                                                                                                                                                                                                                               |
| Keywords:                       | Quality in health care < HEALTH SERVICES ADMINISTRATION & MANAGEMENT, STATISTICS & RESEARCH METHODS, Organisation of health services < HEALTH SERVICES ADMINISTRATION & MANAGEMENT, Health policy < HEALTH SERVICES ADMINISTRATION & MANAGEMENT                                                                                                                                                                                                                                                                                                                                             |
|                                 |                                                                                                                                                                                                                                                                                                                                                                                                                                                                                                                                                                                             |

SCHOLARONE™  
Manuscripts

1  
2  
3 **Area level impacts on emergency hospital admissions of the Integrated Care and**  
4 **Support Pioneer Programme in England: difference-in-differences analysis**  
5  
6  
7

8 Corresponding author: Eilís Keeble, The Nuffield Trust, 59 New Cavendish Street, London,  
9 W1G 7LP, United Kingdom, email: eilis.keeble@nuffieldtrust.org.uk, phone: 0207 631 8450  
10  
11

12 Martin Bardsley, The Health Foundation (Formerly of The Nuffield Trust), London, United  
13 Kingdom  
14  
15

16  
17 Mary Alison Durand, Policy Innovation and Evaluation Research Unit, Department of Health  
18 Services Research and Policy, London School of Hygiene and Tropical Medicine, London,  
19 United Kingdom  
20  
21

22  
23 Ties Hoomans, Policy Innovation and Evaluation Research Unit, Department of Health  
24 Services Research and Policy, London School of Hygiene and Tropical Medicine, London,  
25 United Kingdom  
26  
27

28  
29 Nicholas Mays, Policy Innovation and Evaluation Research Unit, Department of Health  
30 Services Research and Policy, London School of Hygiene and Tropical Medicine, London,  
31 United Kingdom  
32  
33

34  
35  
36 Word Count: 3,151  
37  
38  
39  
40  
41  
42  
43  
44  
45  
46  
47  
48  
49  
50  
51  
52  
53  
54  
55  
56  
57  
58  
59  
60

## ABSTRACT

### Objective

To examine whether any differential change in emergency admissions could be attributed to integrated care by comparing Pioneer and non-Pioneer populations from a pre-Pioneer baseline period (April 2010 to March 2013) over two follow-up periods: to 2014/15 and to 2015/16.

### Design

Difference-in-differences analysis of emergency hospital admissions from English Hospital Episode Statistics (HES).

### Setting

Local authorities in England classified as either Pioneer or non-Pioneer.

### Participants

Emergency admissions to all NHS hospitals in England with local authority determined by area of residence of the patient.

### Intervention

Wave 1 of the Integrated Care and Support Pioneer Programme announced in November 2013.

### Primary Outcome Measure

Change in hospital emergency admissions.

### Results

The increase in the Pioneer emergency admission rate from baseline to 2014/15 was smaller at 1.98 per cent and significantly different from that of the non-Pioneers at 4.85 per cent ( $p=0.0395$ ). The increase in the Pioneer emergency admission rate from baseline to 2015/16 was again smaller than for the non-Pioneers but the difference was not statistically significant ( $p=0.1905$ ).

### Conclusions

It is ambitious to expect unequivocal changes in a high level and indirect indicator of health and social care integration such as emergency hospital admissions to arise as a result of the

1  
2  
3 changes in local health and social care provision across organisations brought about by the  
4  
5 Pioneers in their early years and we should treat any sign that the Pioneers have had such an  
6  
7 impact with caution. Nevertheless, there does seem to be an indication from the current  
8  
9 analysis that there were some changes in hospital use associated with the first year of Pioneer  
10  
11 status that are worthy of further exploration.  
12  
13

#### 14 **STRENGTHS AND LIMITATIONS OF THIS STUDY**

- 16 1. This study adds to the evidence of the impact of system-wide approaches to  
17  
18 integrating health and social care, like the Pioneer Programme, using advanced  
19  
20 statistical methods to determine whether the Pioneers reduced emergency  
21  
22 admissions.  
23
- 24 2. Reducing emergency admissions is often cited as a key goal of new integrated models  
25  
26 of care and the Hospital Episode Statistics provide a continuously collected person  
27  
28 level dataset to enable tracking of changes over time at small area level.  
29
- 30 3. Analysing the Pioneer sites collectively ensured the inclusion of a diverse range of  
31  
32 areas which were unlikely to be systematically different at baseline from the non-  
33  
34 Pioneers.  
35
- 36 4. It is difficult to find a true counter-factual population to compare with the Pioneers as  
37  
38 many other initiatives related to health and social care integration had been  
39  
40 developed in other areas of the country previously and/or were being implemented  
41  
42 almost simultaneously.  
43
- 44 5. The Pioneers invested in a collection of health and social care integration strategies  
45  
46 and interventions; identifying the causes and effects of these specific initiatives would  
47  
48 require detailed local primary data collection but this analysis focuses on the overall  
49  
50 impact of the Pioneers as a national policy initiative.  
51

#### 52 **KEYWORDS**

53 Organisation of health services, quality in health care, health policy, statistics and research  
54  
55 methods  
56  
57  
58  
59  
60

## INTRODUCTION

In November 2013, the Integrated Care and Support Pioneer programme was initiated in England. The programme aimed to promote integration between the separate local health and social care systems in England by facilitating these systems to develop and implement new ways of working together with the objective of meeting people's needs better and improving service users' experience of care .[1]

In the first wave of the programme the English Department of Health (DH) (now Department of Health and Social Care (DHSC)) selected 14 Pioneer areas from a round of competitive applications, that were identified as the "most ambitious and visionary" in their plans for health and social care system integration.[2] Each Pioneer was given access to limited support and expertise over a five-year period and a one-off fund of £90,000 to help with initial development. A second wave of 11 Pioneer areas was subsequently announced in January 2015. These are excluded from the present analysis as there are insufficient time points available currently for an interpretable trend analysis.

Integration in the Pioneer areas has taken on different forms. As Erens and colleagues noted, *"What it meant to be 'a Pioneer' varied between sites and between individuals within sites. At various times it was apparent that Pioneer status meant one or more of the following:*

- *a 'badge' for a locality signifying national recognition of innovation and progress in integrating care*
- *an enabler of the existing local plan for transformation*
- *a particular governance arrangement, for example a Board that brought all system leaders and their organisations around the table*
- *a collection of discrete workstreams, characteristically covering a combination of different groups of users and infrastructure projects (for example, information sharing, workforce development, etc.)*
- *a specific new integrated service, such as a frailty service*
- *an ethos or way of thinking about and providing care, rather than a specific plan or set of initiatives"*[3]

1  
2  
3 Some of the Pioneers planned to focus on specific populations. Of these, the most common  
4 were older people, people with long term conditions and people at high risk of hospitalisation.  
5  
6 Broadly, however, the Pioneers shared the same vision for the future of the health and social  
7 care system by seeking to create a 'whole system' of integrated care involving all local bodies  
8 and professional groups organised around the needs of individuals and their informal carers  
9 which set them apart from the rest of England.[4]  
10  
11  
12  
13  
14

15 All but one (Stoke and North Staffordshire) of the Wave 1 Pioneers stated that reducing  
16 emergency admissions was an aim or an expected outcome of integration in their original bid.  
17 Risk stratification with targeted interventions and introducing preventive strategies to avoid  
18 the need for acute hospitalisation were listed as activities to achieve this goal (see  
19 supplementary material). The focus on reducing emergency hospital care use was given still  
20 greater emphasis by the Pioneers as financial austerity bit more deeply into local health care  
21 budgets after 2013.[3]  
22  
23  
24  
25  
26  
27  
28

29 As a consequence of the focus on emergency hospital care as a costly service, the success of  
30 integrated care initiatives has often been presented, at least in part, in terms of their ability  
31 to reduce the need for emergency hospital admissions and to reduce emergency admission  
32 rates.[5] Reducing emergency admission rates has been a feature of English health policy over  
33 the past decade and continues to be one of the most commonly used measures of success for  
34 system change initiatives.[6–8] To date, however, there has been little evidence of initiatives  
35 successfully reducing emergency admissions.[9–11]  
36  
37  
38  
39  
40  
41

42 This paper presents new evidence on the effect of the Pioneer programme on emergency  
43 admissions. We investigate changes in the emergency admissions to hospitals of patients  
44 across England following the implementation of the programme in 2013. The analysis is part  
45 of a wider programme of evaluation of the Pioneers  
46 ([http://piru.lshtm.ac.uk/projects/current-projects/integrated-care-pioneers-  
48 evaluation.html](http://piru.lshtm.ac.uk/projects/current-projects/integrated-care-pioneers-<br/>47 evaluation.html)). Though it is not possible to identify precisely which elements of the  
49 programme, if any, led to any differential change observed (since the Pioneers were not  
50 working from an agreed template), such an analysis can be justified as a necessary step in  
51 understanding the impacts of a major initiative such as the integrated care Pioneer  
52 programme, especially since it had much in common with successive initiatives such as the  
53  
54  
55  
56  
57  
58  
59  
60



1  
2  
3 New Care Model Vanguard and the current focus on Integrated Care Systems (ICSs).[12-13]  
4  
5 The underlying hypothesis is that the cumulative effect of the specific initiatives embedded  
6  
7 in each Pioneer programme would bring about sufficient change in emergency hospital care  
8  
9 use as to be detectable at the level of the whole population of the Pioneers.

## 10 11 **METHODS**

12  
13  
14 To examine whether differential change in emergency admissions could be attributed to  
15  
16 Pioneer status a difference-in-differences approach was used. Difference-in-differences  
17  
18 measures the effect of the intervention (the Pioneer programme) by looking at the change in  
19  
20 emergency admissions between the two time points in the two groups and quantifies  
21  
22 whether or not the population within the Pioneer programme experiences a change that is  
23  
24 significantly different to the comparison group, the non-Pioneers.

### 25 26 **Data Sources**

27  
28 We used inpatient Hospital Episode Statistics (HES) to identify all emergency admissions to  
29  
30 NHS hospitals in Pioneer and non-Pioneer areas across England. HES is collated by NHS Digital  
31  
32 and is a pseudonymous patient level dataset that records basic features of admissions to  
33  
34 hospital including: patient age, sex, admission date and emergency admission indicator  
35  
36 (admission methods starting with "2").[14]

37  
38 To be able to compare emergency admission rates between areas (Pioneer/non-Pioneer), we  
39  
40 also obtained information on key local authority level factors determining local population  
41  
42 health and care needs:

- 43  
44 • Demographic composition (age and sex), from the Office for National Statistics  
45  
46 (ONS).[15]
- 47  
48 • Deprivation decile, from the 2015 Index of Multiple Deprivation.[16]

### 49 50 **Defining Pioneer Areas**

51  
52 The Pioneer areas did not all map neatly to a single set of health or local government  
53  
54 administrative boundaries. After consultation with each Pioneer, they were mapped to the  
55  
56 local authorities which most closely aligned with the intervention area (see supplementary  
57  
58 material for lookup table). Local authority boundaries were used instead of health boundaries  
59  
60 as the population denominators could be linked over a longer period. A wider breadth of data

1  
2  
3 is available for this boundary which is being used in other parts of the evaluation, for example  
4 social care data.  
5  
6

7  
8 The local authorities which were linked to the second wave of Pioneers, initiated in January  
9 2015, were excluded from all analyses and not included in either the Pioneer or non-Pioneer  
10 populations. Non-Pioneer areas were defined as any local authority that was not a first or  
11 second wave Pioneer.  
12  
13  
14

### 15 16 **Defining Time Periods**

17 A baseline period before Pioneer programme implementation of April 2010 to March 2013  
18 was compared to two follow-up periods: April 2014 to March 2015 (2014/15) and April 2015  
19 to March 2016 (2015/16). The period April 2013 to March 2014 was excluded as this  
20 encompassed the call for applications to the programme (May 2013) and the announcement  
21 of the sites (November 2013).  
22  
23  
24  
25  
26

### 27 28 **Outcome**

29 Our primary outcome was the average percentage difference in rates of emergency hospital  
30 admissions per 100,000 between baseline and follow-up (2014/15 or 2015/16) for the study  
31 groups (Pioneers/non-Pioneers). Area-level rates were calculated as the total number of  
32 emergency admissions over each time period divided by the mid-year population for each  
33 group. Admissions were derived by month and local authority of residence. They were  
34 adjusted for deprivation decile, age group (0-19, 20-39, 40-59, 60-79, 80+) and sex. The  
35 English age, sex and deprivation decile structure was used as the reference population for  
36 each local authority for the initial analysis. The secondary outcome was the difference in  
37 average percentage change in the rates over time between the Pioneers and non-Pioneers.  
38  
39  
40  
41  
42  
43  
44  
45  
46

### 47 48 **Statistical Analyses**

49 An initial difference-in-differences comparison was performed by looking at the change in the  
50 adjusted emergency admission rate for the Pioneers and non-Pioneers. Percentage  
51 differences between the baseline period and the two follow-up time points of 2014/15 and  
52 2015/16 were calculated, along with the difference between these.  
53  
54  
55  
56

57 To determine whether the change in emergency admissions in the Pioneers was significantly  
58 different from the change in the non-Pioneers, we performed difference-in-differences  
59  
60

1  
2  
3 regression analysis. We estimated negative binomial regression models for count data  
4 adjusting for age, sex and deprivation decile. Poisson models were first attempted but the  
5 data were over-dispersed and unsuitable. Each regression model included a continuous local  
6 authority population size exposure variable, a binary Pioneer status term (Pioneer/non-  
7 Pioneer), a binary time term (baseline/follow-up), a difference-in-differences term (Pioneer  
8 status\*time) and covariate terms. We obtained robust standard error estimates adjusting for  
9 clustering of the repeated measures from each local authority. Significance was assessed at  
10  $p < 0.05$ . SAS 9.4® was used for all analyses.  
11  
12  
13  
14  
15  
16  
17

### 18 **Difference-in-Differences Estimation Validation Tests**

19 To validate our difference-in-difference estimations, we tested the following assumptions:  
20  
21

- 22 1. That areas were not selected into the Programme based on emergency admission rates  
23 at baseline, by comparing baseline emergency admissions and demographics of the  
24 Pioneer and non-Pioneers.  
25  
26
- 27 2. That changes in emergency admission rates over time would be the same for both the  
28 Pioneer and non-Pioneer areas in the absence of the Pioneer programme, by comparing  
29 adjusted emergency admission rates for the Pioneers and non-Pioneers over the baseline  
30 period. These were compared graphically and statistically using a linear time trend of  
31 month in the baseline period interacted with Pioneer status controlling for age, sex and  
32 deprivation decile.  
33  
34  
35  
36  
37  
38  
39

### 40 **Sensitivity Analyses**

41 We examined sensitivity of the main findings to excluding Stoke and North Staffordshire  
42 Pioneer from our analyses and to using individual years for the baseline period (see  
43 supplementary material). Stoke and North Staffordshire had a unique target population and  
44 no focus on reducing emergency admissions. As the baseline period covered three years, each  
45 individual baseline year was also compared to the first follow-up time point.  
46  
47  
48  
49  
50  
51

### 52 **Patient and Public Involvement**

53 Patient and public representatives are involved in the wider evaluation of which this analysis  
54 forms a part and were involved in the selection and peer review of the initial proposal on  
55 which this analysis is based.  
56  
57  
58  
59  
60

## RESULTS

### Baseline Characteristics

The characteristics of the Pioneers and non-Pioneers during the baseline period of April 2010 to March 2013 are summarised in Table 1. The Pioneers consisted of 49 local authorities and encompassed 17 percent of the English population in the baseline period.[15] The proportions of the population aged 65 and over, or female, were similar between the two groups. Area level deprivation in the Pioneers was slightly higher than in the non-Pioneers.

Table 1 Baseline Characteristics of the Pioneer and non-Pioneer populations

| Characteristic                           | Pioneers<br>First Wave<br>(n = 14)* | Non-Pioneers |
|------------------------------------------|-------------------------------------|--------------|
| Number of Local Authorities              | 49                                  | 244          |
| Average Yearly Population at Baseline    | 9,083,051                           | 37,137,613   |
| Proportion Population Under 20           | 24%                                 | 24%          |
| Proportion Population Aged 65+           | 16%                                 | 17%          |
| Proportion Population Female             | 50%                                 | 50%          |
| Average Local Authority IMD Score (2015) | 21.1                                | 18.7         |

\* 11 second wave Pioneers and 33 associated local authorities were excluded from the analyses

### Trend Analysis

Figure 1 shows the adjusted monthly emergency admission rates for the Pioneers and non-Pioneers between April 2010 and March 2016. On visual inspection, the trends in the baseline period overlap which indicates that trend bias should have limited impact on the difference-in-differences analysis. A statistical test of the trends in the baseline period also indicated limited trend bias ( $p=0.7378$ ).

### Difference-in-Differences

Between the baseline period and the first follow-up period (2014/15) average emergency admission rates decreased by 0.42% for the Pioneer and increased by 3.46% for the non-Pioneers, with a difference-in-differences of 3.89% (see Table 2). When the baseline was compared to the second follow-up period (2015/16), the Pioneers still had a lower increase at 2.23% but the difference compared to the non-Pioneers was smaller at 3.23%.

Table 2 Emergency admission rates for Pioneers and Non-Pioneers (adjusted for age, sex and deprivation decile) at baseline and follow-up, with percentage differences compared to baseline and difference in difference between non-Pioneer and Pioneer

|             | Emergency Admission Rate<br>(per 100,000 population) |         |         | Percentage Difference |         | Difference-in-Differences* |         |
|-------------|------------------------------------------------------|---------|---------|-----------------------|---------|----------------------------|---------|
|             | Baseline                                             | 2014/15 | 2015/16 | 2014/15               | 2015/16 | 2014/15                    | 2015/16 |
| Non-Pioneer | 9,942                                                | 10,287  | 10,485  | 3.46%                 | 5.46%   | 3.89%                      | 3.23%   |
| Pioneer     | 9,948                                                | 9,906   | 10,170  | -0.42%                | 2.23%   |                            |         |

\* *Difference between the non-Pioneer and Pioneer percentage difference, positive value indicates non-Pioneer change is greater*

Trends for the individual Pioneers varied. For example, half the Pioneers had a percentage increase in their emergency admission rates between baseline and 2014/15, while the percentage difference for the Pioneers as a whole was a slight decrease (see Table 3). There was also variation within Pioneers (see supplementary material). For example, the constituent local authorities comprising the Waltham Forest, East London and City Pioneer had declines in emergency admission rates ranging from -10.45% (Tower Hamlets) to -1.64% (Newham) between baseline and 2014/15, while the overall percentage difference was -9.85%.

Table 3 Emergency admission rates for individual pioneers (adjusted for age, sex and deprivation decile) at baseline and follow-up, with percentage differences compared to baseline

| Pioneer (Number of LAs)                  | Emergency Admission Rate<br>(per 100,000 population) |         |         | Percentage Difference<br>to Baseline |         |
|------------------------------------------|------------------------------------------------------|---------|---------|--------------------------------------|---------|
|                                          | Baseline                                             | 2014/15 | 2015/16 | 2014/15                              | 2015/16 |
| Barnsley (1)                             | 10,992                                               | 11,769  | 12,325  | 7.07%                                | 12.13%  |
| Cheshire (2)                             | 11,259                                               | 12,160  | 12,459  | 8.00%                                | 10.65%  |
| Cornwall and Isles of Scilly (2)         | 8,170                                                | 8,061   | 8,193   | -1.33%                               | 0.29%   |
| Greenwich (1)                            | 8,168                                                | 8,226   | 9,513   | 0.71%                                | 16.47%  |
| Islington (1)                            | 6,324                                                | 6,320   | 6,096   | -0.06%                               | -3.60%  |
| Kent (12)                                | 9,349                                                | 10,033  | 10,009  | 7.32%                                | 7.06%   |
| Leeds (1)                                | 11,399                                               | 9,605   | 10,155  | -15.74%                              | -10.91% |
| North West London (8)                    | 8,922                                                | 8,665   | 8,812   | -2.87%                               | -1.23%  |
| South Devon and Torbay (3)               | 7,415                                                | 7,630   | 8,803   | 2.90%                                | 18.72%  |
| South Tyneside (1)                       | 11,153                                               | 10,445  | 11,150  | -6.35%                               | -0.03%  |
| Southend (1)                             | 9,243                                                | 10,397  | 10,224  | 12.49%                               | 10.61%  |
| Stoke and North Staffordshire (7)        | 9,949                                                | 10,253  | 10,611  | 3.06%                                | 6.66%   |
| Waltham Forest, East London and City (3) | 9,184                                                | 8,657   | 8,279   | -5.73%                               | -9.85%  |
| Worcestershire (6)                       | 9,018                                                | 8,817   | 9,006   | -2.23%                               | -0.13%  |

### Difference-in-Differences Regression

After adjusting for age, sex and deprivation, the difference-in-differences regression analysis showed that the change in emergency admission rates in the Pioneers between baseline and 2014/15 was smaller and significantly different from that of the non-Pioneers ( $p=0.0394$ ) (see Table 4). The Pioneer emergency admission rate increased by 1.98 per cent compared to 4.85 per cent in the non-Pioneers. When comparing baseline with 2015/16, the analysis still indicated that the change in emergency admissions for the Pioneers was smaller at 4.07 per cent compared to 6.36 per cent for the non-Pioneers but the difference was not statistically significant ( $p=0.1905$ ).

Table 4 Difference in difference model coefficients and percentage difference in emergency admissions for Pioneers and Non-Pioneers, adjusted for age, sex and deprivation

|                                                        | 2014/15           | 2015/16           |
|--------------------------------------------------------|-------------------|-------------------|
| <b>Model Coefficients (p value)</b>                    |                   |                   |
| Intercept                                              | -5.4234 (<0.0001) | -5.4259 (<0.0001) |
| Non-Pioneer/Pioneer                                    | -0.0044 (0.8169)  | -0.0043 (0.8190)  |
| Baseline/Follow-Up                                     | 0.04173 (<0.0001) | 0.0617 (<0.0001)  |
| Interaction                                            | -0.0278 (0.0394)  | -0.0218 (0.1905)  |
| <b>Percentage Difference [95% confidence interval]</b> |                   |                   |
| Non-Pioneer                                            | 4.85 [3.68,6.03]  | 6.36 [5.05,7.70]  |
| Pioneer                                                | 1.98 [-0.37,4.38] | 4.07 [1.03,7.20]  |

### DISCUSSION

The Integrated Care and Support Pioneers represent one important example of how English health and social care services have been exploring new ways of working across organisational boundaries. The aims of the individual Pioneers varied,<sup>[3]</sup> but most had a common interest in providing care and support that was intended to reduce the need for urgent care services and lead to a reduction in emergency hospital admissions. After comparing changes in emergency admissions from a three-year pre-Pioneer baseline period between Pioneer populations and non-Pioneer populations, we found a lower increase in emergency admissions for the Pioneers than the non-Pioneers. This lower increase was statistically significant for the comparison between baseline and 2014/15 ( $p=0.0394$ ) but not for the comparison between baseline and 2015/16 ( $p=0.1905$ ).

1  
2  
3 This type of population level analysis can help provide some independent evidence of the  
4 likely scale of changes within an area associated with integrated care initiatives and curb some  
5 of the more zealous rhetoric for or against integrated health and social care, and related  
6 changes in service delivery. Looking at emergency admission data on this scale means the  
7 outcome of interest is based on a relatively large number of events and continuously collected  
8 data – making them useful as a measure of potential programme impact. This is in contrast  
9 to a range of other potential measures of health and social care integration at community  
10 level that are likely to be less sensitive to short term change such as annual patient experience  
11 surveys. The size and range of geographical areas covered by both the Pioneers and non-  
12 Pioneers along with their socio-demographic similarities should mean that differences in  
13 factors such as supply of social care services or acute hospital beds and the process of  
14 collecting data are unlikely to be systematically different between the two groups beyond any  
15 changes associated with Pioneer status.  
16  
17

18  
19 It would be beneficial to track emergency admissions for more than two years to measure the  
20 impact of policy initiatives such as the Pioneers more definitively. However, during the life of  
21 the Pioneer programme, there were parallel changes in the wider policy context both in terms  
22 of specific health and care integration policies such as the Better Care Fund,[17] the overall  
23 level of funding for both health and social care in a period of unprecedented financial  
24 austerity and,[18] from 2015 onwards, the New Care Model Vanguard.[19] In particular, the  
25 Vanguard's approach to improving care coordination had much in common with the Pioneers.  
26 This means that the ideas behind integration that prompted the Pioneers and the types of  
27 interventions that they developed are no longer (if they ever were) unique to these areas and  
28 are being implemented across the country. Therefore, a true counter-factual population is  
29 difficult to find. This may, in part, explain why the difference between the Pioneers and non-  
30 Pioneers reduced between baseline and 2015/16 compared with baseline and 2014/15 as the  
31 behaviour of the non-Pioneers becomes increasingly similar to the Pioneers.[20] This is in part  
32 to be expected as disseminating learning from the Pioneers was actively encouraged as part  
33 of the programme.  
34  
35

36  
37 In addition to the difficulties of finding a counterfactual over the life-time of the Pioneers, it  
38 was not the first programme to focus on health and social care integration in England. One  
39 such previous initiative was the Integrated Care Pilots. While an effect on emergency  
40  
41  
42  
43  
44  
45  
46  
47  
48  
49  
50  
51  
52  
53  
54  
55  
56  
57  
58  
59  
60



1  
2  
3 admissions was not found for this programme, it can't be ruled out that these pilots have had  
4 a legacy impact on emergency admissions.[21] It should therefore be note that, three of the  
5  
6  
7  
8  
9  
10  
11  
12  
13  
14  
15  
16  
17  
18  
19  
20  
21  
22  
23  
24  
25  
26  
27  
28  
29  
30  
31  
32  
33  
34  
35  
36  
37  
38  
39  
40  
41  
42  
43  
44  
45  
46  
47  
48  
49  
50  
51  
52  
53  
54  
55  
56  
57  
58  
59  
60

admissions was not found for this programme, it can't be ruled out that these pilots have had a legacy impact on emergency admissions.[21] It should therefore be note that, three of the Pioneers overlap with areas that were previously Integrated Care Pilots (Cornwall, Torbay and Tower Hamlets) and therefore, may have had a focus on integration for longer than some other Pioneers. This may in part explain the steady declines in emergency admissions seen in Tower Hamlets and to a lesser extent Cornwall. Seven of the Integrated Care Pilots also covered areas which were not Pioneers and therefore, the impact of the Pioneers in contrast to these may be reduced.

A more detailed understanding of the impacts of the Pioneers would be gained with a targeted analytical approach using information on the specific initiatives implemented in each Pioneer and data on the exact populations in receipt of these initiatives (this is being attempted in another component of the Pioneer evaluation). While this might yield gains in terms of causal inference in that changes could potentially be attributed to a specific set of local actions, such an analysis might lose the ability to assess the impact of change across a system and an entire population. This is important to note as the Pioneers were intended to be a complex mix of specific service changes and initiatives, supported by a wider pattern of infrastructural changes at the level of the local health and social care system.

Other studies have looked at schemes with an aspiration to reduce the need for urgent hospital care through better coordinated health and care services, and with an emphasis on preventing admissions. Success is typically assessed in terms of reduction in emergency hospital admissions and various previous evaluations show that this has been difficult to achieve.[9–11] Despite the intense policy interest in how different forms of service delivery can reduce emergency admissions, there are few, if any, studies showing unequivocal change in the direction desired. Against this backdrop, the modest changes observed across the 14 wave one Pioneer areas in their first two years look promising. However, when exploring the extent to which the observed changes are likely to be related causally to Pioneer status, it should be noted that:

- a. the effect appears to be temporary: and as such the effect may have been linked to changes that took place in the early stages of the Pioneers or pre-Pioneer but



- 1  
2  
3 were not sustained; or the non-Pioneer areas introduced changes which have  
4 subsequently reduced the difference between them and the Pioneers; and  
5  
6  
7 b. the changes in emergency admissions were not shown in all places and even varied  
8  
9 between local authority areas within the same Pioneer.

## 11 **Conclusion**

12  
13 It is ambitious to expect unequivocal changes in a single high level and indirect indicator of  
14 health and care integration such as emergency hospital admissions to arise as a result of  
15 changes in local health and care provision across organisations brought about by the Pioneers  
16 in their early years. We should treat any signs that the Pioneers have had such an impact with  
17 caution. Nevertheless, our analysis does seem to provide some evidence that there were  
18 some changes in hospital use associated with the first year of Pioneer status that are worthy  
19 of further exploration. At the very least, this analysis shows that Pioneer status does not seem  
20 to have been associated with a relative deterioration in performance in terms of emergency  
21 hospital use.  
22  
23  
24  
25  
26  
27  
28  
29  
30

## 31 **FIGURE LEGEND**

32  
33 Figure 1 Emergency admission rate for Pioneers and Non-Pioneers by month adjusted for age,  
34 sex and deprivation decile (Pioneer intervention introduced in shaded area)  
35  
36  
37  
38

## 39 **AUTHOR CONTRIBUTIONS**

40  
41 EK undertook the analysis and with MB drafted the initial paper. MB and NM contributed to  
42 design of the study. EK, MB, MAD, TH and NM contributed to interpretation of findings and  
43 revisions of the paper.  
44  
45  
46  
47

## 48 **ACKNOWLEDGEMENTS**

49  
50 This work uses data provided by patients and collected by the NHS as part of their care and  
51 support. Read more at <https://www.nuffieldtrust.org.uk/about/corporate-policies#information-security-and-data>.  
52  
53  
54  
55  
56

57  
58 Hospital Episode Statistics data (year range 2007/08–2015/16) Copyright © (2018), NHS  
59 Digital. Re-used with the permission of NHS Digital. All rights reserved.  
60

**FUNDING**

This study is funded by the NIHR Policy Research Programme (*Evaluation of the Integrated Care and Support Pioneers Programme in the context of new funding arrangements for integrated care in England* (2015-2020), PR-R10-0514-25001). The views expressed are those of the authors and are not necessarily those of the NIHR or the Department of Health and Social Care.

**COMPETING INTERESTS**

This study is funded by the NIHR Policy Research Programme (*Evaluation of the Integrated Care and Support Pioneers Programme in the context of new funding arrangements for integrated care in England* (2015-2020), PR-R10-0514-25001). The views expressed are those of the authors and are not necessarily those of the NIHR or the Department of Health and Social Care.

**DATA AVAILABILITY**

This study used Hospital Episode Statistics data obtained from NHS Digital under a data sharing agreement and are reused with their permission. Hospital Episode Statistics data may be obtained from NHS Digital under a similar process but we are unable to share it per the terms of our agreement.

## REFERENCES

- 1  
2  
3  
4  
5 [1] NHS England. Integrated care pioneers announced. 2013. Available:  
6 <https://www.england.nhs.uk/2013/11/interg-care-pioneers/>. [Accessed: 01-Aug-2018].  
7  
8  
9 [2] Department of Health. Letter inviting expressions of interest for health and social care  
10 integration “Pioneers”. 2013. Available:  
11 <https://www.gov.uk/government/publications/social-care-integration-pioneers>.  
12 [Accessed: 01-Aug-2018].  
13  
14  
15  
16 [3] Erens B, Wistow G, Mounier-Jack S, et al. Early evaluation of Integrated Care and  
17 Support Pioneers Programme: Final Report. Policy Innovation Research Unit. 2015.  
18 Available:  
19 [http://piru.lshtm.ac.uk/assets/files/Early\\_evaluation\\_of\\_IC\\_Pioneers\\_Final\\_Report.pdf](http://piru.lshtm.ac.uk/assets/files/Early_evaluation_of_IC_Pioneers_Final_Report.pdf)  
20 . [Accessed: 01-Aug-2018].  
21  
22  
23  
24  
25 [4] National Collaboration for Integrated Care and Support. Integrated Care and Support:  
26 Our Shared Commitment. 2013. Available:  
27 [https://assets.publishing.service.gov.uk/government/uploads/system/uploads/attach](https://assets.publishing.service.gov.uk/government/uploads/system/uploads/attachment_data/file/198748/DEFINITIVE_FINAL_VERSION_Integrated_Care_and_Support_-_Our_Shared_Commitment_2013-05-13.pdf)  
28 [ment\\_data/file/198748/DEFINITIVE\\_FINAL\\_VERSION\\_Integrated\\_Care\\_and\\_Support\\_-](https://assets.publishing.service.gov.uk/government/uploads/system/uploads/attachment_data/file/198748/DEFINITIVE_FINAL_VERSION_Integrated_Care_and_Support_-_Our_Shared_Commitment_2013-05-13.pdf)  
29 [\\_Our\\_Shared\\_Commitment\\_2013-05-13.pdf](https://assets.publishing.service.gov.uk/government/uploads/system/uploads/attachment_data/file/198748/DEFINITIVE_FINAL_VERSION_Integrated_Care_and_Support_-_Our_Shared_Commitment_2013-05-13.pdf). [Accessed: 01-Aug-2018].  
30  
31  
32  
33  
34 [5] Raleigh V, Bardsley M, Smith P, et al. Integrated care and support Pioneers: Indicators  
35 for measuring the quality of integrated care: Final report. Policy Innovation Research  
36 Unit. 2014. Available: [http://piru.lshtm.ac.uk/assets/files/IC\\_and\\_support\\_Pioneers-](http://piru.lshtm.ac.uk/assets/files/IC_and_support_Pioneers-Indicators.pdf)  
37 [Indicators.pdf](http://piru.lshtm.ac.uk/assets/files/IC_and_support_Pioneers-Indicators.pdf). [Accessed: 01-Aug-2018].  
38  
39  
40  
41 [6] National Audit Office. Emergency admissions to hospital: managing the demand.  
42 National Audit Office. 2013. Available: [https://www.nao.org.uk/wp-](https://www.nao.org.uk/wp-content/uploads/2013/10/10288-001-Emergency-admissions.pdf)  
43 [content/uploads/2013/10/10288-001-Emergency-admissions.pdf](https://www.nao.org.uk/wp-content/uploads/2013/10/10288-001-Emergency-admissions.pdf). [Accessed: 01-Aug-  
44 [2018](https://www.nao.org.uk/wp-content/uploads/2013/10/10288-001-Emergency-admissions.pdf)].  
45  
46  
47  
48 [7] Wallace E, Smith SM, Fahey T, et al. Reducing emergency admissions through  
49 community based interventions. *BMJ* 2016;352:h6817  
50 doi:10.1136/bmj.h6817 [published Online first: 28 January 2016].  
51  
52  
53  
54 [8] Lloyd T, Wolters A, Steventon A. The impact of providing enhanced support for care  
55 home residents in Rushcliffe. The Health Foundation. 2017. Available:  
56 <https://www.health.org.uk/publication/impact-enhanced-support-rushcliffe>.  
57 [Accessed: 01-Aug-2018].  
58  
59  
60

- 1  
2  
3 [9] Bardsley M, Steventon A, Smith J, et al. Evaluating integrated and community-based  
4 care: How do we know what works? The Nuffield Trust. 2013. Available:  
5 [https://www.nuffieldtrust.org.uk/files/2017-01/evaluating-integrated-community-](https://www.nuffieldtrust.org.uk/files/2017-01/evaluating-integrated-community-care-web-final.pdf)  
6 [care-web-final.pdf](https://www.nuffieldtrust.org.uk/files/2017-01/evaluating-integrated-community-care-web-final.pdf). [Accessed: 01-Aug-2018].  
7  
8  
9  
10 [10] Roland M, Lewis R, Steventon A, et al. Case management for at-risk elderly patients in  
11 the English integrated care pilots: observational study of staff and patient experience  
12 and secondary care utilisation. *Int J Integr Care* 2012;12(5)  
13 <http://doi.org/10.5334/ijic.850>.  
14  
15  
16 [11] Purdy S, Paranjothy S, Huntley A, et al. Interventions to reduce unplanned hospital  
17 admission: a series of systematic reviews. National Institute for Health Research. 2012.  
18 Available: [http://www.bristol.ac.uk/media-](http://www.bristol.ac.uk/media-library/sites/primaryhealthcare/migrated/documents/unplannedadmissions.pdf)  
19 [library/sites/primaryhealthcare/migrated/documents/unplannedadmissions.pdf](http://www.bristol.ac.uk/media-library/sites/primaryhealthcare/migrated/documents/unplannedadmissions.pdf).  
20 [Accessed: 01-Aug-2018].  
21  
22  
23 [12] NHS England. New Care Models: Vanguard – developing a blueprint for the future of  
24 the NHS and care services. 2016. Available: [https://www.england.nhs.uk/wp-](https://www.england.nhs.uk/wp-content/uploads/2015/11/new_care_models.pdf)  
25 [content/uploads/2015/11/new\\_care\\_models.pdf](https://www.england.nhs.uk/wp-content/uploads/2015/11/new_care_models.pdf) [Accessed: 11-Jun-2019]  
26  
27  
28 [13] NHS England. Breaking down barriers to better health and care. 2019. Available:  
29 [https://www.england.nhs.uk/wp-content/uploads/2019/04/breaking-down-barriers-](https://www.england.nhs.uk/wp-content/uploads/2019/04/breaking-down-barriers-to-better-health-and-care-march19.pdf)  
30 [to-better-health-and-care-march19.pdf](https://www.england.nhs.uk/wp-content/uploads/2019/04/breaking-down-barriers-to-better-health-and-care-march19.pdf) [Accessed: 11-Jun-2019]  
31  
32  
33 [14] NHS Digital. Hospital Episode Statistics data 2007/08-2015/16.  
34  
35  
36 [15] Office for National Statistics. Population estimates 2007-2015. Available:  
37 [https://www.ons.gov.uk/peoplepopulationandcommunity/populationandmigration/po-](https://www.ons.gov.uk/peoplepopulationandcommunity/populationandmigration/populationestimates)  
38 [pulationestimates](https://www.ons.gov.uk/peoplepopulationandcommunity/populationandmigration/populationestimates). [Accessed: 14-May-2018].  
39  
40  
41 [16] Ministry of Housing, Communities and Local Government. English indices of  
42 deprivation 2015. Available: [https://www.gov.uk/government/statistics/english-](https://www.gov.uk/government/statistics/english-indices-of-deprivation-2015)  
43 [indices-of-deprivation-2015](https://www.gov.uk/government/statistics/english-indices-of-deprivation-2015). [Accessed: 12-Jun-2018].  
44  
45  
46 [17] NHS England. Better Care Fund. Available: [https://www.england.nhs.uk/ourwork/part-](https://www.england.nhs.uk/ourwork/part-rel/transformation-fund/bcf-plan/)  
47 [rel/transformation-fund/bcf-plan/](https://www.england.nhs.uk/ourwork/part-rel/transformation-fund/bcf-plan/). [Accessed: 14-May-2018].  
48  
49  
50 [18] Robertson R, Wenzel L, Thompson J, et al. Understanding NHS financial pressures: How  
51 are they affecting patient care? The Kings Fund. 2017.  
52  
53  
54  
55  
56  
57  
58  
59  
60

- 1  
2  
3 [19] NHS. NHS Five Year Forward View. 2014. Available: [https://www.england.nhs.uk/wp-](https://www.england.nhs.uk/wp-content/uploads/2014/10/5yfv-web.pdf)  
4 content/uploads/2014/10/5yfv-web.pdf. [Accessed: 01-Aug-2018].  
5  
6  
7 [20] Chen YF, Hemming K, Stevens AJ, et al. Secular trends and evaluation of complex  
8 interventions: the rising tide phenomenon. *BMJ Qual Saf* 2016;25(5)303–310 doi:  
9 10.1136/bmjqs-2015-004372 [published Online first: 06 Oct 2015].  
10  
11  
12 [21] RAND Europe and Ernst & Young LLP. National Evaluation of the Department of Health's  
13 Integrated Care Pilots: Final Report. 2012. Available:  
14 [https://assets.publishing.service.gov.uk/government/uploads/system/uploads/attach](https://assets.publishing.service.gov.uk/government/uploads/system/uploads/attachment_data/file/215103/dh_133127.pdf)  
15 ment\_data/file/215103/dh\_133127.pdf [Accessed: 14-Jun-2019]  
16  
17  
18  
19  
20  
21  
22  
23  
24  
25  
26  
27  
28  
29  
30  
31  
32  
33  
34  
35  
36  
37  
38  
39  
40  
41  
42  
43  
44  
45  
46  
47  
48  
49  
50  
51  
52  
53  
54  
55  
56  
57  
58  
59  
60

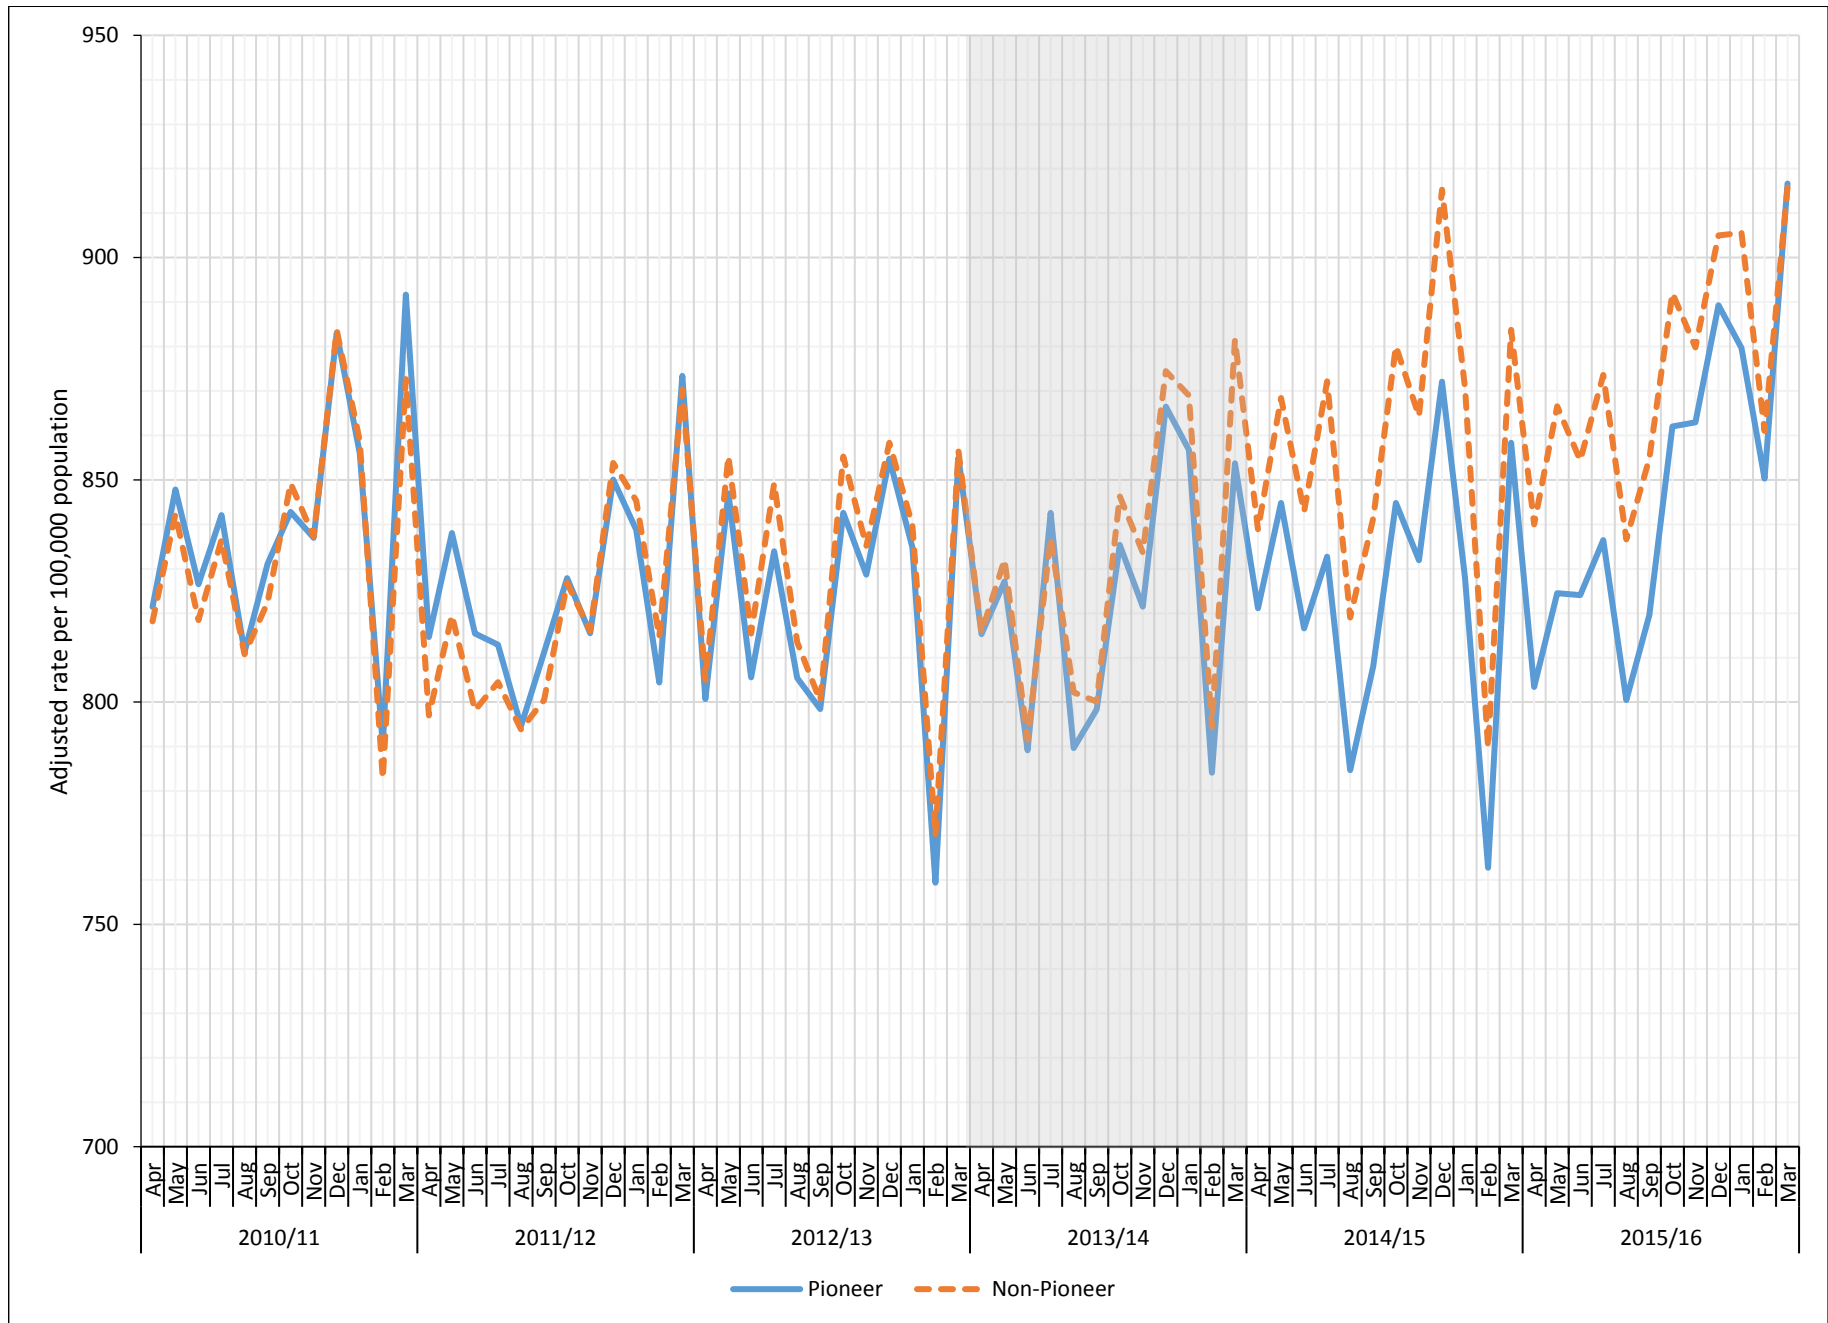

**SUPPLEMENTARY MATERIAL**

1. Target populations, integration mechanisms, activities and emergency admission focus of Wave 1 Pioneers
2. Local Authority to Pioneer Lookup
3. Emergency admission rates for individual local authorities within Pioneers
4. Sensitivity analysis: excluding Stoke and North Staffordshire Pioneer
5. Sensitivity analysis: individual baseline years compared to 2014/15

For peer review only

### 1. Target populations, integration mechanisms, activities and emergency admission focus of Wave 1 Pioneers

| Pioneer                      | Target Population(s)                                                                                | Integration Mechanisms                                                                                                                                                                                                                                                                                                         | Examples of Specific Activities                                                                                                                                                                                                       | Reduced emergency admissions |
|------------------------------|-----------------------------------------------------------------------------------------------------|--------------------------------------------------------------------------------------------------------------------------------------------------------------------------------------------------------------------------------------------------------------------------------------------------------------------------------|---------------------------------------------------------------------------------------------------------------------------------------------------------------------------------------------------------------------------------------|------------------------------|
| Barnsley                     | Whole population with focus on children and families                                                | Integrated programme boards; Adopting a citizenship approach at all levels of the community to move from intervention to prevention; Provision of information, advice, and signposting through services such as telecare.                                                                                                      | Universal information and advice service; Be Well Barnsley: community orientated prevention; Immediate care review; Integrated personal budgets                                                                                       | Aim                          |
| Cheshire                     | Older adults with chronic conditions; individuals with mental health issues; complex needs families | Integration commissioning through a joint governance board, redesigned care and intervention pathways and joint investment plan involving the voluntary and community sectors; Integration of care management and investment into integration enablers, such as shared records and telehealth services.                        | New funding/contracting model for the acute sector and community care; Hospital at home; Partnership working between Health Care Management Financial Association, Health Care Services and Net Orange to reduce hospital admissions; | Outcome                      |
| Cornwall and Isles of Scilly | People who are at risk of becoming high users of health and social care services                    | Integrated leadership through shared goals and performance measures, information sharing and a new funding contract; Investment in telehealth; Integrated care through multi-disciplinary teams, workforce development, information sharing; Better prevention through early risk identification and management of acute care. | Personal health budgets; Specific acute activities: <ul style="list-style-type: none"> <li>- Rapid assessment upon presentation to acute care</li> <li>- Discharge support</li> <li>- Visual ward model</li> </ul>                    | Outcome                      |



|           |                                                                                                                                                   |                                                                                                                                                                                                                                                                                                                                |                                                                                                                                                                                                                                                                                                                                                                                                                                                                                                                        |         |
|-----------|---------------------------------------------------------------------------------------------------------------------------------------------------|--------------------------------------------------------------------------------------------------------------------------------------------------------------------------------------------------------------------------------------------------------------------------------------------------------------------------------|------------------------------------------------------------------------------------------------------------------------------------------------------------------------------------------------------------------------------------------------------------------------------------------------------------------------------------------------------------------------------------------------------------------------------------------------------------------------------------------------------------------------|---------|
| Greenwich | Older people with complex or chronic conditions; individuals with mental health issues                                                            | Integrated commissioning through joint health and social care assessment, planning and management; Integrated care through multi-disciplinary teams including the voluntary sector, shared care plans, information and investment in self-care initiatives such as telehealth; Better prevention and management of acute care. | Personal health budgets; Specific acute activities: <ul style="list-style-type: none"> <li>- Risk stratification to identify 11.5% at highest risk of hospital admission within one year</li> <li>- Virtual admission avoidance team</li> <li>- Greenwich Joint Emergency Team (JET)</li> <li>- Access to the medical diagnostic centre at the acute trust and outreach specialist opinion</li> <li>- Hospital Intervention Discharge Team</li> <li>- Community Assessment and Rehabilitation Teams (CARs).</li> </ul> | Outcome |
| Islington | Whole population with focus on vulnerable older people; people with long term conditions; young people at risk; people with mental health issues. | Integrated commissioning including patients through shared vision, planning, and information sharing; Integrated care activities including information sharing; Better prevention activities, including self-management support through personal health budgets and telehealth.                                                | Incentivising acute and community healthcare services through CQUIN<br>Care pathways for conditions like COPD.                                                                                                                                                                                                                                                                                                                                                                                                         | Aim     |
| Kent      | Adults with long term conditions and older people                                                                                                 | Integrated commissioning through information sharing and data mapping; Integrated care through multidisciplinary care teams organised around GP practices and workforce development; Better prevention through risk identification, and self-management activities such as personal health budgets and telehealth.             | Year of Care financial model and risk stratification; Multidisciplinary care team meetings and neighbourhood care teams, integrated working within A&E departments, community integrated care centres; Advanced Assistive technology partnership, joint working between paramedics and social care practitioners to respond quickly to 999 calls.                                                                                                                                                                      | Aim     |

|                        |                                                   |                                                                                                                                                                                                                                                                              |                                                                                                                                                                                                                                                                           |         |
|------------------------|---------------------------------------------------|------------------------------------------------------------------------------------------------------------------------------------------------------------------------------------------------------------------------------------------------------------------------------|---------------------------------------------------------------------------------------------------------------------------------------------------------------------------------------------------------------------------------------------------------------------------|---------|
| Leeds                  | Whole population                                  | Integrated commissioning with shared vision, outcomes and budget;<br>Integrated care through health and social care teams focused around GP practice populations and workforce development;<br>Prevention through self-management activities such as telehealth.             | Risk stratification and year of care model;<br>Divestment from emergency department; funding where appropriate to reinvest into community-based services;<br>Fully integrated health and social care bed unit                                                             | Outcome |
| North West London      | Whole population                                  | Integrated commissioning with a shared vision, responsibility, budget allocation and information sharing;<br>Integrated care through joined up services, incentives, multidisciplinary care teams and care plans;<br>Prevention and self-management through personalisation. | Integrated care organisation;<br>Bespoke IT tool to access patient data for both patients and care providers to help prevent readmission.                                                                                                                                 | Aim     |
| Southend               | Whole population with focus on high service users | Integrated commissioning through a Pioneer Strategic Group, with a shared budget and information management;<br>Integrated care through increased involvement of the voluntary sector and patients in co-design and workforce development.                                   | 7-day multidisciplinary teams;<br>Extension of the Single Point of Referral (SPOR) to reduce avoidable admissions and delayed transfers of care;<br>Hospital discharge-step down scheme.                                                                                  | Outcome |
| South Devon and Torbay | Whole population                                  | Integrated commissioning and governance arrangements with shared objectives, information sharing and bringing together leaders in the health and social care system;                                                                                                         | Support for a 24/7 hospice at home service through a chosen care home provider, with a team of specialist nurses and senior healthcare assistants, a rapid response service and night driver team;<br>Pilot of Sunday working over three consecutive weekends on 5 wards; | Outcome |

|                                      |                                                                                                                          |                                                                                                                                                                                                                                                                                                                                                                             |                                                                                                                                                                  |         |
|--------------------------------------|--------------------------------------------------------------------------------------------------------------------------|-----------------------------------------------------------------------------------------------------------------------------------------------------------------------------------------------------------------------------------------------------------------------------------------------------------------------------------------------------------------------------|------------------------------------------------------------------------------------------------------------------------------------------------------------------|---------|
|                                      |                                                                                                                          | Integrated care, not as an objective but an enabler, including an integrated care organisation providing acute, community and social care services 7 days a week, multidisciplinary teams including involvement of voluntary sector and workforce development;<br>Two programmes of work focused on better management of care and support for the elderly and young people. | Joined up IT including E-prescribing, E-booking and VitalPAC across healthcare organisations.                                                                    |         |
| South Tyneside                       | Whole population with focus on people who could benefit from initiatives on prevention, wellness promotion and self-care | Integrated commissioning and provision of care, through shared funding, joint decision-making, workforce development and information sharing.                                                                                                                                                                                                                               | Urgent care delivery group.<br>Predictive modelling to identify groups of patients vulnerable to hospital admission.                                             | Aim     |
| Stoke and North Staffordshire        | Cancer and end-of-life care patients                                                                                     | Integrated service development through co-design by CCGs, Macmillan Cancer Support, Local Authorities and Public Health England to create accountable Service Integrator;<br>Integrated commissioning through shared arrangements across CCGs and social care and outcomes;<br>Integrated care through workforce development and co-design of care pathways.                | Appointment of a principal provider for cancer and a principal provider for end of life care accountable for the determination of patient pathways through care. | -       |
| Waltham Forest, East London and City | People at risk of hospital admission                                                                                     | Integrated commissioning through data sharing, joint                                                                                                                                                                                                                                                                                                                        | Whole System Demonstrator pilot.<br>Waltham Forest case management and rapid response programme.                                                                 | Outcome |

1  
2  
3  
4  
5  
6  
7  
8  
9  
10  
11  
12  
13  
14  
15  
16  
17  
18  
19  
20  
21  
22  
23  
24  
25  
26  
27  
28  
29  
30  
31  
32  
33  
34  
35  
36  
37  
38  
39  
40  
41  
42  
43  
44  
45  
46

|                |                                                                                  |                                                                                                                                                                                                                                                                                                                                                                                                                                                                                         |                                                                                                                                                                       |         |
|----------------|----------------------------------------------------------------------------------|-----------------------------------------------------------------------------------------------------------------------------------------------------------------------------------------------------------------------------------------------------------------------------------------------------------------------------------------------------------------------------------------------------------------------------------------------------------------------------------------|-----------------------------------------------------------------------------------------------------------------------------------------------------------------------|---------|
|                |                                                                                  | health/social care assessment, joint contracting and payment; Integrated care through workforce development, restructuring of secondary care providers, greater involvement of the voluntary sector, rapid response and discharge tools, acute discharge support.                                                                                                                                                                                                                       |                                                                                                                                                                       |         |
| Worcestershire | Whole population with focus on older people and people with long term conditions | Integrated commissioning through a shared funding of the oversight board, a shared vision, and community engagement.<br>Integrated care through service and clinical integration over organisational integration, reorganised acute care, multidisciplinary teams with involvement of the voluntary sector.<br>6 Transformation programme areas: Urgent Care; Out of hospital care; Specialised Commissioning; Acute Hospital Services; Future Lives; Children and Young People’s Plan. | Virtual ward and integrated team projects.<br>Assistive technology for self-care and self-monitoring.<br>Improving Patient Flow strategy.<br>Personal Health Budgets. | Outcome |

## 2. Local Authority to Pioneer Lookup

| Local Authority Code | Local Authority           | Pioneer                                 |
|----------------------|---------------------------|-----------------------------------------|
| E0800016             | Barnsley                  | Barnsley                                |
| E06000050            | Cheshire West and Chester | Cheshire                                |
| E06000049            | Cheshire East             | Cheshire                                |
| E06000052            | Cornwall                  | Cornwall and Isles of Scilly            |
| E06000053            | Isles of Scilly           | Cornwall and Isles of Scilly            |
| E09000011            | Greenwich                 | Greenwich                               |
| E09000019            | Islington                 | Islington                               |
| E07000105            | Ashford                   | Kent                                    |
| E07000106            | Canterbury                | Kent                                    |
| E07000107            | Dartford                  | Kent                                    |
| E07000108            | Dover                     | Kent                                    |
| E07000109            | Gravesham                 | Kent                                    |
| E07000110            | Maidstone                 | Kent                                    |
| E07000111            | Sevenoaks                 | Kent                                    |
| E07000112            | Shepway                   | Kent                                    |
| E07000113            | Swale                     | Kent                                    |
| E07000114            | Thanet                    | Kent                                    |
| E07000115            | Tonbridge and Malling     | Kent                                    |
| E07000116            | Tunbridge Wells           | Kent                                    |
| E08000035            | Leeds                     | Leeds                                   |
| E09000005            | Brent                     | North West London                       |
| E09000009            | Ealing                    | North West London                       |
| E09000013            | Hammersmith and Fulham    | North West London                       |
| E09000015            | Harrow                    | North West London                       |
| E09000017            | Hillingdon                | North West London                       |
| E09000018            | Hounslow                  | North West London                       |
| E09000020            | Kensington and Chelsea    | North West London                       |
| E09000033            | Westminster               | North West London                       |
| E06000027            | Torbay                    | South Devon and Torbay                  |
| E07000044            | South Hams                | South Devon and Torbay                  |
| E07000045            | Teignbridge               | South Devon and Torbay                  |
| E08000023            | South Tyneside            | South Tyneside                          |
| E06000033            | Southend-on-Sea           | Southend                                |
| E07000192            | Cannock Chase             | Stoke and North Staffordshire           |
| E07000194            | Lichfield                 | Stoke and North Staffordshire           |
| E07000195            | Newcastle-under-Lyme      | Stoke and North Staffordshire           |
| E07000197            | Stafford                  | Stoke and North Staffordshire           |
| E07000198            | Staffordshire Moorlands   | Stoke and North Staffordshire           |
| E06000021            | Stoke-on-Trent            | Stoke and North Staffordshire           |
| E07000196            | South Staffordshire       | Stoke and North Staffordshire           |
| E09000031            | Waltham Forest            | Waltham Forest and East London and City |
| E09000025            | Newham                    | Waltham Forest and East London and City |
| E09000030            | Tower Hamlets             | Waltham Forest and East London and City |
| E07000234            | Bromsgrove                | Worcestershire                          |

1  
2  
3  
4  
5  
6  
7  
8  
9  
10  
11  
12  
13  
14  
15  
16  
17  
18  
19  
20  
21  
22  
23  
24  
25  
26  
27  
28  
29  
30  
31  
32  
33  
34  
35  
36  
37  
38  
39  
40  
41  
42  
43  
44  
45  
46  
47  
48  
49  
50  
51  
52  
53  
54  
55  
56  
57  
58  
59  
60

|           |               |                |
|-----------|---------------|----------------|
| E07000235 | Malvern Hills | Worcestershire |
| E07000236 | Redditch      | Worcestershire |
| E07000237 | Worcester     | Worcestershire |
| E07000238 | Wychavon      | Worcestershire |
| E07000239 | Wyre Forest   | Worcestershire |

For peer review only

### 3. Emergency admission rates for individual local authorities within Pioneers at baseline and follow up, with percentage differences compared to baseline

| Local Authority Code | Local Authority              | Emergency Admission Rate |         |         | Percentage Difference |         |
|----------------------|------------------------------|--------------------------|---------|---------|-----------------------|---------|
|                      |                              | Baseline                 | 2014/15 | 2015/16 | 2014/15               | 2015/16 |
| E08000016            | Barnsley                     | 10,992                   | 11,769  | 12,325  | 7.07%                 | 12.13%  |
| E06000049            | Cheshire East                | 11,485                   | 12,537  | 12,954  | 9.17%                 | 12.80%  |
| E06000050            | Cheshire West and Chester    | 11,033                   | 11,782  | 11,963  | 6.79%                 | 8.42%   |
| E06000052/53         | Cornwall and Isles of Scilly | 8,170                    | 8,061   | 8,193   | -1.33%                | 0.29%   |
| E09000011            | Greenwich                    | 8,168                    | 8,226   | 9,513   | 0.71%                 | 16.47%  |
| E09000019            | Islington                    | 6,324                    | 6,320   | 6,096   | -0.06%                | -3.60%  |
| E07000105            | Ashford                      | 8,708                    | 9,785   | 10,506  | 12.37%                | 20.65%  |
| E07000106            | Canterbury                   | 9,663                    | 10,503  | 10,499  | 8.70%                 | 8.66%   |
| E07000107            | Dartford                     | 10,325                   | 12,037  | 11,063  | 16.59%                | 7.15%   |
| E07000108            | Dover                        | 9,201                    | 10,411  | 10,809  | 13.14%                | 17.47%  |
| E07000109            | Gravesham                    | 9,529                    | 10,825  | 10,379  | 13.60%                | 8.92%   |
| E07000110            | Maidstone                    | 9,553                    | 10,470  | 10,219  | 9.60%                 | 6.97%   |
| E07000111            | Sevenoaks                    | 8,420                    | 8,842   | 8,114   | 5.01%                 | -3.64%  |
| E07000112            | Shepway                      | 8,921                    | 9,566   | 10,274  | 7.24%                 | 15.17%  |
| E07000113            | Swale                        | 10,590                   | 10,746  | 12,117  | 1.47%                 | 14.42%  |
| E07000114            | Thanet                       | 9,245                    | 9,952   | 10,194  | 7.65%                 | 10.27%  |
| E07000115            | Tonbridge and Malling        | 8,842                    | 8,632   | 8,448   | -2.37%                | -4.46%  |
| E07000116            | Tunbridge Wells              | 9,188                    | 8,631   | 7,483   | -6.06%                | -18.55% |
| E08000035            | Leeds                        | 11,399                   | 9,605   | 10,155  | -15.74%               | -10.91% |
| E09000005            | Brent                        | 8,882                    | 8,541   | 8,425   | -3.84%                | -5.15%  |
| E09000009            | Ealing                       | 10,246                   | 9,828   | 10,398  | -4.08%                | 1.49%   |
| E09000013            | Hammersmith and Fulham       | 10,312                   | 9,588   | 9,876   | -7.03%                | -4.23%  |
| E09000015            | Harrow                       | 8,397                    | 8,430   | 8,084   | 0.39%                 | -3.73%  |
| E09000017            | Hillingdon                   | 9,753                    | 9,636   | 9,346   | -1.20%                | -4.18%  |
| E09000018            | Hounslow                     | 8,998                    | 9,751   | 11,053  | 8.36%                 | 22.83%  |
| E09000020            | Kensington and Chelsea       | 7,688                    | 7,094   | 7,048   | -7.73%                | -8.32%  |
| E09000033            | Westminster                  | 7,095                    | 6,454   | 6,266   | -9.04%                | -11.70% |
| E07000044            | South Hams                   | 6,591                    | 6,413   | 6,962   | -2.69%                | 5.63%   |
| E07000045            | Teignbridge                  | 7,657                    | 8,182   | 9,275   | 6.86%                 | 21.13%  |
| E06000027            | Torbay                       | 7,998                    | 8,296   | 10,173  | 3.72%                 | 27.19%  |
| E08000023            | South Tyneside               | 11,153                   | 10,445  | 11,150  | -6.35%                | -0.03%  |
| E06000033            | Southend-on-Sea              | 9,243                    | 10,397  | 10,224  | 12.49%                | 10.61%  |
| E07000192            | Cannock Chase                | 10,438                   | 10,611  | 10,083  | 1.66%                 | -3.40%  |
| E07000194            | Lichfield                    | 8,754                    | 9,424   | 9,971   | 7.65%                 | 13.90%  |
| E07000195            | Newcastle-under-Lyme         | 11,919                   | 12,034  | 12,625  | 0.96%                 | 5.92%   |
| E07000196            | South Staffordshire          | 8,353                    | 8,907   | 9,575   | 6.64%                 | 14.63%  |
| E07000197            | Stafford                     | 10,289                   | 10,441  | 9,900   | 1.47%                 | -3.78%  |
| E07000198            | Staffordshire Moorlands      | 8,448                    | 8,649   | 9,162   | 2.37%                 | 8.45%   |
| E06000021            | Stoke-on-Trent               | 11,438                   | 11,704  | 12,959  | 2.32%                 | 13.29%  |

|           |                |        |        |        |         |         |
|-----------|----------------|--------|--------|--------|---------|---------|
| E09000025 | Newham         | 7,897  | 7,535  | 7,802  | -4.58%  | -1.20%  |
| E09000030 | Tower Hamlets  | 10,166 | 9,103  | 8,795  | -10.45% | -13.49% |
| E09000031 | Waltham Forest | 9,489  | 9,333  | 8,242  | -1.64%  | -13.14% |
| E07000234 | Bromsgrove     | 8,452  | 9,292  | 9,165  | 9.94%   | 8.43%   |
| E07000235 | Malvern Hills  | 8,289  | 7,937  | 7,360  | -4.25%  | -11.21% |
| E07000236 | Redditch       | 10,556 | 10,650 | 11,534 | 0.89%   | 9.26%   |
| E07000237 | Worcester      | 9,858  | 9,180  | 9,705  | -6.88%  | -1.56%  |
| E07000238 | Wychavon       | 9,094  | 8,475  | 8,760  | -6.81%  | -3.68%  |
| E07000239 | Wyre Forest    | 7,855  | 7,366  | 7,511  | -6.23%  | -4.38%  |

#### 4. Sensitivity analysis: excluding Stoke and North Staffordshire Pioneer

|                                                        | 2014/15           | 2015/16           |
|--------------------------------------------------------|-------------------|-------------------|
| <b>Model Coefficients (p value)</b>                    |                   |                   |
| Intercept                                              | -5.4279 (<0.0001) | -5.4297 (<0.0001) |
| Non-Pioneer/Pioneer                                    | -0.0205 (0.3009)  | -0.0204 (0.3023)  |
| Baseline/Follow-Up                                     | 0.0487 (<0.0001)  | 0.0634 (<0.0001)  |
| Interaction                                            | -0.0302 (0.0489)  | -0.0254 (0.1717)  |
| <b>Percentage Difference [95% confidence interval]</b> |                   |                   |
| Non-Pioneer                                            | 4.99 [3.81,6.18]  | 6.54 [5.21,7.89]  |
| Pioneer                                                | 1.86 [-0.85,4.65] | 3.87 [0.43,7.42]  |

Parallel trends interaction term p value = 0.3130

#### 5. Sensitivity analysis: individual baseline years compared to 2014/15

| Baseline Year                                          | 2010/11           | 2011/12           | 2012/13           |
|--------------------------------------------------------|-------------------|-------------------|-------------------|
| <b>Parallel Trends P Value</b>                         | 0.8272            | 0.3425            | 0.9235            |
| <b>Model Coefficients (p value)</b>                    |                   |                   |                   |
| Intercept                                              | -5.4173 (<0.0001) | -5.4524 (<0.0001) | -5.4144 (<0.0001) |
| Non-Pioneer/Pioneer                                    | -0.0027 (0.9005)  | -0.0034 (0.8652)  | -0.0058 (0.7514)  |
| Baseline/Time 2                                        | 0.0517 (<0.0001)  | 0.0522 (<0.0001)  | 0.0698 (<0.00001) |
| Interaction                                            | -0.0290 (0.0916)  | -0.0285 (0.0730)  | -0.0258 (0.0195)  |
| <b>Percentage Difference [95% confidence interval]</b> |                   |                   |                   |
| Non-Pioneer                                            | 5.30 [3.93,6.70]  | 5.36 [4.09,6.63]  | 7.23 [6.07,8.40]  |
| Pioneer                                                | 2.29 [-0.95,5.64] | 2.40 [0.46,5.34]  | 4.50 [2.48,6.55]  |



## STROBE Statement—checklist of items that should be included in reports of observational studies

|                              | Item No | Recommendation                                                                                                                                                                                                                                                                                                                                                                                                                                                         | Page No |
|------------------------------|---------|------------------------------------------------------------------------------------------------------------------------------------------------------------------------------------------------------------------------------------------------------------------------------------------------------------------------------------------------------------------------------------------------------------------------------------------------------------------------|---------|
| <b>Title and abstract</b>    | 1       | (a) Indicate the study's design with a commonly used term in the title or the abstract                                                                                                                                                                                                                                                                                                                                                                                 | 1       |
|                              |         | (b) Provide in the abstract an informative and balanced summary of what was done and what was found                                                                                                                                                                                                                                                                                                                                                                    | 2-3     |
| <b>Introduction</b>          |         |                                                                                                                                                                                                                                                                                                                                                                                                                                                                        |         |
| Background/rationale         | 2       | Explain the scientific background and rationale for the investigation being reported                                                                                                                                                                                                                                                                                                                                                                                   | 4-5     |
| Objectives                   | 3       | State specific objectives, including any prespecified hypotheses                                                                                                                                                                                                                                                                                                                                                                                                       | 5       |
| <b>Methods</b>               |         |                                                                                                                                                                                                                                                                                                                                                                                                                                                                        |         |
| Study design                 | 4       | Present key elements of study design early in the paper                                                                                                                                                                                                                                                                                                                                                                                                                | 6       |
| Setting                      | 5       | Describe the setting, locations, and relevant dates, including periods of recruitment, exposure, follow-up, and data collection                                                                                                                                                                                                                                                                                                                                        | 6-7     |
| Participants                 | 6       | (a) <i>Cohort study</i> —Give the eligibility criteria, and the sources and methods of selection of participants. Describe methods of follow-up<br><i>Case-control study</i> —Give the eligibility criteria, and the sources and methods of case ascertainment and control selection. Give the rationale for the choice of cases and controls<br><i>Cross-sectional study</i> —Give the eligibility criteria, and the sources and methods of selection of participants | 6-7     |
|                              |         | (b) <i>Cohort study</i> —For matched studies, give matching criteria and number of exposed and unexposed<br><i>Case-control study</i> —For matched studies, give matching criteria and the number of controls per case                                                                                                                                                                                                                                                 | -       |
| Variables                    | 7       | Clearly define all outcomes, exposures, predictors, potential confounders, and effect modifiers. Give diagnostic criteria, if applicable                                                                                                                                                                                                                                                                                                                               | 6-7     |
| Data sources/<br>measurement | 8*      | For each variable of interest, give sources of data and details of methods of assessment (measurement). Describe comparability of assessment methods if there is more than one group                                                                                                                                                                                                                                                                                   | 6-7     |
| Bias                         | 9       | Describe any efforts to address potential sources of bias                                                                                                                                                                                                                                                                                                                                                                                                              | 8       |
| Study size                   | 10      | Explain how the study size was arrived at                                                                                                                                                                                                                                                                                                                                                                                                                              | -       |
| Quantitative variables       | 11      | Explain how quantitative variables were handled in the analyses. If applicable, describe which groupings were chosen and why                                                                                                                                                                                                                                                                                                                                           | 7-8     |
| Statistical methods          | 12      | (a) Describe all statistical methods, including those used to control for confounding                                                                                                                                                                                                                                                                                                                                                                                  | 7-8     |
|                              |         | (b) Describe any methods used to examine subgroups and interactions                                                                                                                                                                                                                                                                                                                                                                                                    | -       |
|                              |         | (c) Explain how missing data were addressed                                                                                                                                                                                                                                                                                                                                                                                                                            | -       |
|                              |         | (d) <i>Cohort study</i> —If applicable, explain how loss to follow-up was addressed<br><i>Case-control study</i> —If applicable, explain how matching of cases and controls was addressed<br><i>Cross-sectional study</i> —If applicable, describe analytical methods taking account of sampling strategy                                                                                                                                                              | -       |
|                              |         | (e) Describe any sensitivity analyses                                                                                                                                                                                                                                                                                                                                                                                                                                  | 8       |

Continued on next page

1  
2  
3  
4  
5  
6  
7  
8  
9  
10  
11  
12  
13  
14  
15  
16  
17  
18  
19  
20  
21  
22  
23  
24  
25  
26  
27  
28  
29  
30  
31  
32  
33  
34  
35  
36  
37  
38  
39  
40  
41  
42  
43  
44  
45  
46  
47  
48  
49  
50  
51  
52  
53  
54  
55  
56  
57  
58  
59  
60**Results**

|                  |     |                                                                                                                                                                                                              |      |
|------------------|-----|--------------------------------------------------------------------------------------------------------------------------------------------------------------------------------------------------------------|------|
| Participants     | 13* | (a) Report numbers of individuals at each stage of study—eg numbers potentially eligible, examined for eligibility, confirmed eligible, included in the study, completing follow-up, and analysed            | 9    |
|                  |     | (b) Give reasons for non-participation at each stage                                                                                                                                                         | -    |
|                  |     | (c) Consider use of a flow diagram                                                                                                                                                                           | -    |
| Descriptive data | 14* | (a) Give characteristics of study participants (eg demographic, clinical, social) and information on exposures and potential confounders                                                                     | 9    |
|                  |     | (b) Indicate number of participants with missing data for each variable of interest                                                                                                                          | -    |
|                  |     | (c) <i>Cohort study</i> —Summarise follow-up time (eg, average and total amount)                                                                                                                             | -    |
| Outcome data     | 15* | <i>Cohort study</i> —Report numbers of outcome events or summary measures over time                                                                                                                          | -    |
|                  |     | <i>Case-control study</i> —Report numbers in each exposure category, or summary measures of exposure                                                                                                         | -    |
|                  |     | <i>Cross-sectional study</i> —Report numbers of outcome events or summary measures                                                                                                                           | 9-10 |
| Main results     | 16  | (a) Give unadjusted estimates and, if applicable, confounder-adjusted estimates and their precision (eg, 95% confidence interval). Make clear which confounders were adjusted for and why they were included | 9-11 |
|                  |     | (b) Report category boundaries when continuous variables were categorized                                                                                                                                    | -    |
|                  |     | (c) If relevant, consider translating estimates of relative risk into absolute risk for a meaningful time period                                                                                             | -    |
| Other analyses   | 17  | Report other analyses done—eg analyses of subgroups and interactions, and sensitivity analyses                                                                                                               | -    |

**Discussion**

|                  |    |                                                                                                                                                                            |       |
|------------------|----|----------------------------------------------------------------------------------------------------------------------------------------------------------------------------|-------|
| Key results      | 18 | Summarise key results with reference to study objectives                                                                                                                   | 11    |
| Limitations      | 19 | Discuss limitations of the study, taking into account sources of potential bias or imprecision. Discuss both direction and magnitude of any potential bias                 | 12-13 |
| Interpretation   | 20 | Give a cautious overall interpretation of results considering objectives, limitations, multiplicity of analyses, results from similar studies, and other relevant evidence | 12-13 |
| Generalisability | 21 | Discuss the generalisability (external validity) of the study results                                                                                                      | 12-14 |

**Other information**

|         |    |                                                                                                                                                               |    |
|---------|----|---------------------------------------------------------------------------------------------------------------------------------------------------------------|----|
| Funding | 22 | Give the source of funding and the role of the funders for the present study and, if applicable, for the original study on which the present article is based | 15 |
|---------|----|---------------------------------------------------------------------------------------------------------------------------------------------------------------|----|

\*Give information separately for cases and controls in case-control studies and, if applicable, for exposed and unexposed groups in cohort and cross-sectional studies.

**Note:** An Explanation and Elaboration article discusses each checklist item and gives methodological background and published examples of transparent reporting. The STROBE checklist is best used in conjunction with this article (freely available on the Web sites of PLoS Medicine at <http://www.plosmedicine.org/>, Annals of Internal Medicine at <http://www.annals.org/>, and Epidemiology at <http://www.epidem.com/>). Information on the STROBE Initiative is available at [www.strobe-statement.org](http://www.strobe-statement.org).

# BMJ Open

## Area level impacts on emergency hospital admissions of the Integrated Care and Support Pioneer Programme in England: difference-in-differences analysis

|                                 |                                                                                                                                                                                                                                                                                                                                                                                                                                                                                                                                                                                             |
|---------------------------------|---------------------------------------------------------------------------------------------------------------------------------------------------------------------------------------------------------------------------------------------------------------------------------------------------------------------------------------------------------------------------------------------------------------------------------------------------------------------------------------------------------------------------------------------------------------------------------------------|
| Journal:                        | <i>BMJ Open</i>                                                                                                                                                                                                                                                                                                                                                                                                                                                                                                                                                                             |
| Manuscript ID                   | bmjopen-2018-026509.R2                                                                                                                                                                                                                                                                                                                                                                                                                                                                                                                                                                      |
| Article Type:                   | Research                                                                                                                                                                                                                                                                                                                                                                                                                                                                                                                                                                                    |
| Date Submitted by the Author:   | 12-Jul-2019                                                                                                                                                                                                                                                                                                                                                                                                                                                                                                                                                                                 |
| Complete List of Authors:       | Keeble, Eilís; The Nuffield Trust<br>Bardsley, M; The Health Foundation<br>Durand, Mary Alison; London School of Hygiene and Tropical Medicine, Policy Innovation and Evaluation Research Unit, Department of Health Services Research and Policy<br>Hoomans, Ties ; London School of Hygiene and Tropical Medicine, Policy Innovation and Evaluation Research Unit, Department of Health Services Research and Policy<br>Mays, Nicholas; London School of Hygiene and Tropical Medicine, Policy Innovation and Evaluation Research Unit, Department of Health Services Research and Policy |
| <b>Primary Subject Heading</b>: | Health services research                                                                                                                                                                                                                                                                                                                                                                                                                                                                                                                                                                    |
| Secondary Subject Heading:      | Health policy                                                                                                                                                                                                                                                                                                                                                                                                                                                                                                                                                                               |
| Keywords:                       | Quality in health care < HEALTH SERVICES ADMINISTRATION & MANAGEMENT, STATISTICS & RESEARCH METHODS, Organisation of health services < HEALTH SERVICES ADMINISTRATION & MANAGEMENT, Health policy < HEALTH SERVICES ADMINISTRATION & MANAGEMENT                                                                                                                                                                                                                                                                                                                                             |
|                                 |                                                                                                                                                                                                                                                                                                                                                                                                                                                                                                                                                                                             |

SCHOLARONE™  
Manuscripts

1  
2  
3 **Area level impacts on emergency hospital admissions of the Integrated Care and**  
4 **Support Pioneer Programme in England: difference-in-differences analysis**  
5  
6  
7

8 Corresponding author: Eilís Keeble, The Nuffield Trust, 59 New Cavendish Street, London,  
9 W1G 7LP, United Kingdom, email: eilis.keeble@nuffieldtrust.org.uk, phone: 0207 631 8450  
10  
11

12 Martin Bardsley, The Health Foundation (Formerly of The Nuffield Trust), London, United  
13 Kingdom  
14  
15

16  
17 Mary Alison Durand, Policy Innovation and Evaluation Research Unit, Department of Health  
18 Services Research and Policy, London School of Hygiene and Tropical Medicine, London,  
19 United Kingdom  
20  
21

22  
23 Ties Hoomans, Policy Innovation and Evaluation Research Unit, Department of Health  
24 Services Research and Policy, London School of Hygiene and Tropical Medicine, London,  
25 United Kingdom  
26  
27

28  
29 Nicholas Mays, Policy Innovation and Evaluation Research Unit, Department of Health  
30 Services Research and Policy, London School of Hygiene and Tropical Medicine, London,  
31 United Kingdom  
32  
33

34  
35  
36 Word Count: 3,248  
37  
38  
39  
40  
41  
42  
43  
44  
45  
46  
47  
48  
49  
50  
51  
52  
53  
54  
55  
56  
57  
58  
59  
60

## ABSTRACT

### Objective

To examine whether any differential change in emergency admissions could be attributed to integrated care by comparing Pioneer and non-Pioneer populations from a pre-Pioneer baseline period (April 2010 to March 2013) over two follow-up periods: to 2014/15 and to 2015/16.

### Design

Difference-in-differences analysis of emergency hospital admissions from English Hospital Episode Statistics (HES).

### Setting

Local authorities in England classified as either Pioneer or non-Pioneer.

### Participants

Emergency admissions to all NHS hospitals in England with local authority determined by area of residence of the patient.

### Intervention

Wave 1 of the Integrated Care and Support Pioneer Programme announced in November 2013.

### Primary Outcome Measure

Change in hospital emergency admissions.

### Results

The increase in the Pioneer emergency admission rate from baseline to 2014/15 was smaller at 1.98 per cent and significantly different from that of the non-Pioneers at 4.85 per cent ( $p=0.0395$ ). The increase in the Pioneer emergency admission rate from baseline to 2015/16 was again smaller than for the non-Pioneers but the difference was not statistically significant ( $p=0.1905$ ).

### Conclusions

It is ambitious to expect unequivocal changes in a high level and indirect indicator of health and social care integration such as emergency hospital admissions to arise as a result of the

1  
2  
3 changes in local health and social care provision across organisations brought about by the  
4 Pioneers in their early years. We should treat any sign that the Pioneers have had such an  
5 impact with caution. Nevertheless, there does seem to be an indication from the current  
6 analysis that there were some changes in hospital use associated with the first year of Pioneer  
7 status that are worthy of further exploration.  
8  
9  
10  
11  
12  
13

#### 14 **STRENGTHS AND LIMITATIONS OF THIS STUDY**

- 16 1. This study adds to the evidence of the impact of system-wide approaches to  
17 integrating health and social care, like the Integrated Care and Support Pioneer  
18 Programme, using advanced statistical methods to determine whether the Pioneers  
19 reduced emergency admissions.  
20  
21  
22
- 23 2. Reducing emergency admissions is often cited as a key goal of new integrated models  
24 of care and the Hospital Episode Statistics provide a continuously collected person  
25 level dataset to enable tracking of changes over time at small area level.  
26  
27  
28
- 29 3. Analysing the Pioneer sites collectively ensured the inclusion of a diverse range of  
30 areas which were unlikely to be systematically different at baseline from the non-  
31 Pioneers.  
32  
33
- 34 4. It is difficult to find a true counter-factual population to compare with the Pioneers as  
35 many other initiatives related to health and social care integration had been  
36 developed in other areas of the country previously and/or were being implemented  
37 almost simultaneously.  
38  
39  
40
- 41 5. The Pioneers invested in a collection of health and social care integration strategies  
42 and interventions; identifying the causes and effects of these specific initiatives would  
43 require detailed local primary data collection but this analysis focuses on the overall  
44 impact of the Pioneers as a national policy initiative.  
45  
46  
47  
48  
49  
50

#### 51 **KEYWORDS**

52  
53 Organisation of health services, quality in health care, health policy, statistics and research  
54 methods  
55  
56  
57  
58  
59  
60

## INTRODUCTION

In November 2013, the Integrated Care and Support Pioneer programme was initiated in England. The programme aimed to promote integration between the separate local health and social care systems in England by facilitating these systems to develop and implement new ways of working together with the objective of meeting people's needs better and improving service users' experience of care .[1]

In the first wave of the programme the English Department of Health (DH) (now Department of Health and Social Care (DHSC)) selected 14 Pioneer areas from a round of competitive applications, that were identified as the "most ambitious and visionary" in their plans for health and social care system integration.[2] Each Pioneer was given access to limited support and expertise over a five-year period and a one-off fund of £90,000 to help with initial development. A second wave of 11 Pioneer areas was subsequently announced in January 2015. These are excluded from the present analysis as there are insufficient time points available currently for an interpretable trend analysis.

Integration in the Pioneer areas has taken on different forms. As Erens and colleagues noted, *"What it meant to be 'a Pioneer' varied between sites and between individuals within sites. At various times it was apparent that Pioneer status meant one or more of the following:*

- *a 'badge' for a locality signifying national recognition of innovation and progress in integrating care*
- *an enabler of the existing local plan for transformation*
- *a particular governance arrangement, for example a Board that brought all system leaders and their organisations around the table*
- *a collection of discrete workstreams, characteristically covering a combination of different groups of users and infrastructure projects (for example, information sharing, workforce development, etc.)*
- *a specific new integrated service, such as a frailty service*
- *an ethos or way of thinking about and providing care, rather than a specific plan or set of initiatives"*[3]

1  
2  
3 Some of the Pioneers planned to focus on specific populations. Of these, the most common  
4 were older people, people with long term conditions and people at high risk of hospitalisation.  
5  
6 Broadly, however, the Pioneers shared the same vision for the future of the health and social  
7 care system by seeking to create a 'whole system' of integrated care involving all local bodies  
8 and professional groups organised around the needs of individuals and their informal carers  
9 which set them apart from the rest of England.[4]  
10  
11  
12  
13  
14

15 All but one (Stoke and North Staffordshire) of the Wave 1 Pioneers stated that reducing  
16 emergency admissions was an aim or an expected outcome of integration in their original bid.  
17 Risk stratification with targeted interventions and introducing preventive strategies to avoid  
18 the need for acute hospitalisation were listed as activities to achieve this goal (see  
19 supplementary material). The focus on reducing emergency hospital care use was given still  
20 greater emphasis by the Pioneers as financial austerity bit more deeply into local health care  
21 budgets after 2013.[3]  
22  
23  
24  
25  
26  
27  
28

29 As a consequence of the focus on emergency hospital care as a costly service, the success of  
30 integrated care initiatives has often been presented, at least in part, in terms of their ability  
31 to reduce the need for emergency hospital admissions and to reduce emergency admission  
32 rates.[5] Reducing emergency admission rates has been a feature of English health policy over  
33 the past decade and continues to be one of the most commonly used measures of success for  
34 system change initiatives.[6–8] To date, however, there has been little evidence of initiatives  
35 successfully reducing emergency admissions.[9–11]  
36  
37  
38  
39  
40  
41

42 This paper presents new evidence on the effect of the Pioneer programme on emergency  
43 admissions. We investigate changes in the emergency admissions to hospitals of patients  
44 across England following the implementation of the programme in 2013. The analysis is part  
45 of a wider programme of evaluation of the Pioneers  
46 ([http://piru.lshtm.ac.uk/projects/current-projects/integrated-care-pioneers-  
48 evaluation.html](http://piru.lshtm.ac.uk/projects/current-projects/integrated-care-pioneers-<br/>47 evaluation.html)). Though it is not possible to identify precisely which elements of the  
49 programme, if any, led to any differential change observed (since the Pioneers were not  
50 working from an agreed template), such an analysis can be justified as a necessary step in  
51 understanding the impacts of a major initiative such as the Integrated Care and Support  
52 Pioneer programme, especially since it had much in common with successive initiatives such  
53  
54  
55  
56  
57  
58  
59  
60



1  
2  
3 as the New Care Model Vanguard and the current focus on Integrated Care Systems  
4 (ICSs).[12-13] The underlying hypothesis is that the cumulative effect of the specific initiatives  
5 embedded in each Pioneer programme would bring about sufficient change in emergency  
6 hospital care use as to be detectable at the level of the whole population of the Pioneers.  
7  
8  
9

## 10 11 **METHODS**

12  
13  
14 To examine whether differential change in emergency admissions could be attributed to  
15 Pioneer status we used a difference-in-differences approach. Difference-in-differences  
16 measures the effect of the intervention (the Pioneer programme) by looking at the change in  
17 emergency admissions between the pre- and post- intervention periods in the two groups  
18 and quantifies whether or not the population within the Pioneer programme experiences a  
19 change that is significantly different to the comparison group, the non-Pioneers.  
20  
21  
22  
23  
24

### 25 26 **Data Sources**

27  
28 We used inpatient Hospital Episode Statistics (HES) to identify all emergency admissions to  
29 NHS hospitals in Pioneer and non-Pioneer areas across England. HES is collated by NHS Digital  
30 and is a pseudonymous patient level dataset that records basic features of admissions to  
31 hospital including: patient age, sex, admission date and an emergency admission indicator  
32 (admission methods starting with "2").[14]  
33  
34  
35  
36  
37

38 To be able to compare emergency admission rates between areas (Pioneer/non-Pioneer), we  
39 also obtained information on key local authority level factors determining local population  
40 health and care needs:  
41  
42

- 43  
44 • Demographic composition (age and sex), from the Office for National Statistics  
45 (ONS).[15]  
46
- 47  
48 • Deprivation decile, from the 2015 Index of Multiple Deprivation.[16]  
49

### 50 51 **Defining Pioneer Areas**

52  
53 The Pioneer areas did not all map neatly to a single set of health or local government  
54 administrative boundaries. After consultation with each Pioneer, they were mapped to the  
55 local authorities which most closely aligned with the intervention area (see supplementary  
56 material for lookup table). Local authority boundaries were used instead of health boundaries  
57 as the population denominators could be linked over a longer period. A wider breadth of data  
58  
59  
60

1  
2  
3 is available for this boundary which is being used in other parts of the evaluation, for example  
4 social care data.  
5  
6

7  
8 The local authorities which were linked to the second wave of Pioneers, initiated in January  
9 2015, were excluded from all analyses and not included in either the Pioneer or non-Pioneer  
10 populations. Non-Pioneer areas were defined as any local authority that was not a first or  
11 second wave Pioneer.  
12  
13  
14

### 15 16 **Defining Time Periods**

17 A baseline period before Pioneer programme implementation of April 2010 to March 2013  
18 was compared to two follow-up periods: April 2014 to March 2015 (2014/15) and April 2015  
19 to March 2016 (2015/16). The period April 2013 to March 2014 was excluded as this  
20 encompassed the call for applications to the programme (May 2013) and the announcement  
21 of the sites (November 2013).  
22  
23  
24  
25  
26

### 27 28 **Outcome**

29 Our primary outcome was the average percentage difference in rates of emergency hospital  
30 admissions per 100,000 between baseline and follow-up (2014/15 or 2015/16) for the study  
31 groups (Pioneers/non-Pioneers). Area-level rates were calculated as the total number of  
32 emergency admissions over each time period divided by the mid-year population for each  
33 group. Admissions were derived by month and local authority of residence. They were  
34 adjusted for deprivation decile, age group (0-19, 20-39, 40-59, 60-79, 80+) and sex. The  
35 English age, sex and deprivation decile structure was used as the reference population for  
36 each local authority for the initial analysis. The secondary outcome was the difference in  
37 average percentage change in the rates over time between the Pioneers and non-Pioneers.  
38  
39  
40  
41  
42  
43  
44  
45  
46

### 47 48 **Statistical Analyses**

49 An initial difference-in-differences comparison was performed by looking at the change in the  
50 adjusted emergency admission rate for the Pioneers and non-Pioneers. Percentage  
51 differences between the baseline period and the two follow-up time points of 2014/15 and  
52 2015/16 were calculated, along with the difference between these.  
53  
54  
55  
56

57 To determine whether the change in emergency admissions in the Pioneers was significantly  
58 different from the change in the non-Pioneers, we performed difference-in-differences  
59  
60

1  
2  
3 regression analysis. We estimated negative binomial regression models for count data  
4 adjusting for age, sex and deprivation decile. Poisson models were first attempted but the  
5 data were over-dispersed and unsuitable. Each regression model included a continuous local  
6 authority population size exposure variable, a binary Pioneer status term (Pioneer/non-  
7 Pioneer), a binary time term (baseline/follow-up), a difference-in-differences term (Pioneer  
8 status\*time) and covariate terms. We obtained robust standard error estimates adjusting for  
9 clustering of the repeated measures from each local authority. Significance was assessed at  
10  $p < 0.05$ . SAS 9.4® was used for all analyses.  
11  
12  
13  
14  
15  
16  
17

### 18 **Difference-in-Differences Estimation Validation Tests**

19 To validate our difference-in-difference estimations, we tested the following assumptions:  
20  
21

- 22  
23 1. That areas were not selected into the Programme based on emergency admission rates  
24 at baseline, by comparing baseline emergency admissions and demographics of the  
25 Pioneer and non-Pioneers.  
26  
27
- 28  
29 2. That changes in emergency admission rates over time would be the same for both the  
30 Pioneer and non-Pioneer areas in the absence of the Pioneer programme, by comparing  
31 adjusted emergency admission rates for the Pioneers and non-Pioneers over the baseline  
32 period. These were compared graphically and statistically using a linear time trend of  
33 month in the baseline period interacted with Pioneer status controlling for age, sex and  
34 deprivation decile.  
35  
36  
37  
38  
39

### 40 **Sensitivity Analyses**

41 We examined sensitivity of the main findings to excluding Stoke and North Staffordshire  
42 Pioneer from our analyses and to using individual years for the baseline period (see  
43 supplementary material). Stoke and North Staffordshire had a unique target population and  
44 no focus on reducing emergency admissions. As the baseline period covered three years, each  
45 individual baseline year was also compared to the first follow-up time point.  
46  
47  
48  
49  
50  
51

### 52 **Patient and Public Involvement**

53 Patient and public representatives are involved in the wider evaluation of which this analysis  
54 forms a part and were involved in the selection and peer review of the initial proposal on  
55 which this analysis is based.  
56  
57  
58  
59  
60

## RESULTS

### Baseline Characteristics

The characteristics of the Pioneers and non-Pioneers during the baseline period of April 2010 to March 2013 are summarised in Table 1. The Pioneers consisted of 49 local authorities and encompassed 17 percent of the English population in the baseline period.[15] The proportions of the population aged 65 and over, or female, were similar between the two groups. Area level deprivation in the Pioneers was slightly higher than in the non-Pioneers.

Table 1 Baseline Characteristics of the Pioneer and non-Pioneer populations

| Characteristic                           | Pioneers<br>First Wave<br>(n = 14)* | Non-Pioneers |
|------------------------------------------|-------------------------------------|--------------|
| Number of Local Authorities              | 49                                  | 244          |
| Average Yearly Population at Baseline    | 9,083,051                           | 37,137,613   |
| Proportion Population Under 20           | 24%                                 | 24%          |
| Proportion Population Aged 65+           | 16%                                 | 17%          |
| Proportion Population Female             | 50%                                 | 50%          |
| Average Local Authority IMD Score (2015) | 21.1                                | 18.7         |

\* 11 second wave Pioneers and 33 associated local authorities were excluded from the analyses

### Trend Analysis

Figure 1 shows the adjusted monthly emergency admission rates for the Pioneers and non-Pioneers between April 2010 and March 2016. On visual inspection, the trends in the baseline period overlap which indicates that trend bias should have limited impact on the difference-in-differences analysis. A statistical test of the trends in the baseline period also indicated limited trend bias ( $p=0.7378$ ).

### Difference-in-Differences

Between the baseline period and the first follow-up period (2014/15) average emergency admission rates decreased by 0.42% for the Pioneers and increased by 3.46% for the non-Pioneers, with a difference-in-differences of 3.89% (see Table 2). When the baseline was compared to the second follow-up period (2015/16), the Pioneers still had a lower increase at 2.23% but the difference compared to the non-Pioneers was smaller at 3.23%.

Table 2 Emergency admission rates for Pioneers and Non-Pioneers (adjusted for age, sex and deprivation decile) at baseline and follow-up, with percentage differences compared to baseline and difference-in-differences between non-Pioneers and Pioneers

|             | Emergency Admission Rate<br>(per 100,000 population) |         |         | Percentage Difference |         | Difference-in-Differences* |         |
|-------------|------------------------------------------------------|---------|---------|-----------------------|---------|----------------------------|---------|
|             | Baseline                                             | 2014/15 | 2015/16 | 2014/15               | 2015/16 | 2014/15                    | 2015/16 |
| Non-Pioneer | 9,942                                                | 10,287  | 10,485  | 3.46%                 | 5.46%   | 3.89%                      | 3.23%   |
| Pioneer     | 9,948                                                | 9,906   | 10,170  | -0.42%                | 2.23%   |                            |         |

\* *Difference between the non-Pioneer and Pioneer percentage differences, positive value indicates non-Pioneer change is greater*

Trends for the individual Pioneers varied. For example, half the Pioneers had a percentage increase in their emergency admission rates between baseline and 2014/15, while the percentage difference for the Pioneers as a whole was a slight decrease (see Table 3). There was also variation within Pioneers (see supplementary material). For example, the constituent local authorities comprising the Waltham Forest, East London and City Pioneer had declines in emergency admission rates ranging from -10.45% (Tower Hamlets) to -1.64% (Newham) between baseline and 2014/15, while the overall percentage difference was -5.73%.

Table 3 Emergency admission rates for individual Pioneers (adjusted for age, sex and deprivation decile) at baseline and follow-up, with percentage differences compared to baseline

| Pioneer (Number of LAs)                  | Emergency Admission Rate<br>(per 100,000 population) |         |         | Percentage Difference<br>to Baseline |         |
|------------------------------------------|------------------------------------------------------|---------|---------|--------------------------------------|---------|
|                                          | Baseline                                             | 2014/15 | 2015/16 | 2014/15                              | 2015/16 |
| Barnsley (1)                             | 10,992                                               | 11,769  | 12,325  | 7.07%                                | 12.13%  |
| Cheshire (2)                             | 11,259                                               | 12,160  | 12,459  | 8.00%                                | 10.65%  |
| Cornwall and Isles of Scilly (2)         | 8,170                                                | 8,061   | 8,193   | -1.33%                               | 0.29%   |
| Greenwich (1)                            | 8,168                                                | 8,226   | 9,513   | 0.71%                                | 16.47%  |
| Islington (1)                            | 6,324                                                | 6,320   | 6,096   | -0.06%                               | -3.60%  |
| Kent (12)                                | 9,349                                                | 10,033  | 10,009  | 7.32%                                | 7.06%   |
| Leeds (1)                                | 11,399                                               | 9,605   | 10,155  | -15.74%                              | -10.91% |
| North West London (8)                    | 8,922                                                | 8,665   | 8,812   | -2.87%                               | -1.23%  |
| South Devon and Torbay (3)               | 7,415                                                | 7,630   | 8,803   | 2.90%                                | 18.72%  |
| South Tyneside (1)                       | 11,153                                               | 10,445  | 11,150  | -6.35%                               | -0.03%  |
| Southend (1)                             | 9,243                                                | 10,397  | 10,224  | 12.49%                               | 10.61%  |
| Stoke and North Staffordshire (7)        | 9,949                                                | 10,253  | 10,611  | 3.06%                                | 6.66%   |
| Waltham Forest, East London and City (3) | 9,184                                                | 8,657   | 8,279   | -5.73%                               | -9.85%  |
| Worcestershire (6)                       | 9,018                                                | 8,817   | 9,006   | -2.23%                               | -0.13%  |

### Difference-in-Differences Regression

After adjusting for age, sex and deprivation, the difference-in-differences regression analysis showed that the change in emergency admission rates in the Pioneers between baseline and 2014/15 was smaller and significantly different from that of the non-Pioneers ( $p=0.0394$ ) (see Table 4). The Pioneer emergency admission rate increased by 1.98 per cent compared to 4.85 per cent in the non-Pioneers. When comparing baseline with 2015/16, the analysis still indicated that the change in emergency admissions for the Pioneers was smaller at 4.07 per cent compared to 6.36 percent for the non-Pioneers but the difference was not statistically significant ( $p=0.1905$ ).

Table 4 Difference in difference model coefficients and percentage difference in emergency admissions for Pioneers and Non-Pioneers, adjusted for age, sex and deprivation

|                                                        | 2014/15           | 2015/16           |
|--------------------------------------------------------|-------------------|-------------------|
| <b>Model Coefficients (p value)</b>                    |                   |                   |
| Intercept                                              | -5.4234 (<0.0001) | -5.4259 (<0.0001) |
| Non-Pioneer/Pioneer                                    | -0.0044 (0.8169)  | -0.0043 (0.8190)  |
| Baseline/Follow-Up                                     | 0.04173 (<0.0001) | 0.0617 (<0.0001)  |
| Interaction                                            | -0.0278 (0.0394)  | -0.0218 (0.1905)  |
| <b>Percentage Difference [95% confidence interval]</b> |                   |                   |
| Non-Pioneer                                            | 4.85 [3.68,6.03]  | 6.36 [5.05,7.70]  |
| Pioneer                                                | 1.98 [-0.37,4.38] | 4.07 [1.03,7.20]  |

### Sensitivity Analyses

Excluding Stoke and North Staffordshire did not affect the overall findings but reduced the significance of the difference between the Pioneers and non-Pioneers in 2014/15 ( $p=0.0489$ ), however, this exclusion also meant the trends were less parallel and subject to more bias from the baseline period ( $p=0.3130$ ). After comparing individual baseline years to 2014/15, all years found a smaller change for the non-Pioneers but only 2012/13 was statistically significant ( $p=0.0195$ ), this was also the baseline year with the most parallel trends for Pioneers and non-Pioneers ( $p=0.9235$ ). Full results presented in supplementary material.

### DISCUSSION

The Integrated Care and Support Pioneers represent one important example of how English health and social care services have been exploring new ways of working across organisational boundaries. The aims of the individual Pioneers varied,<sup>[3]</sup> but most had a common interest in

1  
2  
3 providing care and support that was intended to reduce the need for urgent care services and  
4 lead to a reduction in emergency hospital admissions. After comparing changes in emergency  
5 admissions from a three-year pre-Pioneer baseline period between Pioneer and non-Pioneer  
6 populations, we found a lower increase in emergency admissions for the Pioneers than the  
7 non-Pioneers. This lower increase was statistically significant for the comparison between  
8 baseline and 2014/15 ( $p=0.0394$ ) but not for the comparison between baseline and 2015/16  
9 ( $p=0.1905$ ).  
10  
11  
12  
13  
14  
15

16  
17 This type of population level analysis can help provide some independent evidence of the  
18 likely scale of changes within an area associated with integrated care initiatives and curb some  
19 of the more zealous rhetoric for or against integrated health and social care, and the related  
20 changes in service delivery. Looking at emergency admission data on this scale means the  
21 outcome of interest is based on a relatively large number of events and continuously collected  
22 data – making them useful as a measure of potential programme impact. This is in contrast  
23 to a range of other potential measures of health and social care integration at community  
24 level that are likely to be less sensitive to short term change such as annual patient experience  
25 surveys. The size and range of geographical areas covered by both the Pioneers and non-  
26 Pioneers along with their socio-demographic similarities should mean that differences in  
27 factors such as supply of social care services or acute hospital beds and the process of  
28 collecting data are unlikely to be systematically different between the two groups beyond any  
29 changes associated with Pioneer status.  
30  
31  
32  
33  
34  
35  
36  
37  
38  
39  
40

41  
42 It would be beneficial to track emergency admissions for more than two years to measure the  
43 impact of policy initiatives such as the Pioneers more definitively. However, during the life of  
44 the Pioneer programme, there were parallel changes in the wider policy context both in terms  
45 of specific health and care integration policies such as the Better Care Fund,[17] the overall  
46 level of funding for both health and social care in a period of unprecedented financial  
47 austerity and,[18] from 2015 onwards, the New Care Model Vanguard.[19] In particular, the  
48 Vanguard's approach to improving care coordination had much in common with the Pioneers.  
49 This means that the ideas behind integration that prompted the Pioneers and the types of  
50 interventions that they developed are no longer (if they ever were) unique to these areas and  
51 are being implemented across the country. Therefore, a true counter-factual population is  
52 difficult to find. This may, in part, explain why the difference between the Pioneers and non-  
53  
54  
55  
56  
57  
58  
59  
60



1  
2  
3 Pioneers reduced between baseline and 2015/16 compared with baseline and 2014/15 as the  
4 behaviour of the non-Pioneers becomes increasingly similar to the Pioneers.[20] This is in part  
5 to be expected as disseminating learning from the Pioneers was actively encouraged as part  
6 of the programme.  
7  
8  
9

10  
11 In addition to the difficulties of finding a counterfactual over the life-time of the Pioneers, it  
12 was not the first programme to focus on health and social care integration in England. One  
13 such previous initiative was the Integrated Care Pilots. While an effect on emergency  
14 admissions was not found for this programme, it can't be ruled out that these pilots have had  
15 a legacy impact on emergency admissions.[21] It should therefore be noted that, three of the  
16 Pioneers overlap with areas that were previously Integrated Care Pilots (Cornwall, Torbay and  
17 Tower Hamlets) and therefore, may have had a focus on integration for longer than some  
18 other Pioneers. This may in part explain the steady declines in emergency admissions seen in  
19 Tower Hamlets and to a lesser extent Cornwall. Seven of the Integrated Care Pilots also  
20 covered areas which were not Pioneers and therefore, the impact of the Pioneers in contrast  
21 to these may be reduced.  
22  
23  
24  
25  
26  
27  
28  
29  
30  
31

32  
33 A more detailed understanding of the impacts of the Pioneers would be gained with a  
34 targeted analytical approach using information on the specific initiatives implemented in each  
35 Pioneer and data on the exact populations in receipt of these initiatives (this is being  
36 attempted in another component of the Pioneer evaluation). While this might yield gains in  
37 terms of causal inference in that changes could potentially be attributed to a specific set of  
38 local actions, such an analysis might lose the ability to assess the impact of change across a  
39 system and an entire population. This is important to note as the Pioneers were intended to  
40 be a complex mix of specific service changes and initiatives, supported by a wider pattern of  
41 infrastructural changes at the level of the local health and social care system.  
42  
43  
44  
45  
46  
47  
48  
49

50  
51 Other studies have looked at schemes with an aspiration to reduce the need for urgent  
52 hospital care through better coordinated health and care services, and with an emphasis on  
53 preventing admissions. Success is typically assessed in terms of reduction in emergency  
54 hospital admissions and various previous evaluations show that this has been difficult to  
55 achieve.[9–11] Despite the intense policy interest in how different forms of service delivery  
56 can reduce emergency admissions, there are few, if any, studies showing unequivocal change  
57  
58  
59  
60



1  
2  
3 in the direction desired. Against this backdrop, the modest changes observed across the 14  
4 wave one Pioneer areas in their first two years look promising. However, when exploring the  
5 extent to which the observed changes are likely to be related causally to Pioneer status, it  
6 should be noted that:  
7  
8  
9

- 10  
11 a. the effect appears to be temporary: and as such the effect may have been linked  
12 to changes that took place in the early stages of the Pioneers or pre-Pioneer but  
13 were not sustained; or the non-Pioneer areas introduced changes which have  
14 subsequently reduced the difference between them and the Pioneers; and  
15  
16 b. the changes in emergency admissions were not shown in all places and even varied  
17 between local authority areas within the same Pioneer.  
18  
19  
20  
21  
22

### 23 **Conclusion**

24  
25 It is ambitious to expect unequivocal changes in a single high level and indirect indicator of  
26 health and care integration such as emergency hospital admissions to arise as a result of  
27 changes in local health and care provision across organisations brought about by the Pioneers  
28 in their early years. We should treat any signs that the Pioneers have had such an impact with  
29 caution. Nevertheless, our analysis does seem to provide some evidence that there were  
30 some changes in hospital use associated with the first year of Pioneer status that are worthy  
31 of further exploration. At the very least, this analysis shows that Pioneer status does not seem  
32 to have been associated with a relative deterioration in performance in terms of emergency  
33 hospital use.  
34  
35  
36  
37  
38  
39  
40  
41  
42

### 43 **FIGURE LEGEND**

44  
45 Figure 1 Emergency admission rate for Pioneers and Non-Pioneers by month adjusted for age,  
46 sex and deprivation decile (Pioneer intervention introduced in shaded area)  
47  
48  
49

### 50 **AUTHOR CONTRIBUTIONS**

51  
52 EK undertook the analysis and with MB drafted the initial paper. MB and NM contributed to  
53 design of the study. EK, MB, MAD, TH and NM contributed to interpretation of findings and  
54 revisions of the paper.  
55  
56  
57  
58  
59  
60

## ACKNOWLEDGEMENTS

This work uses data provided by patients and collected by the NHS as part of their care and support. Read more at <https://www.nuffieldtrust.org.uk/about/corporate-policies#information-security-and-data>.

Hospital Episode Statistics data (year range 2007/08–2015/16) Copyright © (2018), NHS Digital. Re-used with the permission of NHS Digital. All rights reserved.

## FUNDING

This study is funded by the NIHR Policy Research Programme (*Evaluation of the Integrated Care and Support Pioneers Programme in the context of new funding arrangements for integrated care in England (2015-2020)*, PR-R10-0514-25001). The views expressed are those of the authors and are not necessarily those of the NIHR or the Department of Health and Social Care.

## COMPETING INTERESTS

This study is funded by the NIHR Policy Research Programme (*Evaluation of the Integrated Care and Support Pioneers Programme in the context of new funding arrangements for integrated care in England (2015-2020)*, PR-R10-0514-25001). The views expressed are those of the authors and are not necessarily those of the NIHR or the Department of Health and Social Care.

## DATA AVAILABILITY

This study used Hospital Episode Statistics data obtained from NHS Digital under a data sharing agreement and are reused with their permission. Hospital Episode Statistics data may be obtained from NHS Digital under a similar process but we are unable to share it per the terms of our agreement.

**REFERENCES**

- [1] NHS England. Integrated care pioneers announced. 2013. Available: <https://www.england.nhs.uk/2013/11/interg-care-pioneers/>. [Accessed: 01-Aug-2018].
- [2] Department of Health. Letter inviting expressions of interest for health and social care integration “Pioneers”. 2013. Available: <https://www.gov.uk/government/publications/social-care-integration-pioneers>. [Accessed: 01-Aug-2018].
- [3] Erens B, Wistow G, Mounier-Jack S, et al. Early evaluation of Integrated Care and Support Pioneers Programme: Final Report. Policy Innovation Research Unit. 2015. Available: [http://piru.lshtm.ac.uk/assets/files/Early\\_evaluation\\_of\\_IC\\_Pioneers\\_Final\\_Report.pdf](http://piru.lshtm.ac.uk/assets/files/Early_evaluation_of_IC_Pioneers_Final_Report.pdf). [Accessed: 01-Aug-2018].
- [4] National Collaboration for Integrated Care and Support. Integrated Care and Support: Our Shared Commitment. 2013. Available: [https://assets.publishing.service.gov.uk/government/uploads/system/uploads/attachment\\_data/file/198748/DEFINITIVE\\_FINAL\\_VERSION\\_Integrated\\_Care\\_and\\_Support\\_-\\_Our\\_Shared\\_Commitment\\_2013-05-13.pdf](https://assets.publishing.service.gov.uk/government/uploads/system/uploads/attachment_data/file/198748/DEFINITIVE_FINAL_VERSION_Integrated_Care_and_Support_-_Our_Shared_Commitment_2013-05-13.pdf). [Accessed: 01-Aug-2018].
- [5] Raleigh V, Bardsley M, Smith P, et al. Integrated care and support Pioneers: Indicators for measuring the quality of integrated care: Final report. Policy Innovation Research Unit. 2014. Available: [http://piru.lshtm.ac.uk/assets/files/IC\\_and\\_support\\_Pioneers-Indicators.pdf](http://piru.lshtm.ac.uk/assets/files/IC_and_support_Pioneers-Indicators.pdf). [Accessed: 01-Aug-2018].
- [6] National Audit Office. Emergency admissions to hospital: managing the demand. National Audit Office. 2013. Available: <https://www.nao.org.uk/wp-content/uploads/2013/10/10288-001-Emergency-admissions.pdf>. [Accessed: 01-Aug-2018].
- [7] Wallace E, Smith SM, Fahey T, et al. Reducing emergency admissions through community based interventions. *BMJ* 2016;352:h6817 doi:10.1136/bmj.h6817 [published Online first: 28 January 2016].
- [8] Lloyd T, Wolters A, Steventon A. The impact of providing enhanced support for care home residents in Rushcliffe. The Health Foundation. 2017. Available: <https://www.health.org.uk/publication/impact-enhanced-support-rushcliffe>. [Accessed: 01-Aug-2018].

- 1  
2  
3 [9] Bardsley M, Steventon A, Smith J, et al. Evaluating integrated and community-based  
4 care: How do we know what works? The Nuffield Trust. 2013. Available:  
5 [https://www.nuffieldtrust.org.uk/files/2017-01/evaluating-integrated-community-](https://www.nuffieldtrust.org.uk/files/2017-01/evaluating-integrated-community-care-web-final.pdf)  
6 [care-web-final.pdf](https://www.nuffieldtrust.org.uk/files/2017-01/evaluating-integrated-community-care-web-final.pdf). [Accessed: 01-Aug-2018].  
7  
8  
9  
10 [10] Roland M, Lewis R, Steventon A, et al. Case management for at-risk elderly patients in  
11 the English integrated care pilots: observational study of staff and patient experience  
12 and secondary care utilisation. *Int J Integr Care* 2012;12(5)  
13 <http://doi.org/10.5334/ijic.850>.  
14  
15  
16 [11] Purdy S, Paranjothy S, Huntley A, et al. Interventions to reduce unplanned hospital  
17 admission: a series of systematic reviews. National Institute for Health Research. 2012.  
18 Available: [http://www.bristol.ac.uk/media-](http://www.bristol.ac.uk/media-library/sites/primaryhealthcare/migrated/documents/unplannedadmissions.pdf)  
19 [library/sites/primaryhealthcare/migrated/documents/unplannedadmissions.pdf](http://www.bristol.ac.uk/media-library/sites/primaryhealthcare/migrated/documents/unplannedadmissions.pdf).  
20 [Accessed: 01-Aug-2018].  
21  
22  
23 [12] NHS England. New Care Models: Vanguard – developing a blueprint for the future of  
24 the NHS and care services. 2016. Available: [https://www.england.nhs.uk/wp-](https://www.england.nhs.uk/wp-content/uploads/2015/11/new_care_models.pdf)  
25 [content/uploads/2015/11/new\\_care\\_models.pdf](https://www.england.nhs.uk/wp-content/uploads/2015/11/new_care_models.pdf) [Accessed: 11-Jun-2019]  
26  
27  
28 [13] NHS England. Breaking down barriers to better health and care. 2019. Available:  
29 [https://www.england.nhs.uk/wp-content/uploads/2019/04/breaking-down-barriers-](https://www.england.nhs.uk/wp-content/uploads/2019/04/breaking-down-barriers-to-better-health-and-care-march19.pdf)  
30 [to-better-health-and-care-march19.pdf](https://www.england.nhs.uk/wp-content/uploads/2019/04/breaking-down-barriers-to-better-health-and-care-march19.pdf) [Accessed: 11-Jun-2019]  
31  
32  
33 [14] NHS Digital. Hospital Episode Statistics data 2007/08-2015/16.  
34  
35  
36 [15] Office for National Statistics. Population estimates 2007-2015. Available:  
37 [https://www.ons.gov.uk/peoplepopulationandcommunity/populationandmigration/po-](https://www.ons.gov.uk/peoplepopulationandcommunity/populationandmigration/populationestimates)  
38 [pulationestimates](https://www.ons.gov.uk/peoplepopulationandcommunity/populationandmigration/populationestimates). [Accessed: 14-May-2018].  
39  
40  
41 [16] Ministry of Housing, Communities and Local Government. English indices of  
42 deprivation 2015. Available: [https://www.gov.uk/government/statistics/english-](https://www.gov.uk/government/statistics/english-indices-of-deprivation-2015)  
43 [indices-of-deprivation-2015](https://www.gov.uk/government/statistics/english-indices-of-deprivation-2015). [Accessed: 12-Jun-2018].  
44  
45  
46 [17] NHS England. Better Care Fund. Available: [https://www.england.nhs.uk/ourwork/part-](https://www.england.nhs.uk/ourwork/part-rel/transformation-fund/bcf-plan/)  
47 [rel/transformation-fund/bcf-plan/](https://www.england.nhs.uk/ourwork/part-rel/transformation-fund/bcf-plan/). [Accessed: 14-May-2018].  
48  
49  
50 [18] Robertson R, Wenzel L, Thompson J, et al. Understanding NHS financial pressures: How  
51 are they affecting patient care? The Kings Fund. 2017.  
52  
53  
54  
55  
56  
57  
58  
59  
60

- 1  
2  
3 [19] NHS. NHS Five Year Forward View. 2014. Available: [https://www.england.nhs.uk/wp-](https://www.england.nhs.uk/wp-content/uploads/2014/10/5yfv-web.pdf)  
4 content/uploads/2014/10/5yfv-web.pdf. [Accessed: 01-Aug-2018].  
5  
6  
7 [20] Chen YF, Hemming K, Stevens AJ, et al. Secular trends and evaluation of complex  
8 interventions: the rising tide phenomenon. *BMJ Qual Saf* 2016;25(5)303–310 doi:  
9 10.1136/bmjqs-2015-004372 [published Online first: 06 Oct 2015].  
10  
11  
12 [21] RAND Europe and Ernst & Young LLP. National Evaluation of the Department of Health's  
13 Integrated Care Pilots: Final Report. 2012. Available:  
14 [https://assets.publishing.service.gov.uk/government/uploads/system/uploads/attach](https://assets.publishing.service.gov.uk/government/uploads/system/uploads/attachment_data/file/215103/dh_133127.pdf)  
15 ment\_data/file/215103/dh\_133127.pdf [Accessed: 14-Jun-2019]  
16  
17  
18  
19  
20  
21  
22  
23  
24  
25  
26  
27  
28  
29  
30  
31  
32  
33  
34  
35  
36  
37  
38  
39  
40  
41  
42  
43  
44  
45  
46  
47  
48  
49  
50  
51  
52  
53  
54  
55  
56  
57  
58  
59  
60



**SUPPLEMENTARY MATERIAL**

1. Target populations, integration mechanisms, activities and emergency admission focus of Wave 1 Pioneers
2. Local Authority to Pioneer Lookup
3. Emergency admission rates for individual local authorities within Pioneers
4. Sensitivity analysis: excluding Stoke and North Staffordshire Pioneer
5. Sensitivity analysis: individual baseline years compared to 2014/15

For peer review only

### 1. Target populations, integration mechanisms, activities and emergency admission focus of Wave 1 Pioneers

| Pioneer                      | Target Population(s)                                                                                | Integration Mechanisms                                                                                                                                                                                                                                                                                                         | Examples of Specific Activities                                                                                                                                                                                                       | Reduced emergency admissions |
|------------------------------|-----------------------------------------------------------------------------------------------------|--------------------------------------------------------------------------------------------------------------------------------------------------------------------------------------------------------------------------------------------------------------------------------------------------------------------------------|---------------------------------------------------------------------------------------------------------------------------------------------------------------------------------------------------------------------------------------|------------------------------|
| Barnsley                     | Whole population with focus on children and families                                                | Integrated programme boards; Adopting a citizenship approach at all levels of the community to move from intervention to prevention; Provision of information, advice, and signposting through services such as telecare.                                                                                                      | Universal information and advice service; Be Well Barnsley: community orientated prevention; Immediate care review; Integrated personal budgets                                                                                       | Aim                          |
| Cheshire                     | Older adults with chronic conditions; individuals with mental health issues; complex needs families | Integration commissioning through a joint governance board, redesigned care and intervention pathways and joint investment plan involving the voluntary and community sectors; Integration of care management and investment into integration enablers, such as shared records and telehealth services.                        | New funding/contracting model for the acute sector and community care; Hospital at home; Partnership working between Health Care Management Financial Association, Health Care Services and Net Orange to reduce hospital admissions; | Outcome                      |
| Cornwall and Isles of Scilly | People who are at risk of becoming high users of health and social care services                    | Integrated leadership through shared goals and performance measures, information sharing and a new funding contract; Investment in telehealth; Integrated care through multi-disciplinary teams, workforce development, information sharing; Better prevention through early risk identification and management of acute care. | Personal health budgets; Specific acute activities: <ul style="list-style-type: none"> <li>- Rapid assessment upon presentation to acute care</li> <li>- Discharge support</li> <li>- Visual ward model</li> </ul>                    | Outcome                      |



|           |                                                                                                                                                   |                                                                                                                                                                                                                                                                                                                                |                                                                                                                                                                                                                                                                                                                                                                                                                                                                                                                        |         |
|-----------|---------------------------------------------------------------------------------------------------------------------------------------------------|--------------------------------------------------------------------------------------------------------------------------------------------------------------------------------------------------------------------------------------------------------------------------------------------------------------------------------|------------------------------------------------------------------------------------------------------------------------------------------------------------------------------------------------------------------------------------------------------------------------------------------------------------------------------------------------------------------------------------------------------------------------------------------------------------------------------------------------------------------------|---------|
| Greenwich | Older people with complex or chronic conditions; individuals with mental health issues                                                            | Integrated commissioning through joint health and social care assessment, planning and management; Integrated care through multi-disciplinary teams including the voluntary sector, shared care plans, information and investment in self-care initiatives such as telehealth; Better prevention and management of acute care. | Personal health budgets; Specific acute activities: <ul style="list-style-type: none"> <li>- Risk stratification to identify 11.5% at highest risk of hospital admission within one year</li> <li>- Virtual admission avoidance team</li> <li>- Greenwich Joint Emergency Team (JET)</li> <li>- Access to the medical diagnostic centre at the acute trust and outreach specialist opinion</li> <li>- Hospital Intervention Discharge Team</li> <li>- Community Assessment and Rehabilitation Teams (CARs).</li> </ul> | Outcome |
| Islington | Whole population with focus on vulnerable older people; people with long term conditions; young people at risk; people with mental health issues. | Integrated commissioning including patients through shared vision, planning, and information sharing; Integrated care activities including information sharing; Better prevention activities, including self-management support through personal health budgets and telehealth.                                                | Incentivising acute and community healthcare services through CQUIN<br>Care pathways for conditions like COPD.                                                                                                                                                                                                                                                                                                                                                                                                         | Aim     |
| Kent      | Adults with long term conditions and older people                                                                                                 | Integrated commissioning through information sharing and data mapping; Integrated care through multidisciplinary care teams organised around GP practices and workforce development; Better prevention through risk identification, and self-management activities such as personal health budgets and telehealth.             | Year of Care financial model and risk stratification; Multidisciplinary care team meetings and neighbourhood care teams, integrated working within A&E departments, community integrated care centres; Advanced Assistive technology partnership, joint working between paramedics and social care practitioners to respond quickly to 999 calls.                                                                                                                                                                      | Aim     |

|                        |                                                   |                                                                                                                                                                                                                                                                              |                                                                                                                                                                                                                                                                           |         |
|------------------------|---------------------------------------------------|------------------------------------------------------------------------------------------------------------------------------------------------------------------------------------------------------------------------------------------------------------------------------|---------------------------------------------------------------------------------------------------------------------------------------------------------------------------------------------------------------------------------------------------------------------------|---------|
| Leeds                  | Whole population                                  | Integrated commissioning with shared vision, outcomes and budget;<br>Integrated care through health and social care teams focused around GP practice populations and workforce development;<br>Prevention through self-management activities such as telehealth.             | Risk stratification and year of care model;<br>Divestment from emergency department; funding where appropriate to reinvest into community-based services;<br>Fully integrated health and social care bed unit                                                             | Outcome |
| North West London      | Whole population                                  | Integrated commissioning with a shared vision, responsibility, budget allocation and information sharing;<br>Integrated care through joined up services, incentives, multidisciplinary care teams and care plans;<br>Prevention and self-management through personalisation. | Integrated care organisation;<br>Bespoke IT tool to access patient data for both patients and care providers to help prevent readmission.                                                                                                                                 | Aim     |
| Southend               | Whole population with focus on high service users | Integrated commissioning through a Pioneer Strategic Group, with a shared budget and information management;<br>Integrated care through increased involvement of the voluntary sector and patients in co-design and workforce development.                                   | 7-day multidisciplinary teams;<br>Extension of the Single Point of Referral (SPOR) to reduce avoidable admissions and delayed transfers of care;<br>Hospital discharge-step down scheme.                                                                                  | Outcome |
| South Devon and Torbay | Whole population                                  | Integrated commissioning and governance arrangements with shared objectives, information sharing and bringing together leaders in the health and social care system;                                                                                                         | Support for a 24/7 hospice at home service through a chosen care home provider, with a team of specialist nurses and senior healthcare assistants, a rapid response service and night driver team;<br>Pilot of Sunday working over three consecutive weekends on 5 wards; | Outcome |

|                                      |                                                                                                                          |                                                                                                                                                                                                                                                                                                                                                                             |                                                                                                                                                                  |         |
|--------------------------------------|--------------------------------------------------------------------------------------------------------------------------|-----------------------------------------------------------------------------------------------------------------------------------------------------------------------------------------------------------------------------------------------------------------------------------------------------------------------------------------------------------------------------|------------------------------------------------------------------------------------------------------------------------------------------------------------------|---------|
|                                      |                                                                                                                          | Integrated care, not as an objective but an enabler, including an integrated care organisation providing acute, community and social care services 7 days a week, multidisciplinary teams including involvement of voluntary sector and workforce development;<br>Two programmes of work focused on better management of care and support for the elderly and young people. | Joined up IT including E-prescribing, E-booking and VitalPAC across healthcare organisations.                                                                    |         |
| South Tyneside                       | Whole population with focus on people who could benefit from initiatives on prevention, wellness promotion and self-care | Integrated commissioning and provision of care, through shared funding, joint decision-making, workforce development and information sharing.                                                                                                                                                                                                                               | Urgent care delivery group.<br>Predictive modelling to identify groups of patients vulnerable to hospital admission.                                             | Aim     |
| Stoke and North Staffordshire        | Cancer and end-of-life care patients                                                                                     | Integrated service development through co-design by CCGs, Macmillan Cancer Support, Local Authorities and Public Health England to create accountable Service Integrator;<br>Integrated commissioning through shared arrangements across CCGs and social care and outcomes;<br>Integrated care through workforce development and co-design of care pathways.                | Appointment of a principal provider for cancer and a principal provider for end of life care accountable for the determination of patient pathways through care. | -       |
| Waltham Forest, East London and City | People at risk of hospital admission                                                                                     | Integrated commissioning through data sharing, joint                                                                                                                                                                                                                                                                                                                        | Whole System Demonstrator pilot.<br>Waltham Forest case management and rapid response programme.                                                                 | Outcome |

1  
2  
3  
4  
5  
6  
7  
8  
9  
10  
11  
12  
13  
14  
15  
16  
17  
18  
19  
20  
21  
22  
23  
24  
25  
26  
27  
28  
29  
30  
31  
32  
33  
34  
35  
36  
37  
38  
39  
40  
41  
42  
43  
44  
45  
46

|                |                                                                                  |                                                                                                                                                                                                                                                                                                                                                                                                                                                                                         |                                                                                                                                                                       |         |
|----------------|----------------------------------------------------------------------------------|-----------------------------------------------------------------------------------------------------------------------------------------------------------------------------------------------------------------------------------------------------------------------------------------------------------------------------------------------------------------------------------------------------------------------------------------------------------------------------------------|-----------------------------------------------------------------------------------------------------------------------------------------------------------------------|---------|
|                |                                                                                  | health/social care assessment, joint contracting and payment; Integrated care through workforce development, restructuring of secondary care providers, greater involvement of the voluntary sector, rapid response and discharge tools, acute discharge support.                                                                                                                                                                                                                       |                                                                                                                                                                       |         |
| Worcestershire | Whole population with focus on older people and people with long term conditions | Integrated commissioning through a shared funding of the oversight board, a shared vision, and community engagement.<br>Integrated care through service and clinical integration over organisational integration, reorganised acute care, multidisciplinary teams with involvement of the voluntary sector.<br>6 Transformation programme areas: Urgent Care; Out of hospital care; Specialised Commissioning; Acute Hospital Services; Future Lives; Children and Young People’s Plan. | Virtual ward and integrated team projects.<br>Assistive technology for self-care and self-monitoring.<br>Improving Patient Flow strategy.<br>Personal Health Budgets. | Outcome |

## 2. Local Authority to Pioneer Lookup

| Local Authority Code | Local Authority           | Pioneer                                 |
|----------------------|---------------------------|-----------------------------------------|
| E0800016             | Barnsley                  | Barnsley                                |
| E06000050            | Cheshire West and Chester | Cheshire                                |
| E06000049            | Cheshire East             | Cheshire                                |
| E06000052            | Cornwall                  | Cornwall and Isles of Scilly            |
| E06000053            | Isles of Scilly           | Cornwall and Isles of Scilly            |
| E09000011            | Greenwich                 | Greenwich                               |
| E09000019            | Islington                 | Islington                               |
| E07000105            | Ashford                   | Kent                                    |
| E07000106            | Canterbury                | Kent                                    |
| E07000107            | Dartford                  | Kent                                    |
| E07000108            | Dover                     | Kent                                    |
| E07000109            | Gravesham                 | Kent                                    |
| E07000110            | Maidstone                 | Kent                                    |
| E07000111            | Sevenoaks                 | Kent                                    |
| E07000112            | Shepway                   | Kent                                    |
| E07000113            | Swale                     | Kent                                    |
| E07000114            | Thanet                    | Kent                                    |
| E07000115            | Tonbridge and Malling     | Kent                                    |
| E07000116            | Tunbridge Wells           | Kent                                    |
| E08000035            | Leeds                     | Leeds                                   |
| E09000005            | Brent                     | North West London                       |
| E09000009            | Ealing                    | North West London                       |
| E09000013            | Hammersmith and Fulham    | North West London                       |
| E09000015            | Harrow                    | North West London                       |
| E09000017            | Hillingdon                | North West London                       |
| E09000018            | Hounslow                  | North West London                       |
| E09000020            | Kensington and Chelsea    | North West London                       |
| E09000033            | Westminster               | North West London                       |
| E06000027            | Torbay                    | South Devon and Torbay                  |
| E07000044            | South Hams                | South Devon and Torbay                  |
| E07000045            | Teignbridge               | South Devon and Torbay                  |
| E08000023            | South Tyneside            | South Tyneside                          |
| E06000033            | Southend-on-Sea           | Southend                                |
| E07000192            | Cannock Chase             | Stoke and North Staffordshire           |
| E07000194            | Lichfield                 | Stoke and North Staffordshire           |
| E07000195            | Newcastle-under-Lyme      | Stoke and North Staffordshire           |
| E07000197            | Stafford                  | Stoke and North Staffordshire           |
| E07000198            | Staffordshire Moorlands   | Stoke and North Staffordshire           |
| E06000021            | Stoke-on-Trent            | Stoke and North Staffordshire           |
| E07000196            | South Staffordshire       | Stoke and North Staffordshire           |
| E09000031            | Waltham Forest            | Waltham Forest and East London and City |
| E09000025            | Newham                    | Waltham Forest and East London and City |
| E09000030            | Tower Hamlets             | Waltham Forest and East London and City |
| E07000234            | Bromsgrove                | Worcestershire                          |

1  
2  
3  
4  
5  
6  
7  
8  
9  
10  
11  
12  
13  
14  
15  
16  
17  
18  
19  
20  
21  
22  
23  
24  
25  
26  
27  
28  
29  
30  
31  
32  
33  
34  
35  
36  
37  
38  
39  
40  
41  
42  
43  
44  
45  
46  
47  
48  
49  
50  
51  
52  
53  
54  
55  
56  
57  
58  
59  
60

|           |               |                |
|-----------|---------------|----------------|
| E07000235 | Malvern Hills | Worcestershire |
| E07000236 | Redditch      | Worcestershire |
| E07000237 | Worcester     | Worcestershire |
| E07000238 | Wychavon      | Worcestershire |
| E07000239 | Wyre Forest   | Worcestershire |

For peer review only

### 3. Emergency admission rates for individual local authorities within Pioneers at baseline and follow up, with percentage differences compared to baseline

| Local Authority Code | Local Authority              | Emergency Admission Rate |         |         | Percentage Difference |         |
|----------------------|------------------------------|--------------------------|---------|---------|-----------------------|---------|
|                      |                              | Baseline                 | 2014/15 | 2015/16 | 2014/15               | 2015/16 |
| E08000016            | Barnsley                     | 10,992                   | 11,769  | 12,325  | 7.07%                 | 12.13%  |
| E06000049            | Cheshire East                | 11,485                   | 12,537  | 12,954  | 9.17%                 | 12.80%  |
| E06000050            | Cheshire West and Chester    | 11,033                   | 11,782  | 11,963  | 6.79%                 | 8.42%   |
| E06000052/53         | Cornwall and Isles of Scilly | 8,170                    | 8,061   | 8,193   | -1.33%                | 0.29%   |
| E09000011            | Greenwich                    | 8,168                    | 8,226   | 9,513   | 0.71%                 | 16.47%  |
| E09000019            | Islington                    | 6,324                    | 6,320   | 6,096   | -0.06%                | -3.60%  |
| E07000105            | Ashford                      | 8,708                    | 9,785   | 10,506  | 12.37%                | 20.65%  |
| E07000106            | Canterbury                   | 9,663                    | 10,503  | 10,499  | 8.70%                 | 8.66%   |
| E07000107            | Dartford                     | 10,325                   | 12,037  | 11,063  | 16.59%                | 7.15%   |
| E07000108            | Dover                        | 9,201                    | 10,411  | 10,809  | 13.14%                | 17.47%  |
| E07000109            | Gravesham                    | 9,529                    | 10,825  | 10,379  | 13.60%                | 8.92%   |
| E07000110            | Maidstone                    | 9,553                    | 10,470  | 10,219  | 9.60%                 | 6.97%   |
| E07000111            | Sevenoaks                    | 8,420                    | 8,842   | 8,114   | 5.01%                 | -3.64%  |
| E07000112            | Shepway                      | 8,921                    | 9,566   | 10,274  | 7.24%                 | 15.17%  |
| E07000113            | Swale                        | 10,590                   | 10,746  | 12,117  | 1.47%                 | 14.42%  |
| E07000114            | Thanet                       | 9,245                    | 9,952   | 10,194  | 7.65%                 | 10.27%  |
| E07000115            | Tonbridge and Malling        | 8,842                    | 8,632   | 8,448   | -2.37%                | -4.46%  |
| E07000116            | Tunbridge Wells              | 9,188                    | 8,631   | 7,483   | -6.06%                | -18.55% |
| E08000035            | Leeds                        | 11,399                   | 9,605   | 10,155  | -15.74%               | -10.91% |
| E09000005            | Brent                        | 8,882                    | 8,541   | 8,425   | -3.84%                | -5.15%  |
| E09000009            | Ealing                       | 10,246                   | 9,828   | 10,398  | -4.08%                | 1.49%   |
| E09000013            | Hammersmith and Fulham       | 10,312                   | 9,588   | 9,876   | -7.03%                | -4.23%  |
| E09000015            | Harrow                       | 8,397                    | 8,430   | 8,084   | 0.39%                 | -3.73%  |
| E09000017            | Hillingdon                   | 9,753                    | 9,636   | 9,346   | -1.20%                | -4.18%  |
| E09000018            | Hounslow                     | 8,998                    | 9,751   | 11,053  | 8.36%                 | 22.83%  |
| E09000020            | Kensington and Chelsea       | 7,688                    | 7,094   | 7,048   | -7.73%                | -8.32%  |
| E09000033            | Westminster                  | 7,095                    | 6,454   | 6,266   | -9.04%                | -11.70% |
| E07000044            | South Hams                   | 6,591                    | 6,413   | 6,962   | -2.69%                | 5.63%   |
| E07000045            | Teignbridge                  | 7,657                    | 8,182   | 9,275   | 6.86%                 | 21.13%  |
| E06000027            | Torbay                       | 7,998                    | 8,296   | 10,173  | 3.72%                 | 27.19%  |
| E08000023            | South Tyneside               | 11,153                   | 10,445  | 11,150  | -6.35%                | -0.03%  |
| E06000033            | Southend-on-Sea              | 9,243                    | 10,397  | 10,224  | 12.49%                | 10.61%  |
| E07000192            | Cannock Chase                | 10,438                   | 10,611  | 10,083  | 1.66%                 | -3.40%  |
| E07000194            | Lichfield                    | 8,754                    | 9,424   | 9,971   | 7.65%                 | 13.90%  |
| E07000195            | Newcastle-under-Lyme         | 11,919                   | 12,034  | 12,625  | 0.96%                 | 5.92%   |
| E07000196            | South Staffordshire          | 8,353                    | 8,907   | 9,575   | 6.64%                 | 14.63%  |
| E07000197            | Stafford                     | 10,289                   | 10,441  | 9,900   | 1.47%                 | -3.78%  |
| E07000198            | Staffordshire Moorlands      | 8,448                    | 8,649   | 9,162   | 2.37%                 | 8.45%   |
| E06000021            | Stoke-on-Trent               | 11,438                   | 11,704  | 12,959  | 2.32%                 | 13.29%  |

|           |                |        |        |        |         |         |
|-----------|----------------|--------|--------|--------|---------|---------|
| E09000025 | Newham         | 7,897  | 7,535  | 7,802  | -4.58%  | -1.20%  |
| E09000030 | Tower Hamlets  | 10,166 | 9,103  | 8,795  | -10.45% | -13.49% |
| E09000031 | Waltham Forest | 9,489  | 9,333  | 8,242  | -1.64%  | -13.14% |
| E07000234 | Bromsgrove     | 8,452  | 9,292  | 9,165  | 9.94%   | 8.43%   |
| E07000235 | Malvern Hills  | 8,289  | 7,937  | 7,360  | -4.25%  | -11.21% |
| E07000236 | Redditch       | 10,556 | 10,650 | 11,534 | 0.89%   | 9.26%   |
| E07000237 | Worcester      | 9,858  | 9,180  | 9,705  | -6.88%  | -1.56%  |
| E07000238 | Wychavon       | 9,094  | 8,475  | 8,760  | -6.81%  | -3.68%  |
| E07000239 | Wyre Forest    | 7,855  | 7,366  | 7,511  | -6.23%  | -4.38%  |

#### 4. Sensitivity analysis: excluding Stoke and North Staffordshire Pioneer

|                                                        | 2014/15           | 2015/16           |
|--------------------------------------------------------|-------------------|-------------------|
| <b>Model Coefficients (p value)</b>                    |                   |                   |
| Intercept                                              | -5.4279 (<0.0001) | -5.4297 (<0.0001) |
| Non-Pioneer/Pioneer                                    | -0.0205 (0.3009)  | -0.0204 (0.3023)  |
| Baseline/Follow-Up                                     | 0.0487 (<0.0001)  | 0.0634 (<0.0001)  |
| Interaction                                            | -0.0302 (0.0489)  | -0.0254 (0.1717)  |
| <b>Percentage Difference [95% confidence interval]</b> |                   |                   |
| Non-Pioneer                                            | 4.99 [3.81,6.18]  | 6.54 [5.21,7.89]  |
| Pioneer                                                | 1.86 [-0.85,4.65] | 3.87 [0.43,7.42]  |

Parallel trends interaction term p value = 0.3130

#### 5. Sensitivity analysis: individual baseline years compared to 2014/15

| Baseline Year                                          | 2010/11           | 2011/12           | 2012/13           |
|--------------------------------------------------------|-------------------|-------------------|-------------------|
| <b>Parallel Trends P Value</b>                         | 0.8272            | 0.3425            | 0.9235            |
| <b>Model Coefficients (p value)</b>                    |                   |                   |                   |
| Intercept                                              | -5.4173 (<0.0001) | -5.4524 (<0.0001) | -5.4144 (<0.0001) |
| Non-Pioneer/Pioneer                                    | -0.0027 (0.9005)  | -0.0034 (0.8652)  | -0.0058 (0.7514)  |
| Baseline/Time 2                                        | 0.0517 (<0.0001)  | 0.0522 (<0.0001)  | 0.0698 (<0.00001) |
| Interaction                                            | -0.0290 (0.0916)  | -0.0285 (0.0730)  | -0.0258 (0.0195)  |
| <b>Percentage Difference [95% confidence interval]</b> |                   |                   |                   |
| Non-Pioneer                                            | 5.30 [3.93,6.70]  | 5.36 [4.09,6.63]  | 7.23 [6.07,8.40]  |
| Pioneer                                                | 2.29 [-0.95,5.64] | 2.40 [0.46,5.34]  | 4.50 [2.48,6.55]  |



## STROBE Statement—checklist of items that should be included in reports of observational studies

|                              | Item No | Recommendation                                                                                                                                                                                                                                                                                                                                                                                                                                                         | Page No |
|------------------------------|---------|------------------------------------------------------------------------------------------------------------------------------------------------------------------------------------------------------------------------------------------------------------------------------------------------------------------------------------------------------------------------------------------------------------------------------------------------------------------------|---------|
| <b>Title and abstract</b>    | 1       | (a) Indicate the study's design with a commonly used term in the title or the abstract                                                                                                                                                                                                                                                                                                                                                                                 | 1       |
|                              |         | (b) Provide in the abstract an informative and balanced summary of what was done and what was found                                                                                                                                                                                                                                                                                                                                                                    | 2-3     |
| <b>Introduction</b>          |         |                                                                                                                                                                                                                                                                                                                                                                                                                                                                        |         |
| Background/rationale         | 2       | Explain the scientific background and rationale for the investigation being reported                                                                                                                                                                                                                                                                                                                                                                                   | 4-5     |
| Objectives                   | 3       | State specific objectives, including any prespecified hypotheses                                                                                                                                                                                                                                                                                                                                                                                                       | 5       |
| <b>Methods</b>               |         |                                                                                                                                                                                                                                                                                                                                                                                                                                                                        |         |
| Study design                 | 4       | Present key elements of study design early in the paper                                                                                                                                                                                                                                                                                                                                                                                                                | 6       |
| Setting                      | 5       | Describe the setting, locations, and relevant dates, including periods of recruitment, exposure, follow-up, and data collection                                                                                                                                                                                                                                                                                                                                        | 6-7     |
| Participants                 | 6       | (a) <i>Cohort study</i> —Give the eligibility criteria, and the sources and methods of selection of participants. Describe methods of follow-up<br><i>Case-control study</i> —Give the eligibility criteria, and the sources and methods of case ascertainment and control selection. Give the rationale for the choice of cases and controls<br><i>Cross-sectional study</i> —Give the eligibility criteria, and the sources and methods of selection of participants | 6-7     |
|                              |         | (b) <i>Cohort study</i> —For matched studies, give matching criteria and number of exposed and unexposed<br><i>Case-control study</i> —For matched studies, give matching criteria and the number of controls per case                                                                                                                                                                                                                                                 | -       |
| Variables                    | 7       | Clearly define all outcomes, exposures, predictors, potential confounders, and effect modifiers. Give diagnostic criteria, if applicable                                                                                                                                                                                                                                                                                                                               | 6-7     |
| Data sources/<br>measurement | 8*      | For each variable of interest, give sources of data and details of methods of assessment (measurement). Describe comparability of assessment methods if there is more than one group                                                                                                                                                                                                                                                                                   | 6-7     |
| Bias                         | 9       | Describe any efforts to address potential sources of bias                                                                                                                                                                                                                                                                                                                                                                                                              | 8       |
| Study size                   | 10      | Explain how the study size was arrived at                                                                                                                                                                                                                                                                                                                                                                                                                              | -       |
| Quantitative variables       | 11      | Explain how quantitative variables were handled in the analyses. If applicable, describe which groupings were chosen and why                                                                                                                                                                                                                                                                                                                                           | 7-8     |
| Statistical methods          | 12      | (a) Describe all statistical methods, including those used to control for confounding                                                                                                                                                                                                                                                                                                                                                                                  | 7-8     |
|                              |         | (b) Describe any methods used to examine subgroups and interactions                                                                                                                                                                                                                                                                                                                                                                                                    | -       |
|                              |         | (c) Explain how missing data were addressed                                                                                                                                                                                                                                                                                                                                                                                                                            | -       |
|                              |         | (d) <i>Cohort study</i> —If applicable, explain how loss to follow-up was addressed<br><i>Case-control study</i> —If applicable, explain how matching of cases and controls was addressed<br><i>Cross-sectional study</i> —If applicable, describe analytical methods taking account of sampling strategy                                                                                                                                                              | -       |
|                              |         | (e) Describe any sensitivity analyses                                                                                                                                                                                                                                                                                                                                                                                                                                  | 8       |

Continued on next page

1  
2  
3  
4  
5  
6  
7  
8  
9  
10  
11  
12  
13  
14  
15  
16  
17  
18  
19  
20  
21  
22  
23  
24  
25  
26  
27  
28  
29  
30  
31  
32  
33  
34  
35  
36  
37  
38  
39  
40  
41  
42  
43  
44  
45  
46  
47  
48  
49  
50  
51  
52  
53  
54  
55  
56  
57  
58  
59  
60**Results**

|                  |     |                                                                                                                                                                                                              |      |
|------------------|-----|--------------------------------------------------------------------------------------------------------------------------------------------------------------------------------------------------------------|------|
| Participants     | 13* | (a) Report numbers of individuals at each stage of study—eg numbers potentially eligible, examined for eligibility, confirmed eligible, included in the study, completing follow-up, and analysed            | 9    |
|                  |     | (b) Give reasons for non-participation at each stage                                                                                                                                                         | -    |
|                  |     | (c) Consider use of a flow diagram                                                                                                                                                                           | -    |
| Descriptive data | 14* | (a) Give characteristics of study participants (eg demographic, clinical, social) and information on exposures and potential confounders                                                                     | 9    |
|                  |     | (b) Indicate number of participants with missing data for each variable of interest                                                                                                                          | -    |
|                  |     | (c) <i>Cohort study</i> —Summarise follow-up time (eg, average and total amount)                                                                                                                             | -    |
| Outcome data     | 15* | <i>Cohort study</i> —Report numbers of outcome events or summary measures over time                                                                                                                          | -    |
|                  |     | <i>Case-control study</i> —Report numbers in each exposure category, or summary measures of exposure                                                                                                         | -    |
|                  |     | <i>Cross-sectional study</i> —Report numbers of outcome events or summary measures                                                                                                                           | 9-10 |
| Main results     | 16  | (a) Give unadjusted estimates and, if applicable, confounder-adjusted estimates and their precision (eg, 95% confidence interval). Make clear which confounders were adjusted for and why they were included | 9-11 |
|                  |     | (b) Report category boundaries when continuous variables were categorized                                                                                                                                    | -    |
|                  |     | (c) If relevant, consider translating estimates of relative risk into absolute risk for a meaningful time period                                                                                             | -    |
| Other analyses   | 17  | Report other analyses done—eg analyses of subgroups and interactions, and sensitivity analyses                                                                                                               | -    |

**Discussion**

|                  |    |                                                                                                                                                                            |       |
|------------------|----|----------------------------------------------------------------------------------------------------------------------------------------------------------------------------|-------|
| Key results      | 18 | Summarise key results with reference to study objectives                                                                                                                   | 11    |
| Limitations      | 19 | Discuss limitations of the study, taking into account sources of potential bias or imprecision. Discuss both direction and magnitude of any potential bias                 | 12-13 |
| Interpretation   | 20 | Give a cautious overall interpretation of results considering objectives, limitations, multiplicity of analyses, results from similar studies, and other relevant evidence | 12-13 |
| Generalisability | 21 | Discuss the generalisability (external validity) of the study results                                                                                                      | 12-14 |

**Other information**

|         |    |                                                                                                                                                               |    |
|---------|----|---------------------------------------------------------------------------------------------------------------------------------------------------------------|----|
| Funding | 22 | Give the source of funding and the role of the funders for the present study and, if applicable, for the original study on which the present article is based | 15 |
|---------|----|---------------------------------------------------------------------------------------------------------------------------------------------------------------|----|

\*Give information separately for cases and controls in case-control studies and, if applicable, for exposed and unexposed groups in cohort and cross-sectional studies.

**Note:** An Explanation and Elaboration article discusses each checklist item and gives methodological background and published examples of transparent reporting. The STROBE checklist is best used in conjunction with this article (freely available on the Web sites of PLoS Medicine at <http://www.plosmedicine.org/>, Annals of Internal Medicine at <http://www.annals.org/>, and Epidemiology at <http://www.epidem.com/>). Information on the STROBE Initiative is available at [www.strobe-statement.org](http://www.strobe-statement.org).
