# Supplementary material for: Area level impacts on emergency hospital admissions of the integrated care and support pioneer programme in England: difference-in-differences analysis
Source: PubMed Central journal article supplement (PMC6701574; doi:10.1136/bmjopen-2018-026509), 2019-08-18
Supplement: bmjopen-2018-026509supp001.pdf [file bmjopen-2018-026509supp001.pdf]

**SUPPLEMENTARY MATERIAL**

1. Target populations, integration mechanisms, activities and emergency admission focus of Wave 1 Pioneers
2. Local Authority to Pioneer Lookup
3. Emergency admission rates for individual local authorities within Pioneers
4. Sensitivity analysis: excluding Stoke and North Staffordshire Pioneer
5. Sensitivity analysis: individual baseline years compared to 2014/15

### 1. Target populations, integration mechanisms, activities and emergency admission focus of Wave 1 Pioneers

| Pioneer                      | Target Population(s)                                                                                | Integration Mechanisms                                                                                                                                                                                                                                                                                                         | Examples of Specific Activities                                                                                                                                                                                                       | Reduced emergency admissions |
|------------------------------|-----------------------------------------------------------------------------------------------------|--------------------------------------------------------------------------------------------------------------------------------------------------------------------------------------------------------------------------------------------------------------------------------------------------------------------------------|---------------------------------------------------------------------------------------------------------------------------------------------------------------------------------------------------------------------------------------|------------------------------|
| Barnsley                     | Whole population with focus on children and families                                                | Integrated programme boards; Adopting a citizenship approach at all levels of the community to move from intervention to prevention; Provision of information, advice, and signposting through services such as telecare.                                                                                                      | Universal information and advice service; Be Well Barnsley: community orientated prevention; Immediate care review; Integrated personal budgets                                                                                       | Aim                          |
| Cheshire                     | Older adults with chronic conditions; individuals with mental health issues; complex needs families | Integration commissioning through a joint governance board, redesigned care and intervention pathways and joint investment plan involving the voluntary and community sectors; Integration of care management and investment into integration enablers, such as shared records and telehealth services.                        | New funding/contracting model for the acute sector and community care; Hospital at home; Partnership working between Health Care Management Financial Association, Health Care Services and Net Orange to reduce hospital admissions; | Outcome                      |
| Cornwall and Isles of Scilly | People who are at risk of becoming high users of health and social care services                    | Integrated leadership through shared goals and performance measures, information sharing and a new funding contract; Investment in telehealth; Integrated care through multi-disciplinary teams, workforce development, information sharing; Better prevention through early risk identification and management of acute care. | Personal health budgets; Specific acute activities: <ul style="list-style-type: none"> <li>- Rapid assessment upon presentation to acute care</li> <li>- Discharge support</li> <li>- Visual ward model</li> </ul>                    | Outcome                      |

|           |                                                                                                                                                   |                                                                                                                                                                                                                                                                                                                                |                                                                                                                                                                                                                                                                                                                                                                                                                                                                                                                           |         |
|-----------|---------------------------------------------------------------------------------------------------------------------------------------------------|--------------------------------------------------------------------------------------------------------------------------------------------------------------------------------------------------------------------------------------------------------------------------------------------------------------------------------|---------------------------------------------------------------------------------------------------------------------------------------------------------------------------------------------------------------------------------------------------------------------------------------------------------------------------------------------------------------------------------------------------------------------------------------------------------------------------------------------------------------------------|---------|
| Greenwich | Older people with complex or chronic conditions; individuals with mental health issues                                                            | Integrated commissioning through joint health and social care assessment, planning and management; Integrated care through multi-disciplinary teams including the voluntary sector, shared care plans, information and investment in self-care initiatives such as telehealth; Better prevention and management of acute care. | Personal health budgets;<br>Specific acute activities: <ul style="list-style-type: none"> <li>- Risk stratification to identify 11.5% at highest risk of hospital admission within one year</li> <li>- Virtual admission avoidance team</li> <li>- Greenwich Joint Emergency Team (JET)</li> <li>- Access to the medical diagnostic centre at the acute trust and outreach specialist opinion</li> <li>- Hospital Intervention Discharge Team</li> <li>- Community Assessment and Rehabilitation Teams (CARs).</li> </ul> | Outcome |
| Islington | Whole population with focus on vulnerable older people; people with long term conditions; young people at risk; people with mental health issues. | Integrated commissioning including patients through shared vision, planning, and information sharing; Integrated care activities including information sharing; Better prevention activities, including self-management support through personal health budgets and telehealth.                                                | Incentivising acute and community healthcare services through CQUIN<br>Care pathways for conditions like COPD.                                                                                                                                                                                                                                                                                                                                                                                                            | Aim     |
| Kent      | Adults with long term conditions and older people                                                                                                 | Integrated commissioning through information sharing and data mapping; Integrated care through multidisciplinary care teams organised around GP practices and workforce development; Better prevention through risk identification, and self-management activities such as personal health budgets and telehealth.             | Year of Care financial model and risk stratification; Multidisciplinary care team meetings and neighbourhood care teams, integrated working within A&E departments, community integrated care centres; Advanced Assistive technology partnership, joint working between paramedics and social care practitioners to respond quickly to 999 calls.                                                                                                                                                                         | Aim     |

|                        |                                                   |                                                                                                                                                                                                                                                                              |                                                                                                                                                                                                                                                                           |         |
|------------------------|---------------------------------------------------|------------------------------------------------------------------------------------------------------------------------------------------------------------------------------------------------------------------------------------------------------------------------------|---------------------------------------------------------------------------------------------------------------------------------------------------------------------------------------------------------------------------------------------------------------------------|---------|
| Leeds                  | Whole population                                  | Integrated commissioning with shared vision, outcomes and budget;<br>Integrated care through health and social care teams focused around GP practice populations and workforce development;<br>Prevention through self-management activities such as telehealth.             | Risk stratification and year of care model;<br>Divestment from emergency department; funding where appropriate to reinvest into community-based services;<br>Fully integrated health and social care bed unit                                                             | Outcome |
| North West London      | Whole population                                  | Integrated commissioning with a shared vision, responsibility, budget allocation and information sharing;<br>Integrated care through joined up services, incentives, multidisciplinary care teams and care plans;<br>Prevention and self-management through personalisation. | Integrated care organisation;<br>Bespoke IT tool to access patient data for both patients and care providers to help prevent readmission.                                                                                                                                 | Aim     |
| Southend               | Whole population with focus on high service users | Integrated commissioning through a Pioneer Strategic Group, with a shared budget and information management;<br>Integrated care through increased involvement of the voluntary sector and patients in co-design and workforce development.                                   | 7-day multidisciplinary teams;<br>Extension of the Single Point of Referral (SPOR) to reduce avoidable admissions and delayed transfers of care;<br>Hospital discharge-step down scheme.                                                                                  | Outcome |
| South Devon and Torbay | Whole population                                  | Integrated commissioning and governance arrangements with shared objectives, information sharing and bringing together leaders in the health and social care system;                                                                                                         | Support for a 24/7 hospice at home service through a chosen care home provider, with a team of specialist nurses and senior healthcare assistants, a rapid response service and night driver team;<br>Pilot of Sunday working over three consecutive weekends on 5 wards; | Outcome |

|                                      |                                                                                                                          |                                                                                                                                                                                                                                                                                                                                                                             |                                                                                                                                                                  |         |
|--------------------------------------|--------------------------------------------------------------------------------------------------------------------------|-----------------------------------------------------------------------------------------------------------------------------------------------------------------------------------------------------------------------------------------------------------------------------------------------------------------------------------------------------------------------------|------------------------------------------------------------------------------------------------------------------------------------------------------------------|---------|
|                                      |                                                                                                                          | Integrated care, not as an objective but an enabler, including an integrated care organisation providing acute, community and social care services 7 days a week, multidisciplinary teams including involvement of voluntary sector and workforce development;<br>Two programmes of work focused on better management of care and support for the elderly and young people. | Joined up IT including E-prescribing, E-booking and VitalPAC across healthcare organisations.                                                                    |         |
| South Tyneside                       | Whole population with focus on people who could benefit from initiatives on prevention, wellness promotion and self-care | Integrated commissioning and provision of care, through shared funding, joint decision-making, workforce development and information sharing.                                                                                                                                                                                                                               | Urgent care delivery group.<br>Predictive modelling to identify groups of patients vulnerable to hospital admission.                                             | Aim     |
| Stoke and North Staffordshire        | Cancer and end-of-life care patients                                                                                     | Integrated service development through co-design by CCGs, Macmillan Cancer Support, Local Authorities and Public Health England to create accountable Service Integrator; Integrated commissioning through shared arrangements across CCGs and social care and outcomes;<br>Integrated care through workforce development and co-design of care pathways.                   | Appointment of a principal provider for cancer and a principal provider for end of life care accountable for the determination of patient pathways through care. | -       |
| Waltham Forest, East London and City | People at risk of hospital admission                                                                                     | Integrated commissioning through data sharing, joint                                                                                                                                                                                                                                                                                                                        | Whole System Demonstrator pilot.<br>Waltham Forest case management and rapid response programme.                                                                 | Outcome |

|                |                                                                                  |                                                                                                                                                                                                                                                                                                                                                                                                                                                                                         |                                                                                                                                                                       |         |
|----------------|----------------------------------------------------------------------------------|-----------------------------------------------------------------------------------------------------------------------------------------------------------------------------------------------------------------------------------------------------------------------------------------------------------------------------------------------------------------------------------------------------------------------------------------------------------------------------------------|-----------------------------------------------------------------------------------------------------------------------------------------------------------------------|---------|
|                |                                                                                  | health/social care assessment, joint contracting and payment; Integrated care through workforce development, restructuring of secondary care providers, greater involvement of the voluntary sector, rapid response and discharge tools, acute discharge support.                                                                                                                                                                                                                       |                                                                                                                                                                       |         |
| Worcestershire | Whole population with focus on older people and people with long term conditions | Integrated commissioning through a shared funding of the oversight board, a shared vision, and community engagement.<br>Integrated care through service and clinical integration over organisational integration, reorganised acute care, multidisciplinary teams with involvement of the voluntary sector.<br>6 Transformation programme areas: Urgent Care; Out of hospital care; Specialised Commissioning; Acute Hospital Services; Future Lives; Children and Young People's Plan. | Virtual ward and integrated team projects.<br>Assistive technology for self-care and self-monitoring.<br>Improving Patient Flow strategy.<br>Personal Health Budgets. | Outcome |

## 2. Local Authority to Pioneer Lookup

| Local Authority Code | Local Authority           | Pioneer                                 |
|----------------------|---------------------------|-----------------------------------------|
| E08000016            | Barnsley                  | Barnsley                                |
| E06000050            | Cheshire West and Chester | Cheshire                                |
| E06000049            | Cheshire East             | Cheshire                                |
| E06000052            | Cornwall                  | Cornwall and Isles of Scilly            |
| E06000053            | Isles of Scilly           | Cornwall and Isles of Scilly            |
| E09000011            | Greenwich                 | Greenwich                               |
| E09000019            | Islington                 | Islington                               |
| E07000105            | Ashford                   | Kent                                    |
| E07000106            | Canterbury                | Kent                                    |
| E07000107            | Dartford                  | Kent                                    |
| E07000108            | Dover                     | Kent                                    |
| E07000109            | Gravesham                 | Kent                                    |
| E07000110            | Maidstone                 | Kent                                    |
| E07000111            | Sevenoaks                 | Kent                                    |
| E07000112            | Shepway                   | Kent                                    |
| E07000113            | Swale                     | Kent                                    |
| E07000114            | Thanet                    | Kent                                    |
| E07000115            | Tonbridge and Malling     | Kent                                    |
| E07000116            | Tunbridge Wells           | Kent                                    |
| E08000035            | Leeds                     | Leeds                                   |
| E09000005            | Brent                     | North West London                       |
| E09000009            | Ealing                    | North West London                       |
| E09000013            | Hammersmith and Fulham    | North West London                       |
| E09000015            | Harrow                    | North West London                       |
| E09000017            | Hillingdon                | North West London                       |
| E09000018            | Hounslow                  | North West London                       |
| E09000020            | Kensington and Chelsea    | North West London                       |
| E09000033            | Westminster               | North West London                       |
| E06000027            | Torbay                    | South Devon and Torbay                  |
| E07000044            | South Hams                | South Devon and Torbay                  |
| E07000045            | Teignbridge               | South Devon and Torbay                  |
| E08000023            | South Tyneside            | South Tyneside                          |
| E06000033            | Southend-on-Sea           | Southend                                |
| E07000192            | Cannock Chase             | Stoke and North Staffordshire           |
| E07000194            | Lichfield                 | Stoke and North Staffordshire           |
| E07000195            | Newcastle-under-Lyme      | Stoke and North Staffordshire           |
| E07000197            | Stafford                  | Stoke and North Staffordshire           |
| E07000198            | Staffordshire Moorlands   | Stoke and North Staffordshire           |
| E06000021            | Stoke-on-Trent            | Stoke and North Staffordshire           |
| E07000196            | South Staffordshire       | Stoke and North Staffordshire           |
| E09000031            | Waltham Forest            | Waltham Forest and East London and City |
| E09000025            | Newham                    | Waltham Forest and East London and City |
| E09000030            | Tower Hamlets             | Waltham Forest and East London and City |
| E07000234            | Bromsgrove                | Worcestershire                          |

|           |               |                |
|-----------|---------------|----------------|
| E07000235 | Malvern Hills | Worcestershire |
| E07000236 | Redditch      | Worcestershire |
| E07000237 | Worcester     | Worcestershire |
| E07000238 | Wychavon      | Worcestershire |
| E07000239 | Wyre Forest   | Worcestershire |



### 3. Emergency admission rates for individual local authorities within Pioneers at baseline and follow up, with percentage differences compared to baseline

| Local Authority Code | Local Authority              | Emergency Admission Rate |         |         | Percentage Difference |         |
|----------------------|------------------------------|--------------------------|---------|---------|-----------------------|---------|
|                      |                              | Baseline                 | 2014/15 | 2015/16 | 2014/15               | 2015/16 |
| E08000016            | Barnsley                     | 10,992                   | 11,769  | 12,325  | 7.07%                 | 12.13%  |
| E06000049            | Cheshire East                | 11,485                   | 12,537  | 12,954  | 9.17%                 | 12.80%  |
| E06000050            | Cheshire West and Chester    | 11,033                   | 11,782  | 11,963  | 6.79%                 | 8.42%   |
| E06000052/53         | Cornwall and Isles of Scilly | 8,170                    | 8,061   | 8,193   | -1.33%                | 0.29%   |
| E09000011            | Greenwich                    | 8,168                    | 8,226   | 9,513   | 0.71%                 | 16.47%  |
| E09000019            | Islington                    | 6,324                    | 6,320   | 6,096   | -0.06%                | -3.60%  |
| E07000105            | Ashford                      | 8,708                    | 9,785   | 10,506  | 12.37%                | 20.65%  |
| E07000106            | Canterbury                   | 9,663                    | 10,503  | 10,499  | 8.70%                 | 8.66%   |
| E07000107            | Dartford                     | 10,325                   | 12,037  | 11,063  | 16.59%                | 7.15%   |
| E07000108            | Dover                        | 9,201                    | 10,411  | 10,809  | 13.14%                | 17.47%  |
| E07000109            | Gravesham                    | 9,529                    | 10,825  | 10,379  | 13.60%                | 8.92%   |
| E07000110            | Maidstone                    | 9,553                    | 10,470  | 10,219  | 9.60%                 | 6.97%   |
| E07000111            | Sevenoaks                    | 8,420                    | 8,842   | 8,114   | 5.01%                 | -3.64%  |
| E07000112            | Shepway                      | 8,921                    | 9,566   | 10,274  | 7.24%                 | 15.17%  |
| E07000113            | Swale                        | 10,590                   | 10,746  | 12,117  | 1.47%                 | 14.42%  |
| E07000114            | Thanet                       | 9,245                    | 9,952   | 10,194  | 7.65%                 | 10.27%  |
| E07000115            | Tonbridge and Malling        | 8,842                    | 8,632   | 8,448   | -2.37%                | -4.46%  |
| E07000116            | Tunbridge Wells              | 9,188                    | 8,631   | 7,483   | -6.06%                | -18.55% |
| E08000035            | Leeds                        | 11,399                   | 9,605   | 10,155  | -15.74%               | -10.91% |
| E09000005            | Brent                        | 8,882                    | 8,541   | 8,425   | -3.84%                | -5.15%  |
| E09000009            | Ealing                       | 10,246                   | 9,828   | 10,398  | -4.08%                | 1.49%   |
| E09000013            | Hammersmith and Fulham       | 10,312                   | 9,588   | 9,876   | -7.03%                | -4.23%  |
| E09000015            | Harrow                       | 8,397                    | 8,430   | 8,084   | 0.39%                 | -3.73%  |
| E09000017            | Hillingdon                   | 9,753                    | 9,636   | 9,346   | -1.20%                | -4.18%  |
| E09000018            | Hounslow                     | 8,998                    | 9,751   | 11,053  | 8.36%                 | 22.83%  |
| E09000020            | Kensington and Chelsea       | 7,688                    | 7,094   | 7,048   | -7.73%                | -8.32%  |
| E09000033            | Westminster                  | 7,095                    | 6,454   | 6,266   | -9.04%                | -11.70% |
| E07000044            | South Hams                   | 6,591                    | 6,413   | 6,962   | -2.69%                | 5.63%   |
| E07000045            | Teignbridge                  | 7,657                    | 8,182   | 9,275   | 6.86%                 | 21.13%  |
| E06000027            | Torbay                       | 7,998                    | 8,296   | 10,173  | 3.72%                 | 27.19%  |
| E08000023            | South Tyneside               | 11,153                   | 10,445  | 11,150  | -6.35%                | -0.03%  |
| E06000033            | Southend-on-Sea              | 9,243                    | 10,397  | 10,224  | 12.49%                | 10.61%  |
| E07000192            | Cannock Chase                | 10,438                   | 10,611  | 10,083  | 1.66%                 | -3.40%  |
| E07000194            | Lichfield                    | 8,754                    | 9,424   | 9,971   | 7.65%                 | 13.90%  |
| E07000195            | Newcastle-under-Lyme         | 11,919                   | 12,034  | 12,625  | 0.96%                 | 5.92%   |
| E07000196            | South Staffordshire          | 8,353                    | 8,907   | 9,575   | 6.64%                 | 14.63%  |
| E07000197            | Stafford                     | 10,289                   | 10,441  | 9,900   | 1.47%                 | -3.78%  |
| E07000198            | Staffordshire Moorlands      | 8,448                    | 8,649   | 9,162   | 2.37%                 | 8.45%   |
| E06000021            | Stoke-on-Trent               | 11,438                   | 11,704  | 12,959  | 2.32%                 | 13.29%  |

|           |                |        |        |        |         |         |
|-----------|----------------|--------|--------|--------|---------|---------|
| E09000025 | Newham         | 7,897  | 7,535  | 7,802  | -4.58%  | -1.20%  |
| E09000030 | Tower Hamlets  | 10,166 | 9,103  | 8,795  | -10.45% | -13.49% |
| E09000031 | Waltham Forest | 9,489  | 9,333  | 8,242  | -1.64%  | -13.14% |
| E07000234 | Bromsgrove     | 8,452  | 9,292  | 9,165  | 9.94%   | 8.43%   |
| E07000235 | Malvern Hills  | 8,289  | 7,937  | 7,360  | -4.25%  | -11.21% |
| E07000236 | Redditch       | 10,556 | 10,650 | 11,534 | 0.89%   | 9.26%   |
| E07000237 | Worcester      | 9,858  | 9,180  | 9,705  | -6.88%  | -1.56%  |
| E07000238 | Wychavon       | 9,094  | 8,475  | 8,760  | -6.81%  | -3.68%  |
| E07000239 | Wyre Forest    | 7,855  | 7,366  | 7,511  | -6.23%  | -4.38%  |

#### 4. Sensitivity analysis: excluding Stoke and North Staffordshire Pioneer

|                                                        | 2014/15           | 2015/16           |
|--------------------------------------------------------|-------------------|-------------------|
| <b>Model Coefficients (p value)</b>                    |                   |                   |
| Intercept                                              | -5.4249 (<0.0001) | -5.4267 (<0.0001) |
| Non-Pioneer/Pioneer                                    | -0.0223 (0.2664)  | -0.0223 (0.2673)  |
| Baseline/Follow-Up                                     | 0.0487 (<0.0001)  | 0.0631 (<0.0001)  |
| Interaction                                            | -0.0308 (0.0464)  | -0.0259 (0.1665)  |
| <b>Percentage Difference [95% confidence interval]</b> |                   |                   |
| Non-Pioneer                                            | 4.99 [3.81,6.18]  | 6.51 [5.18,7.86]  |
| Pioneer                                                | 1.80 [-0.93,4.61] | 3.78 [0.33,7.35]  |

Parallel trends interaction term p value = 0.3030

#### 5. Sensitivity analysis: individual baseline years compared to 2014/15

| Baseline Year                                          | 2010/11           | 2011/12           | 2012/13           |
|--------------------------------------------------------|-------------------|-------------------|-------------------|
| <b>Parallel Trends P Value</b>                         | 0.8608            | 0.3326            | 0.9899            |
| <b>Model Coefficients (p value)</b>                    |                   |                   |                   |
| Intercept                                              | -5.4148 (<0.0001) | -5.4504 (<0.0001) | -5.3476 (<0.0001) |
| Non-Pioneer/Pioneer                                    | -0.0040 (0.8524)  | -0.0051 (0.8016)  | -0.0077 (0.6739)  |
| Baseline/Time 2                                        | 0.0844 (<0.0001)  | 0.0512 (<0.0001)  | 0.0696 (<0.0001)  |
| Interaction                                            | -0.0298 (0.0860)  | -0.0289 (0.0720)  | -0.0260 (0.0189)  |
| <b>Percentage Difference [95% confidence interval]</b> |                   |                   |                   |
| Non-Pioneer                                            | 8.81 [6.57,11.09] | 5.26 [3.62,6.91]  | 7.21 [6.05,8.38]  |
| Pioneer                                                | 5.61 [1.77,9.59]  | 2.26 [-0.70,5.30] | 4.46 [2.45,6.51]  |
